# Supplementary material for: Transition metal-free regioselective direct acylation of quinazolines for the synthesis of acylquinazoline derivatives
Source: Royal Society of Chemistry journal article supplement (doi:10.1039/d3ob01349a), 2023-01-01

## Supporting Information

### Transition Metal-Free Directly Regioselective Acylation of Quinazolines for the Synthesis of Acylquinazoline Derivatives

Wei Chen,<sup>#</sup> Jingjun Fang,<sup>#</sup> Jian Huang, Qin Yang, Zhibin Song, Qiuping Ding

,YiyuanPeng\*

*Key Laboratory for Green Chemistry of Jiangxi Province, Jiangxi Normal University, 99 Ziyang  
Avenue, Nanchang 330022, China.*

[yypeng@jxnu.edu.cn](mailto:yypeng@jxnu.edu.cn)

#### Table of Contents

|                                                         |           |
|---------------------------------------------------------|-----------|
| <b>I. Copy of NMR .....</b>                             | <b>2</b>  |
| <b>Copy of Products 3 NMR .....</b>                     | <b>2</b>  |
| <b>Copy of Products 5 NMR .....</b>                     | <b>31</b> |
| <b>Copy of Products 7 NMR .....</b>                     | <b>45</b> |
| <b>Copy of Products 9 NMR .....</b>                     | <b>58</b> |
| <b>Copy of Products 10 NMR .....</b>                    | <b>64</b> |
| <b>Copy of Products 11 NMR .....</b>                    | <b>74</b> |
| <b>Copy of Products 12 NMR .....</b>                    | <b>75</b> |
| <b>II. The HPLC-MS Figure of adducts 13 and 14.....</b> | <b>76</b> |

# I. Copy of NMR

## Copy of Products 3 NMR

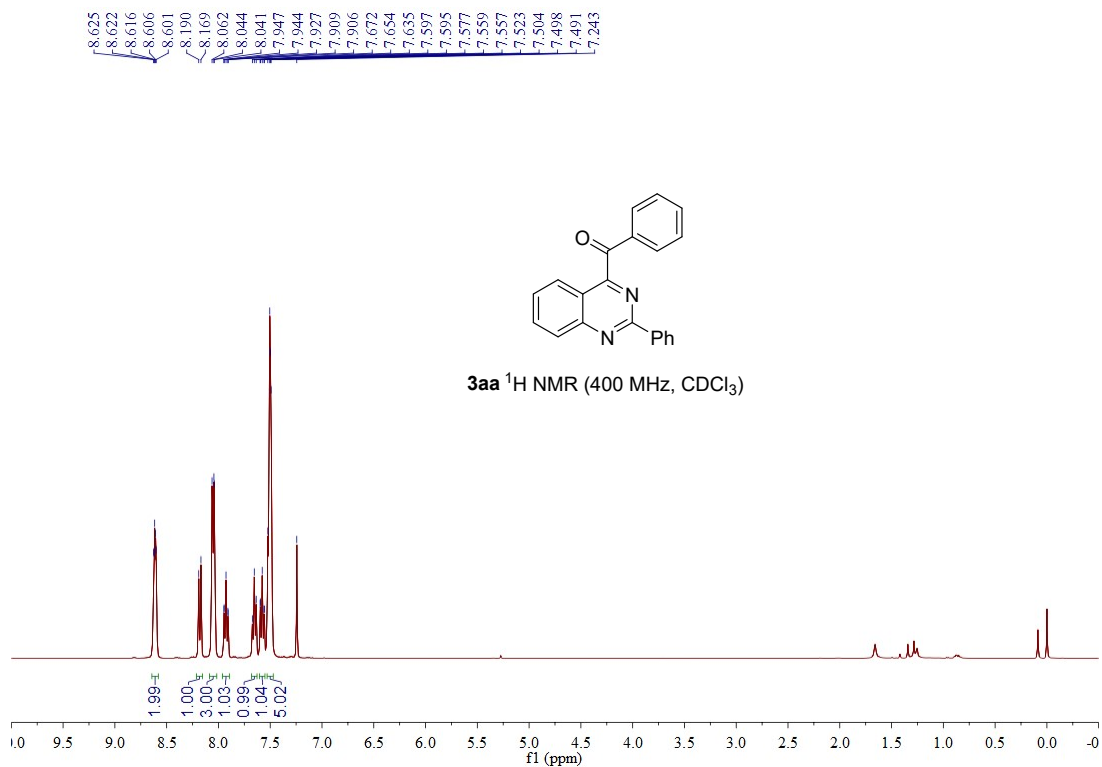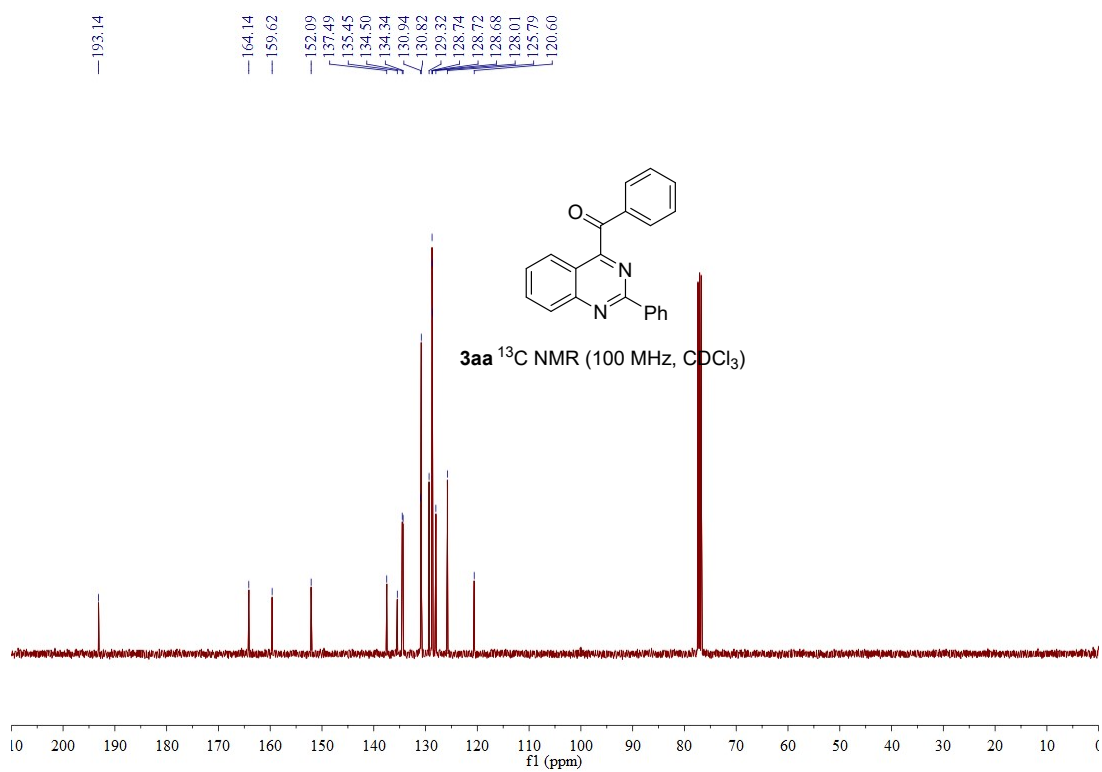

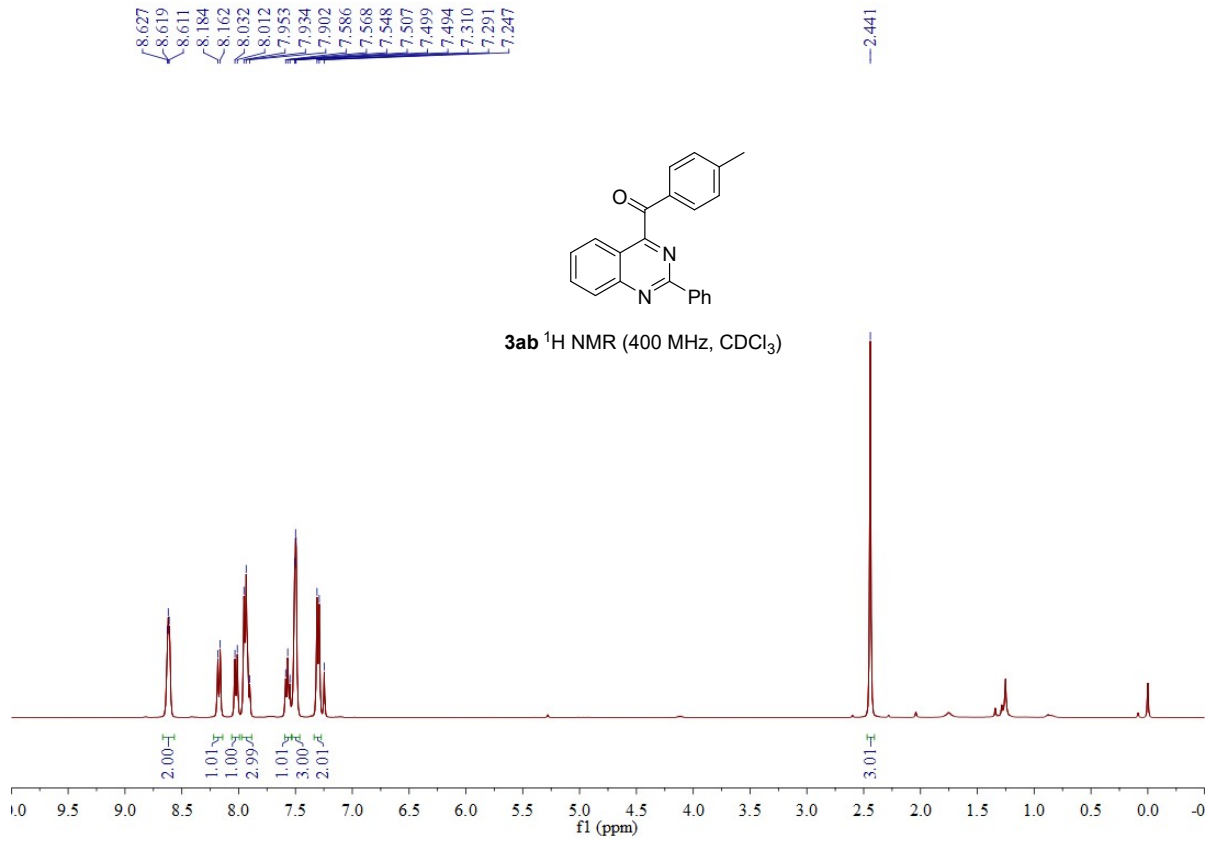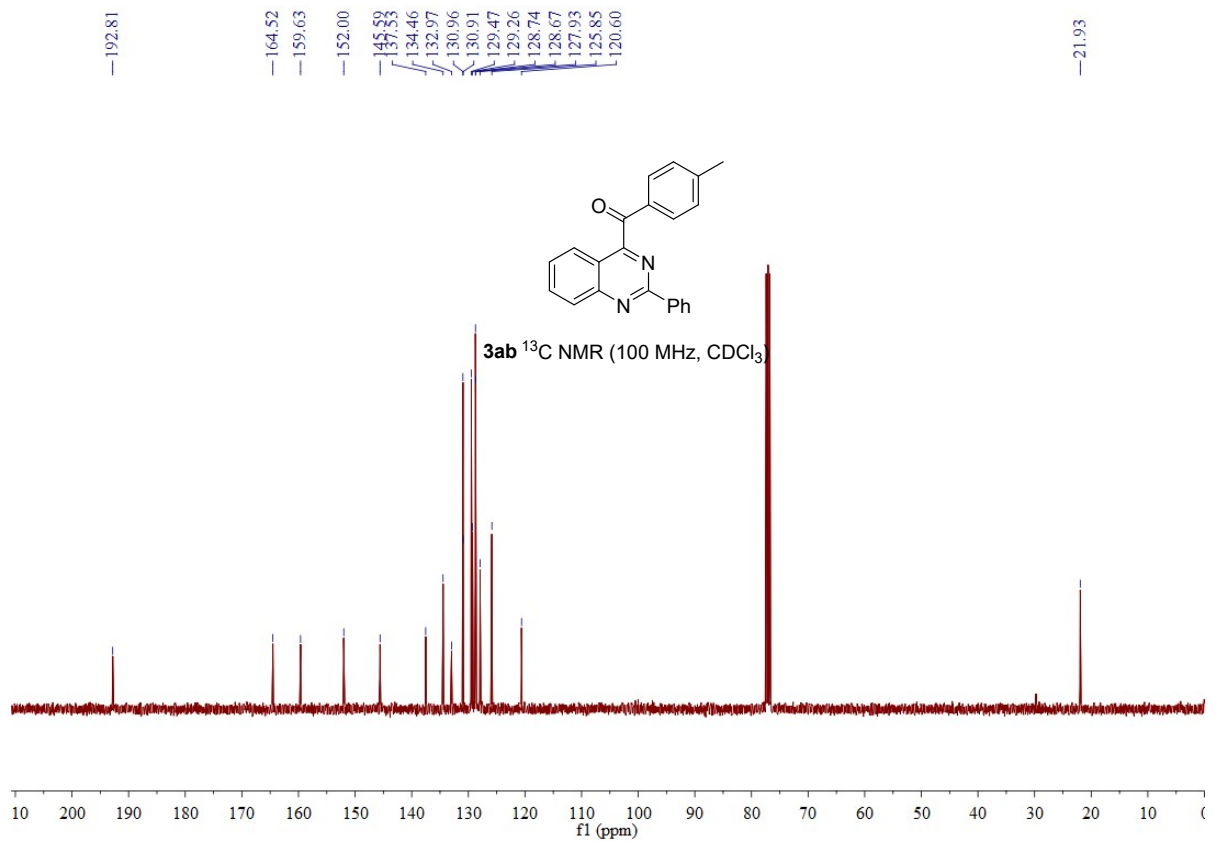

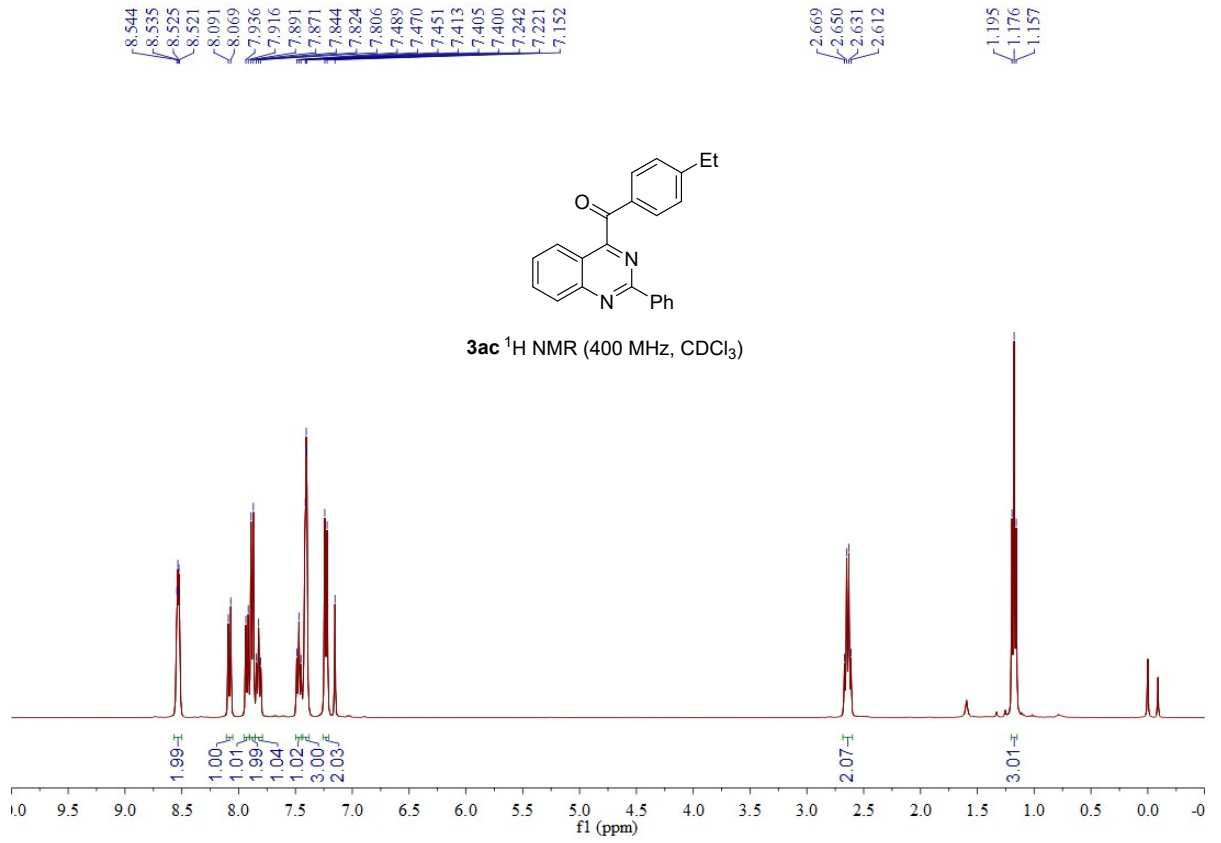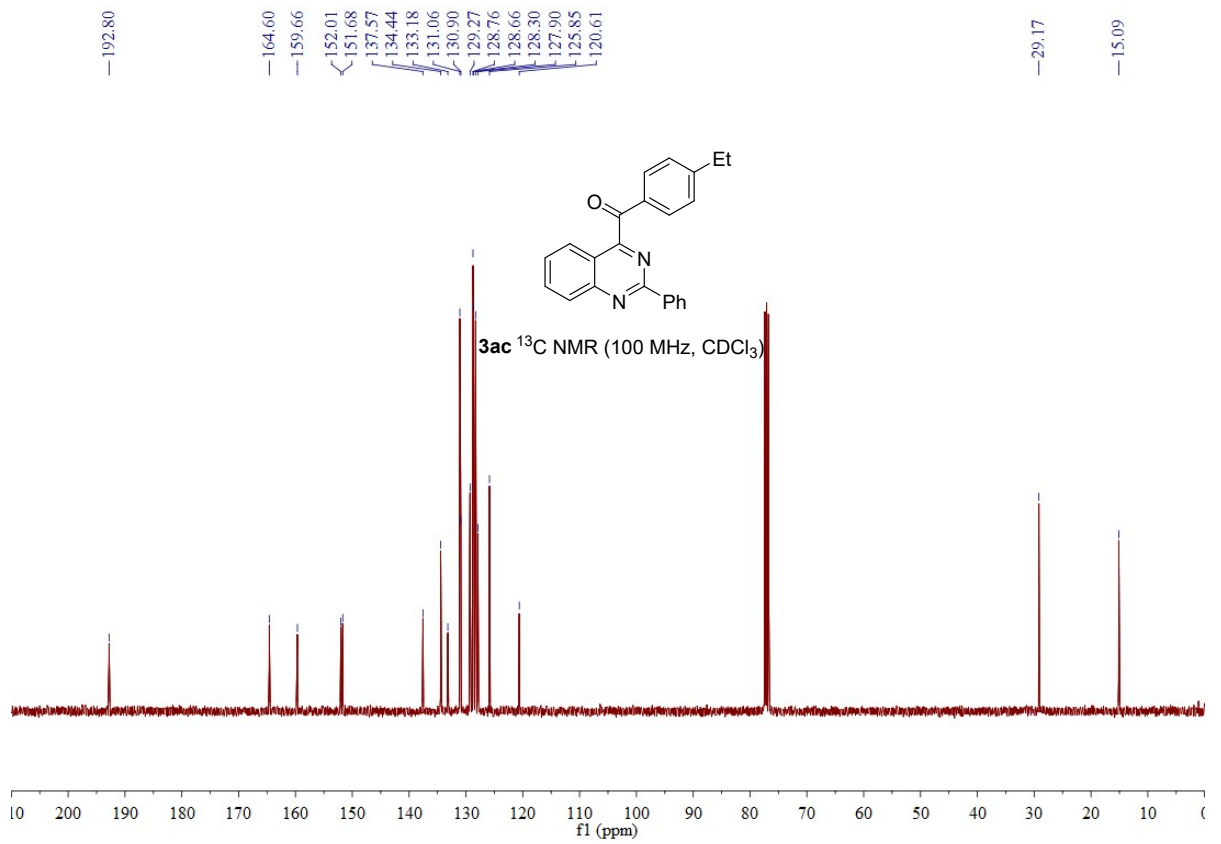

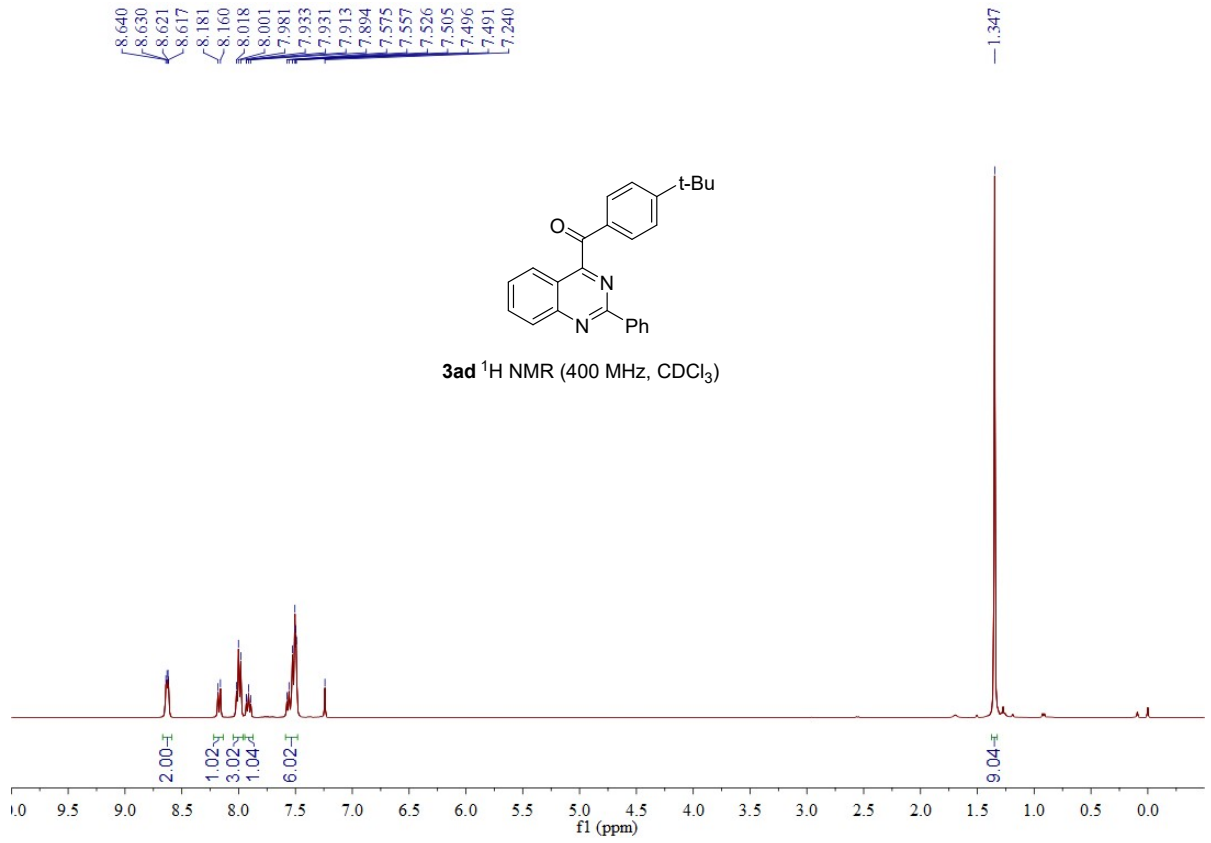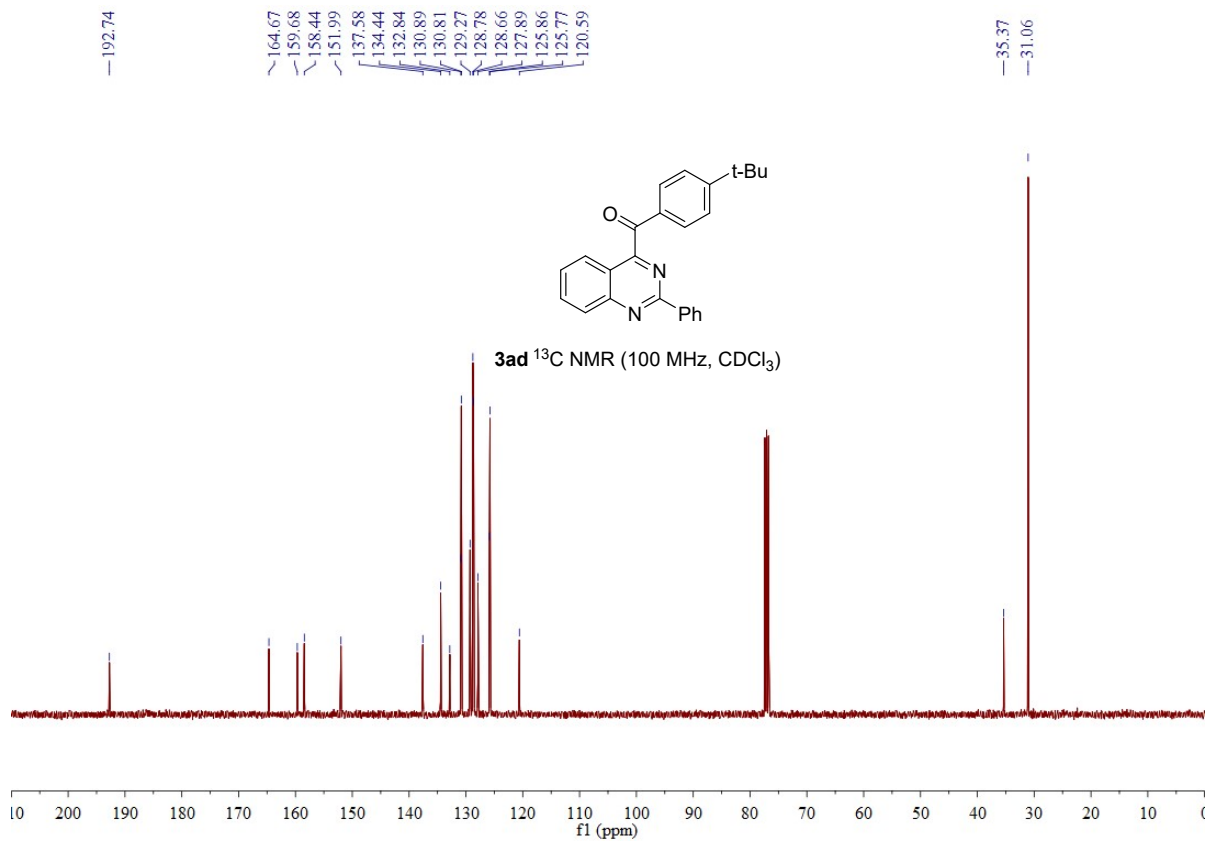

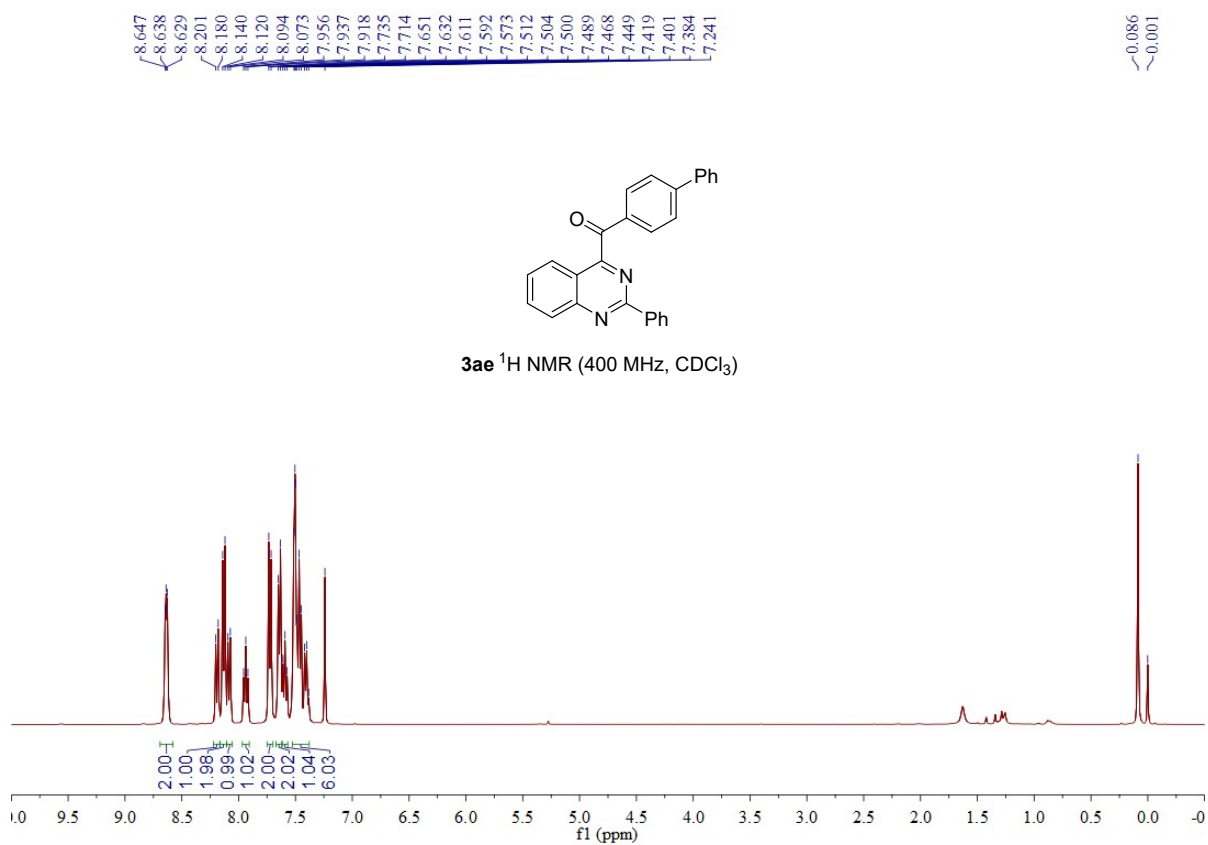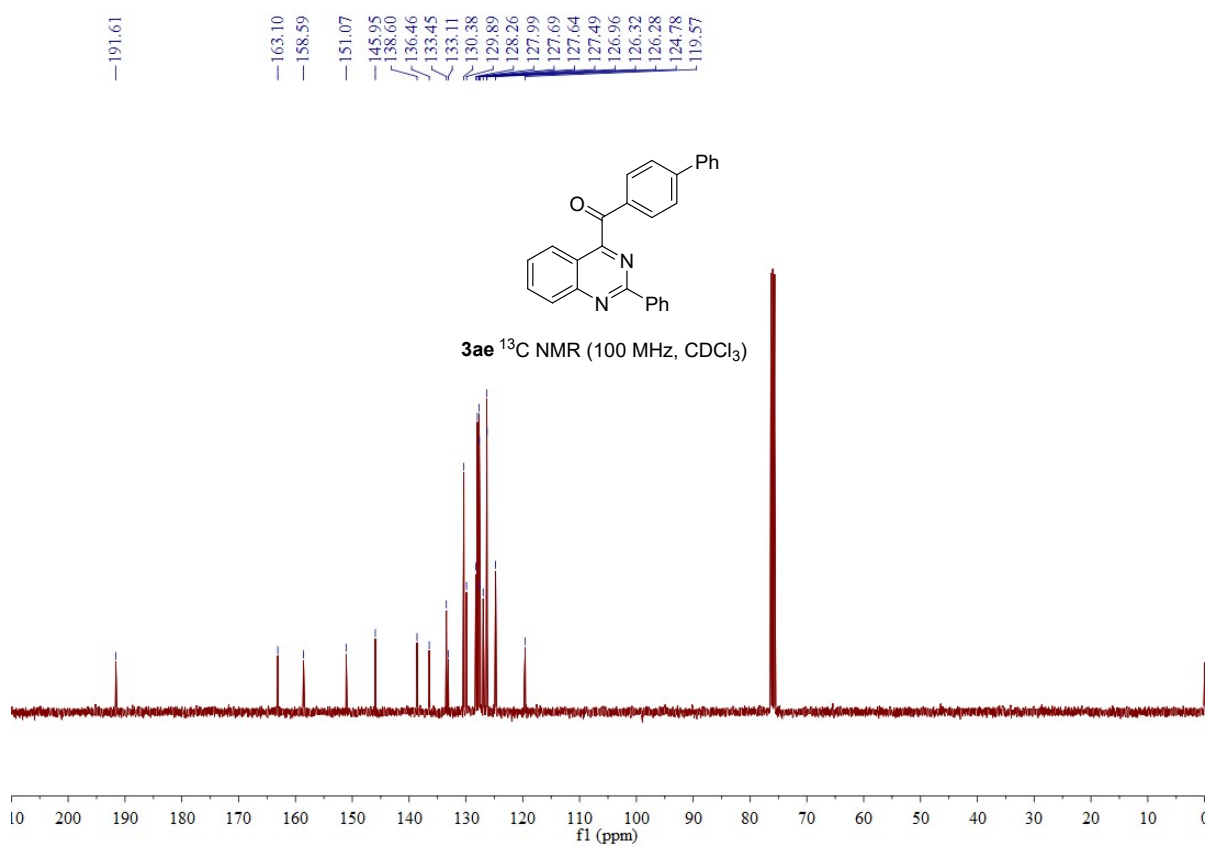

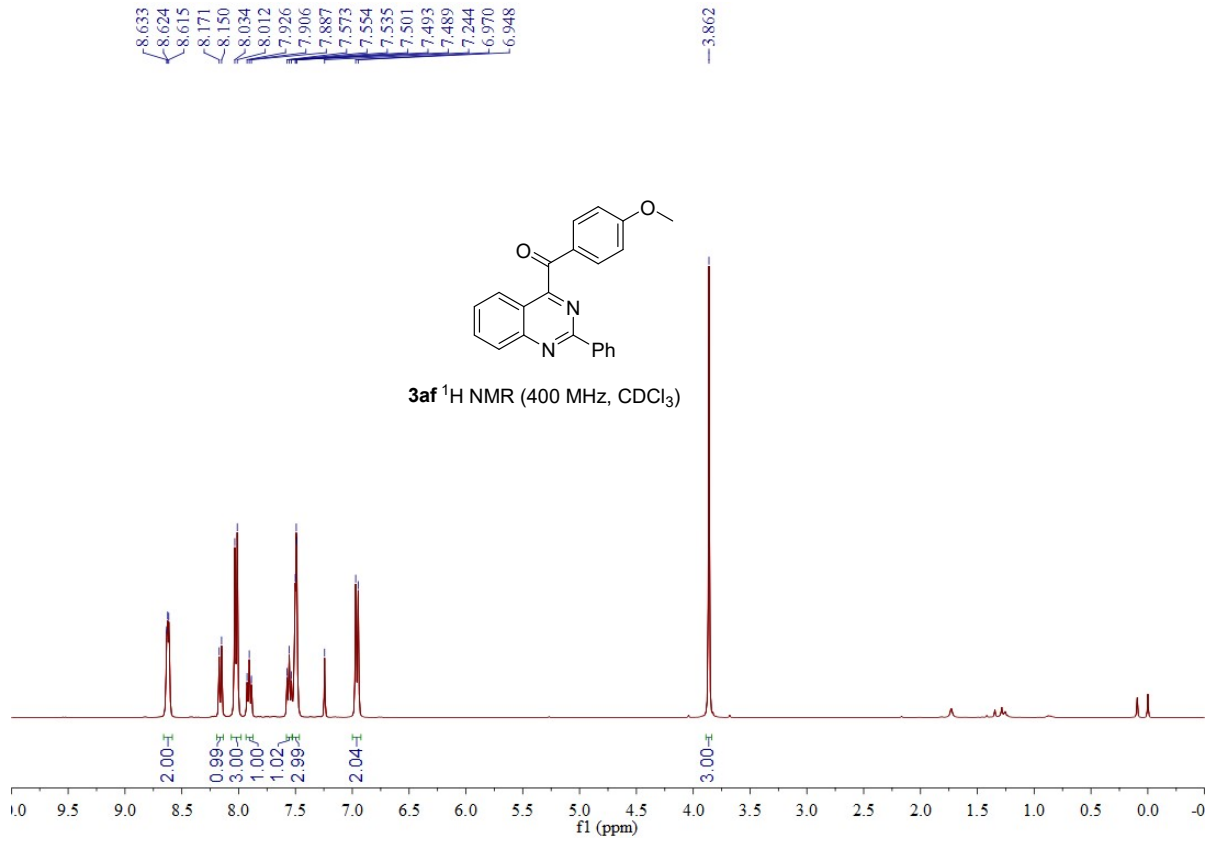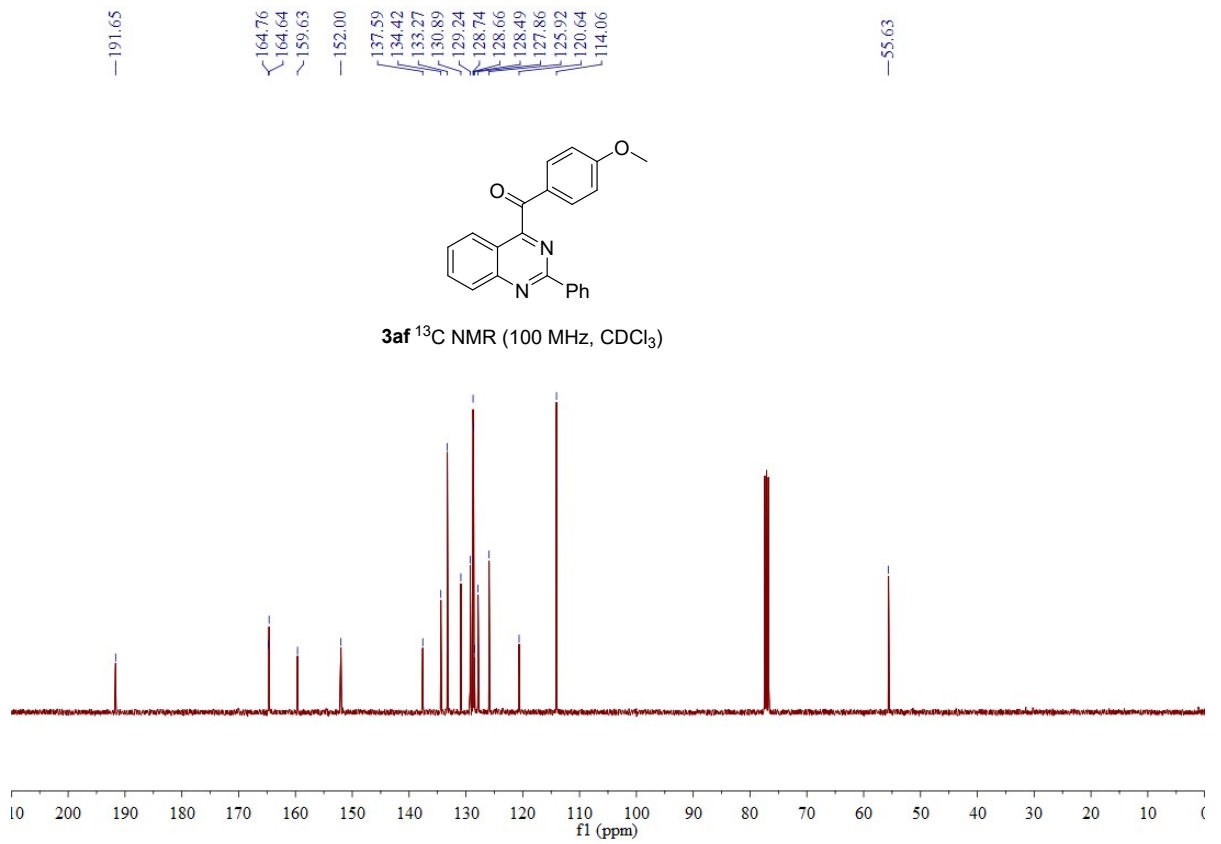

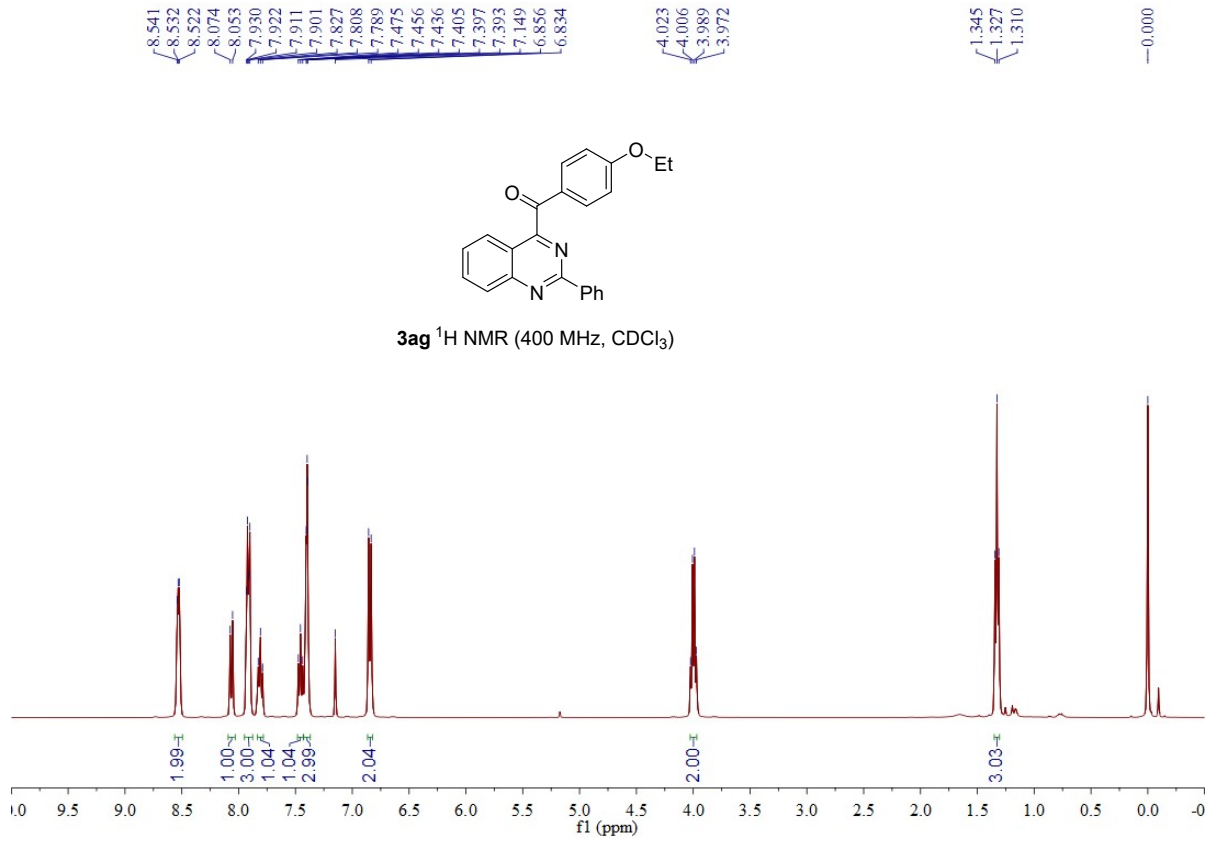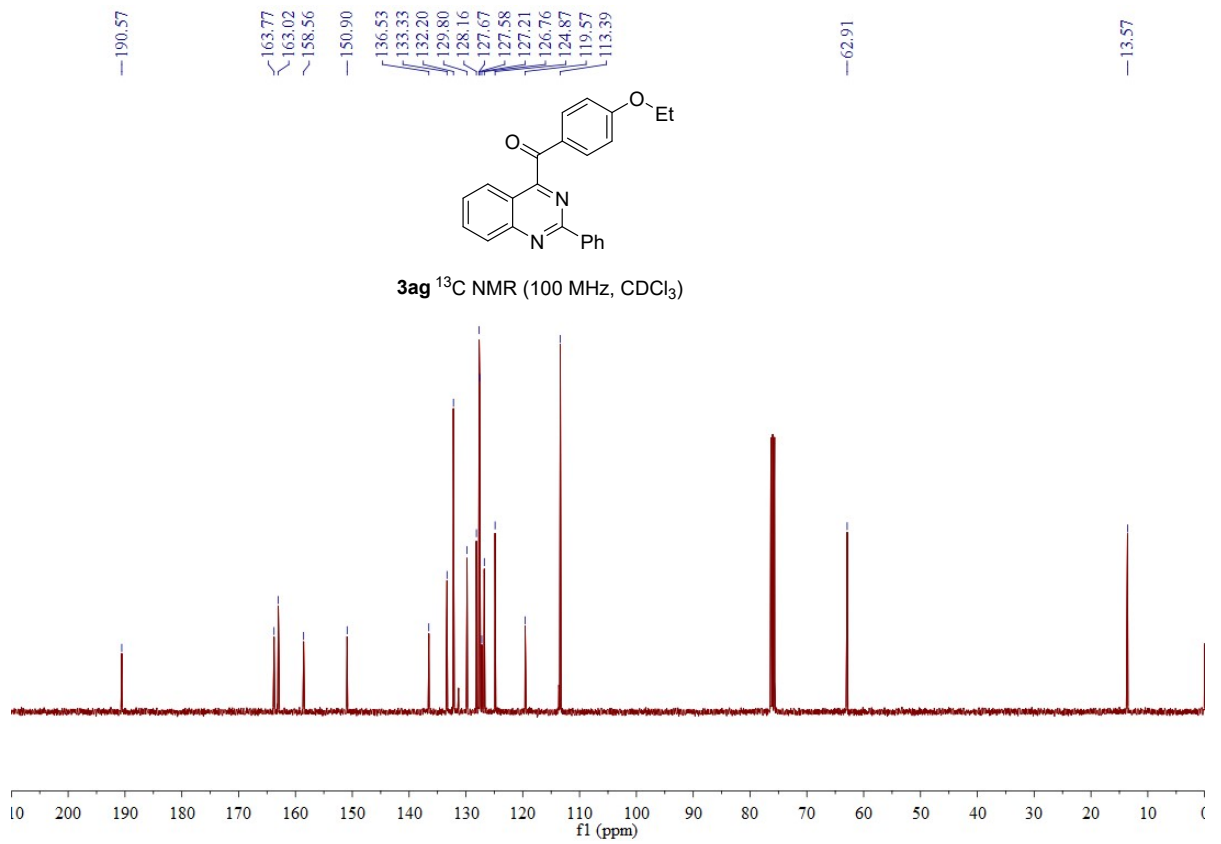



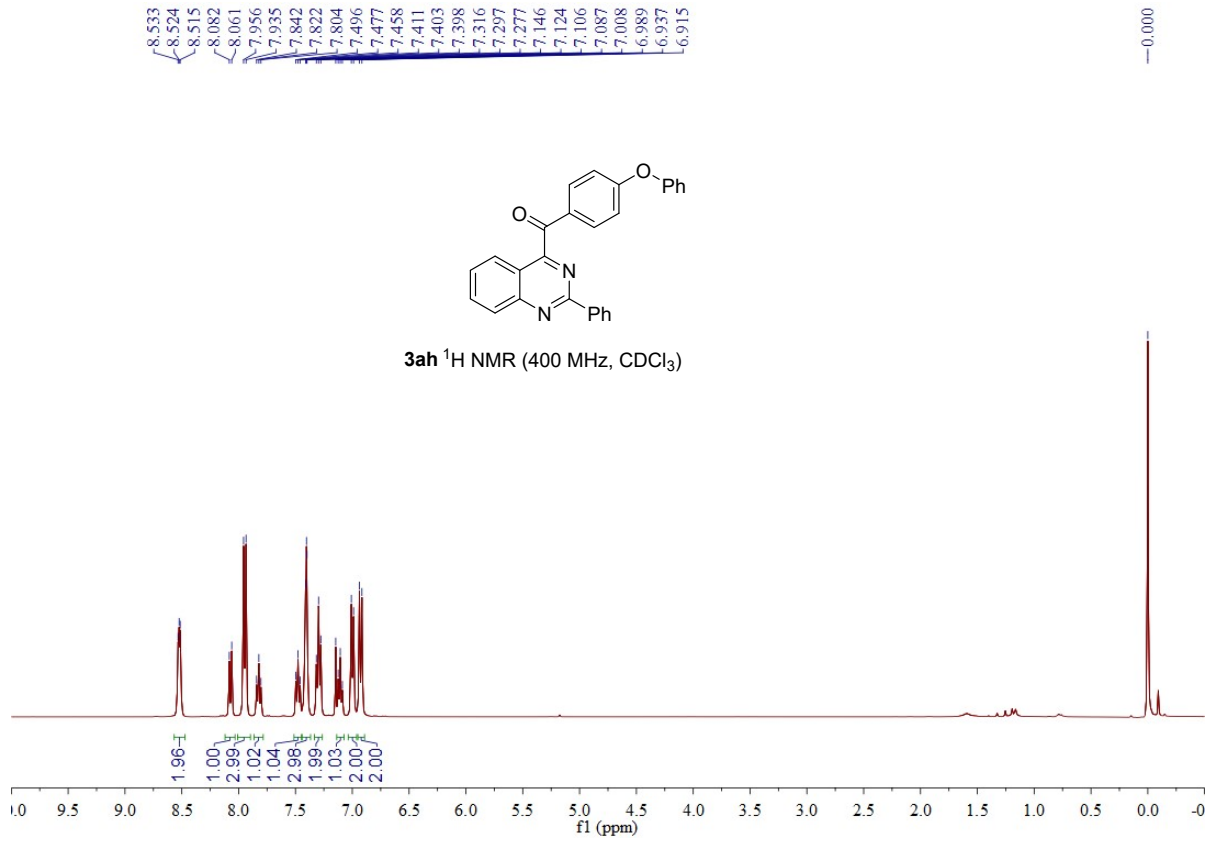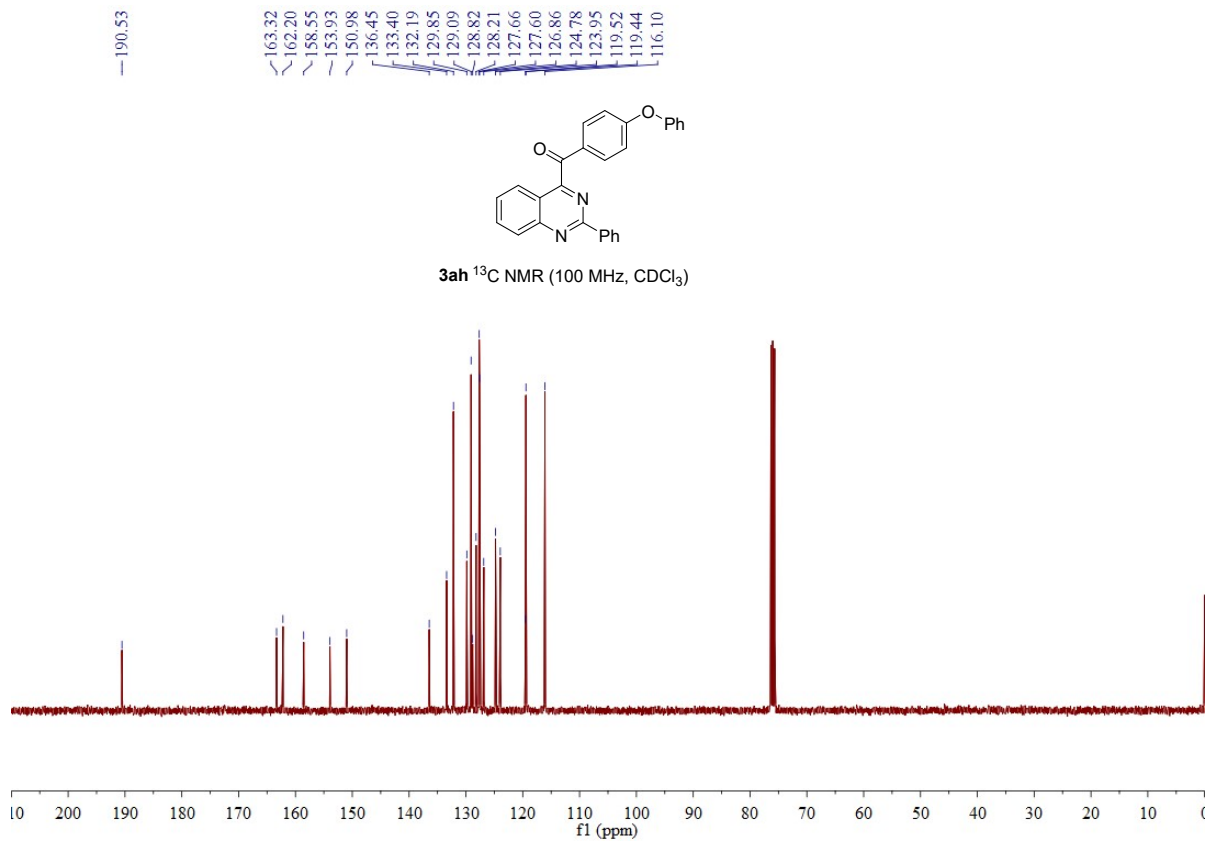

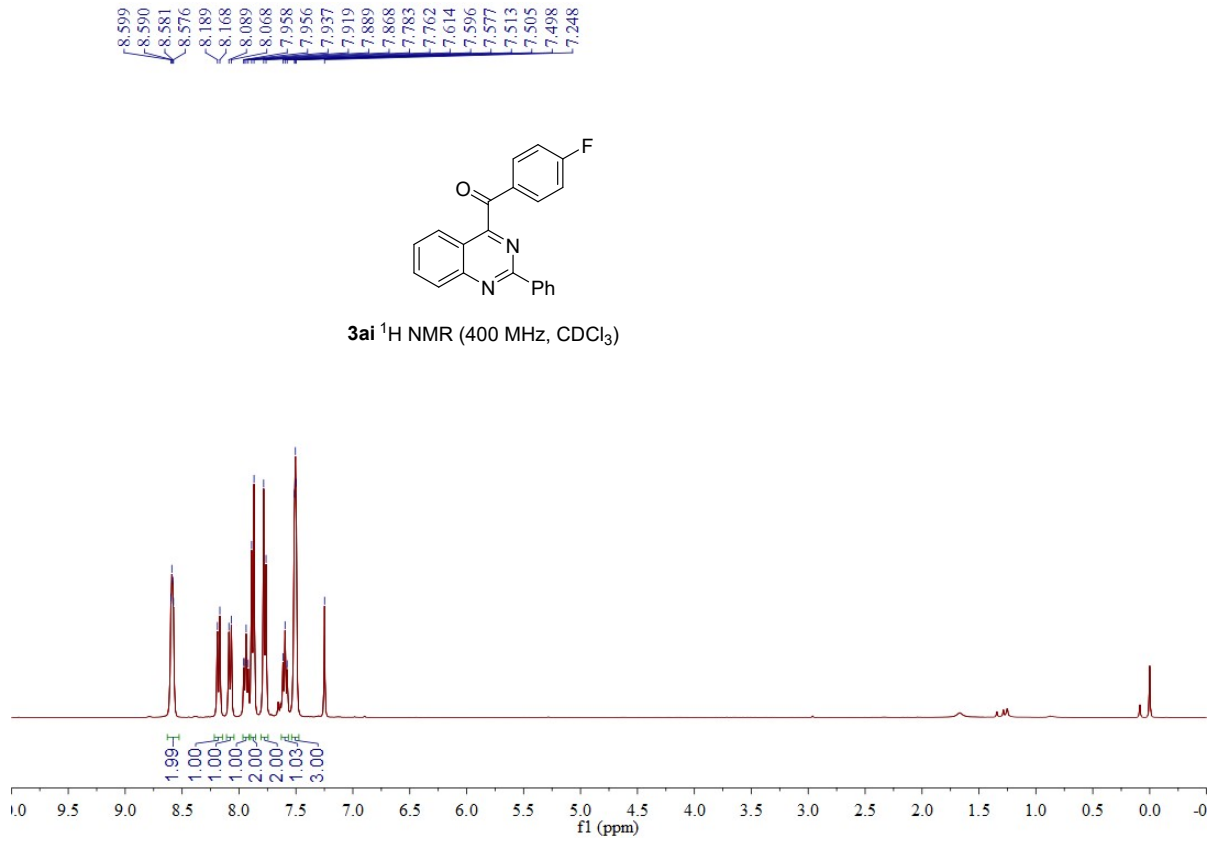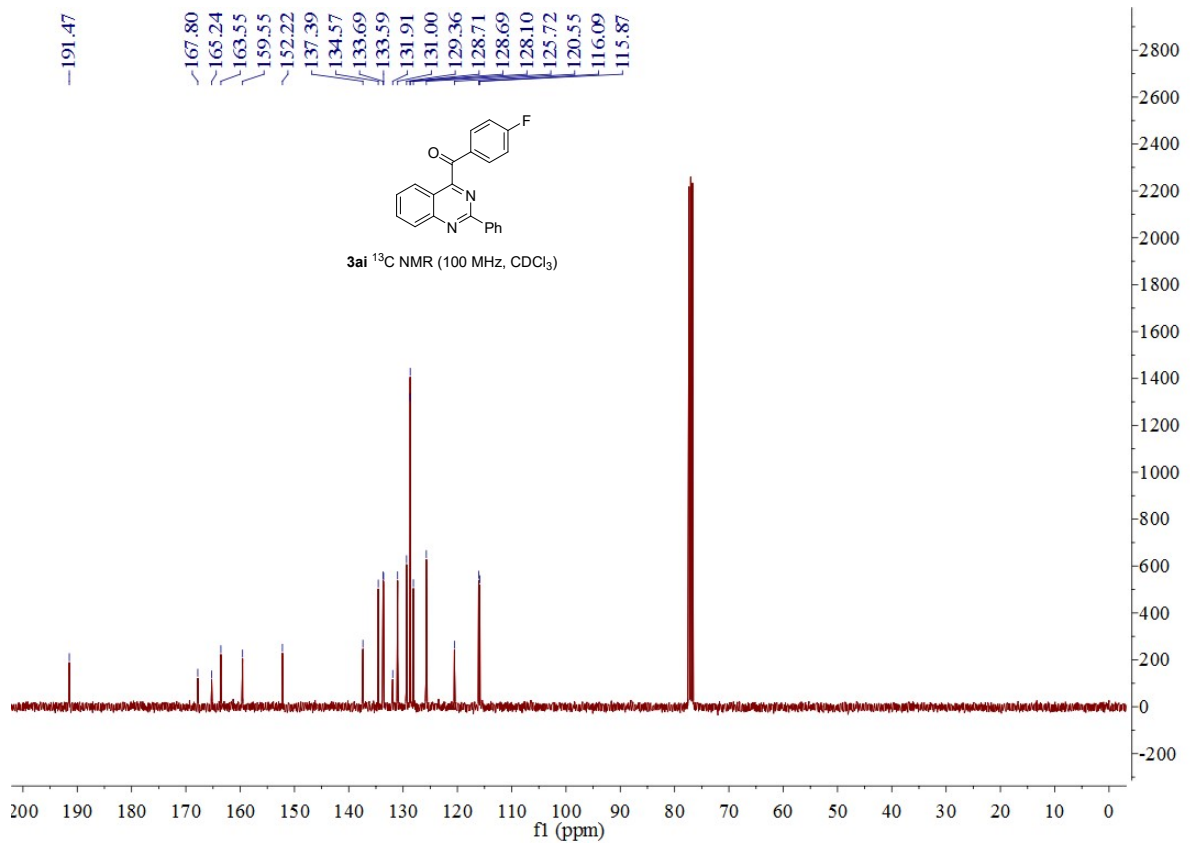

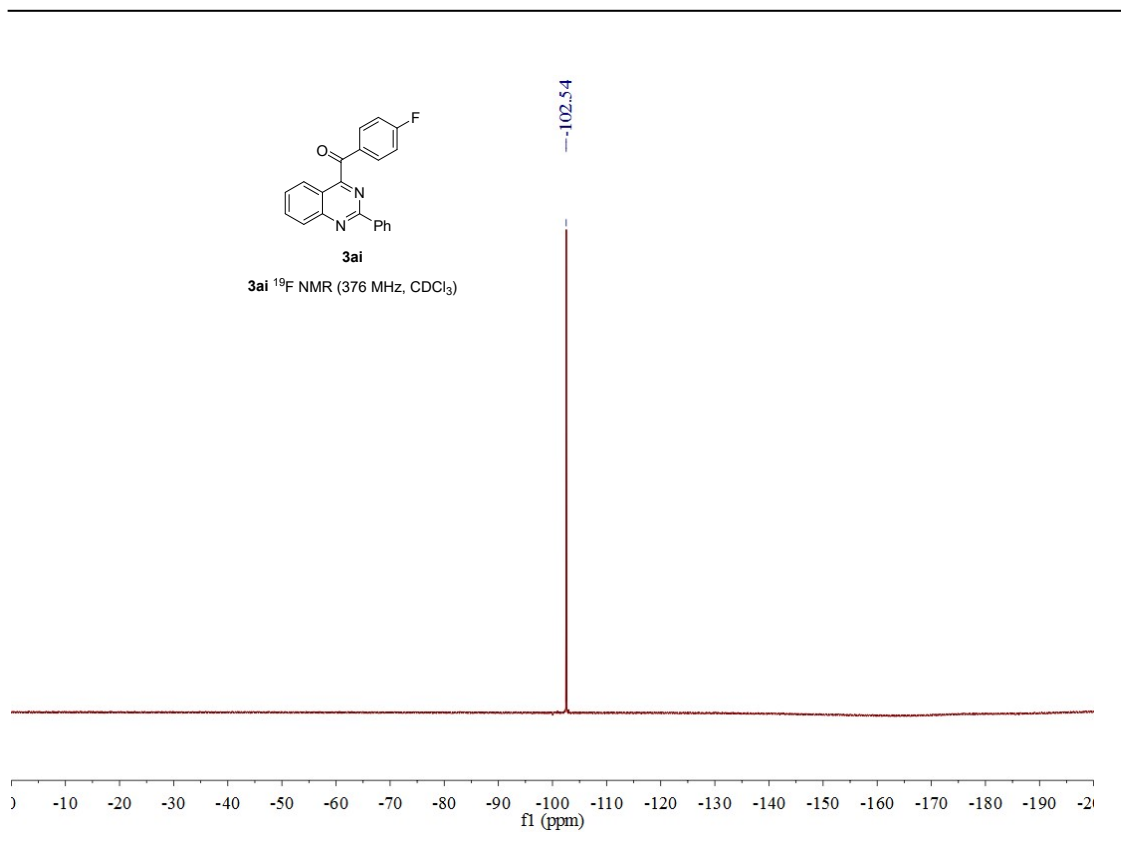

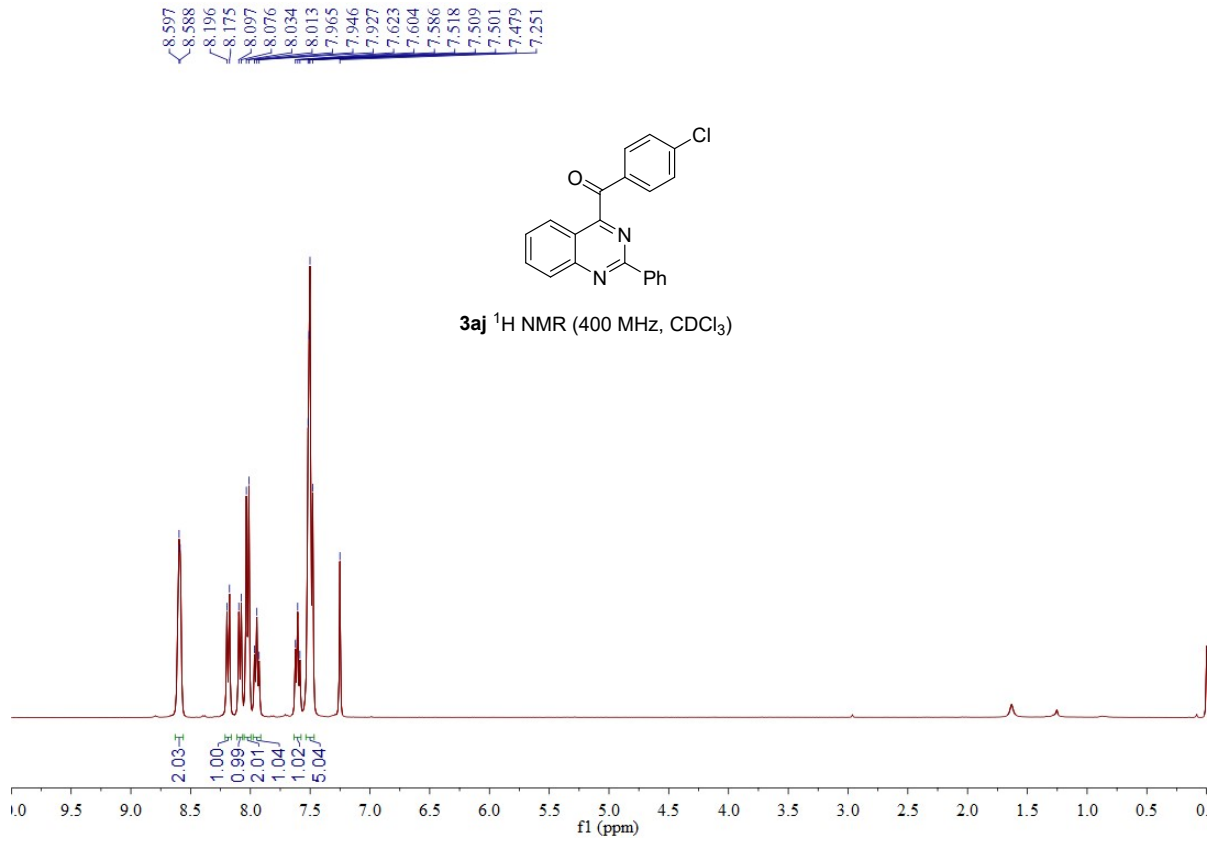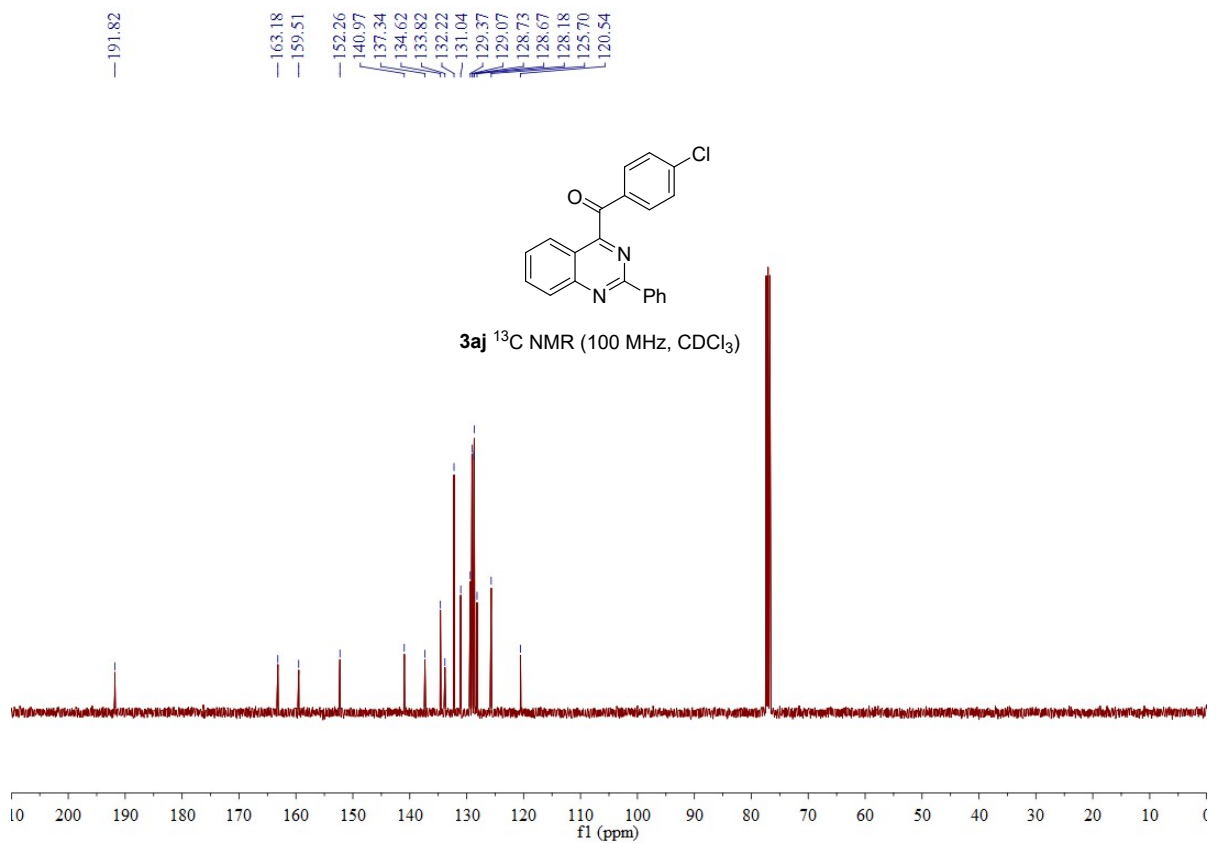

8.595  
8.588  
8.201  
8.180  
8.101  
8.081  
7.973  
7.956  
7.936  
7.676  
7.655  
7.633  
7.614  
7.595  
7.517  
7.257

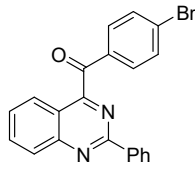

**3ak**  $^1\text{H}$  NMR (400 MHz,  $\text{CDCl}_3$ )

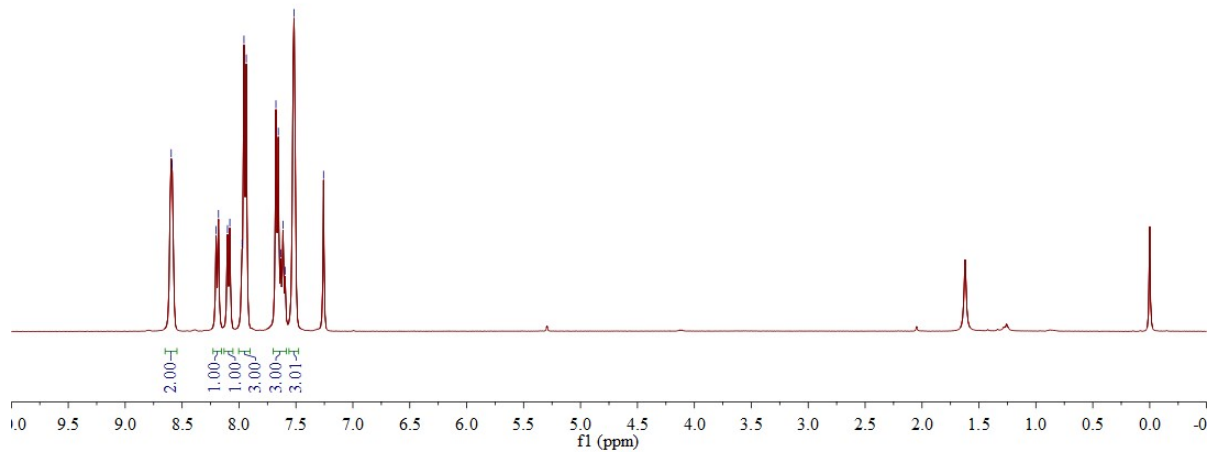

192.05  
163.11  
159.51  
152.26  
137.31  
134.64  
134.21  
132.28  
132.06  
131.05  
129.88  
129.37  
128.74  
128.67  
128.21  
125.69  
120.53

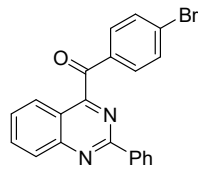

**3ak**  $^{13}\text{C}$  NMR (100 MHz,  $\text{CDCl}_3$ )

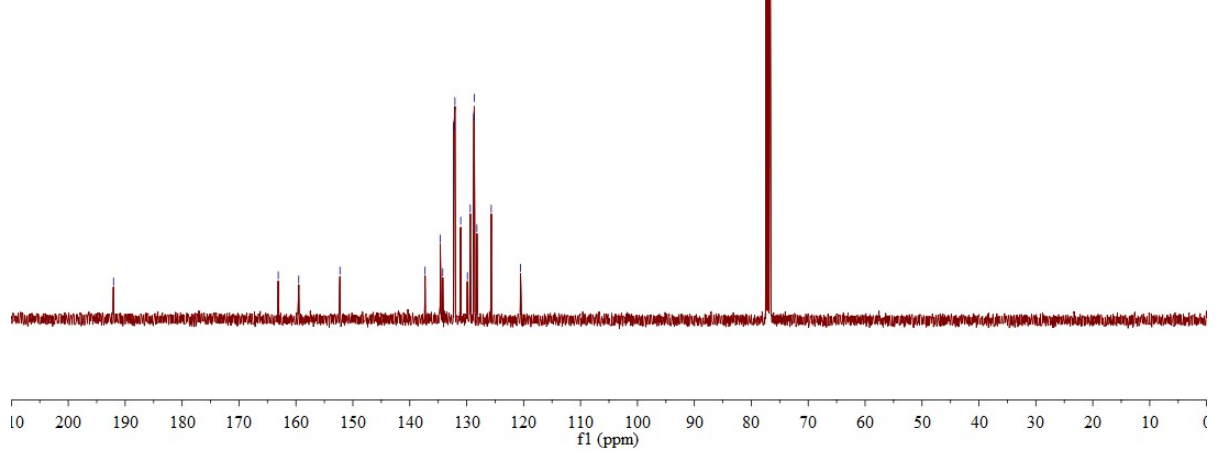

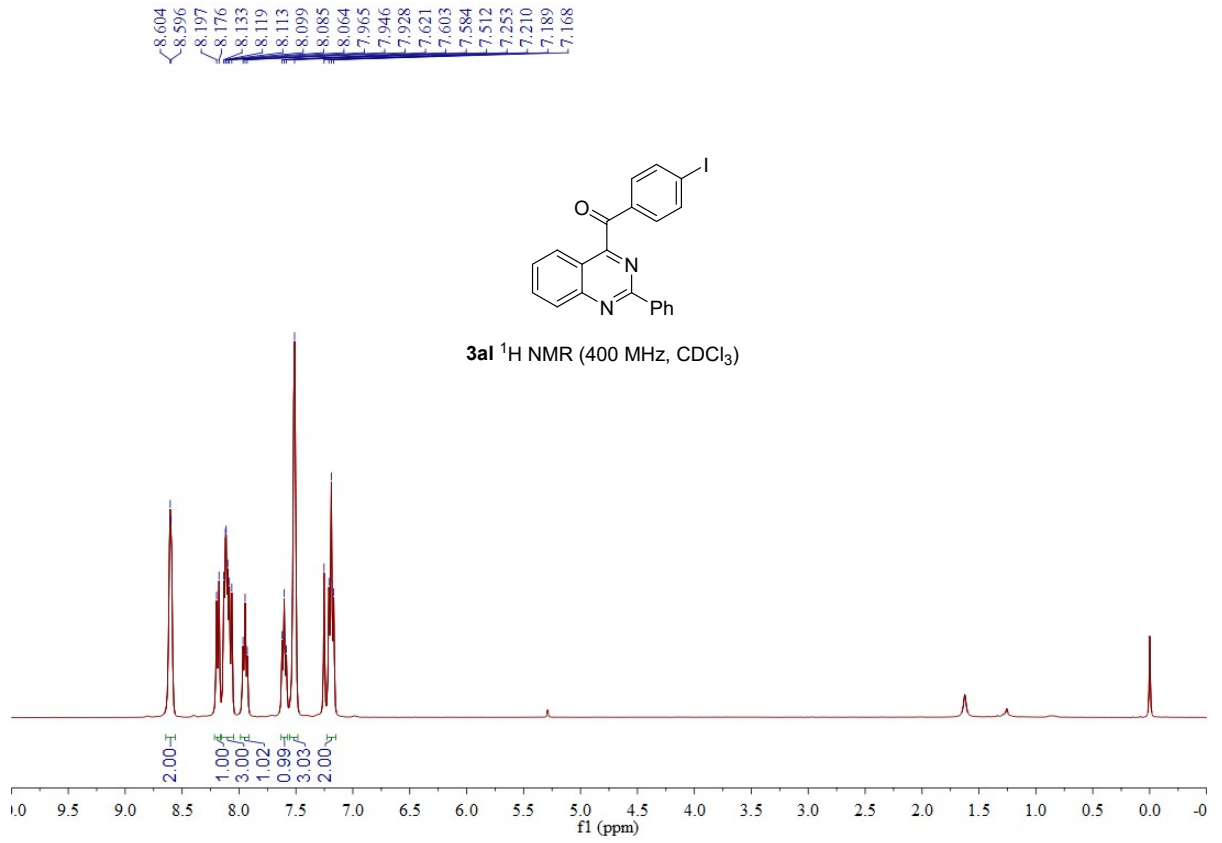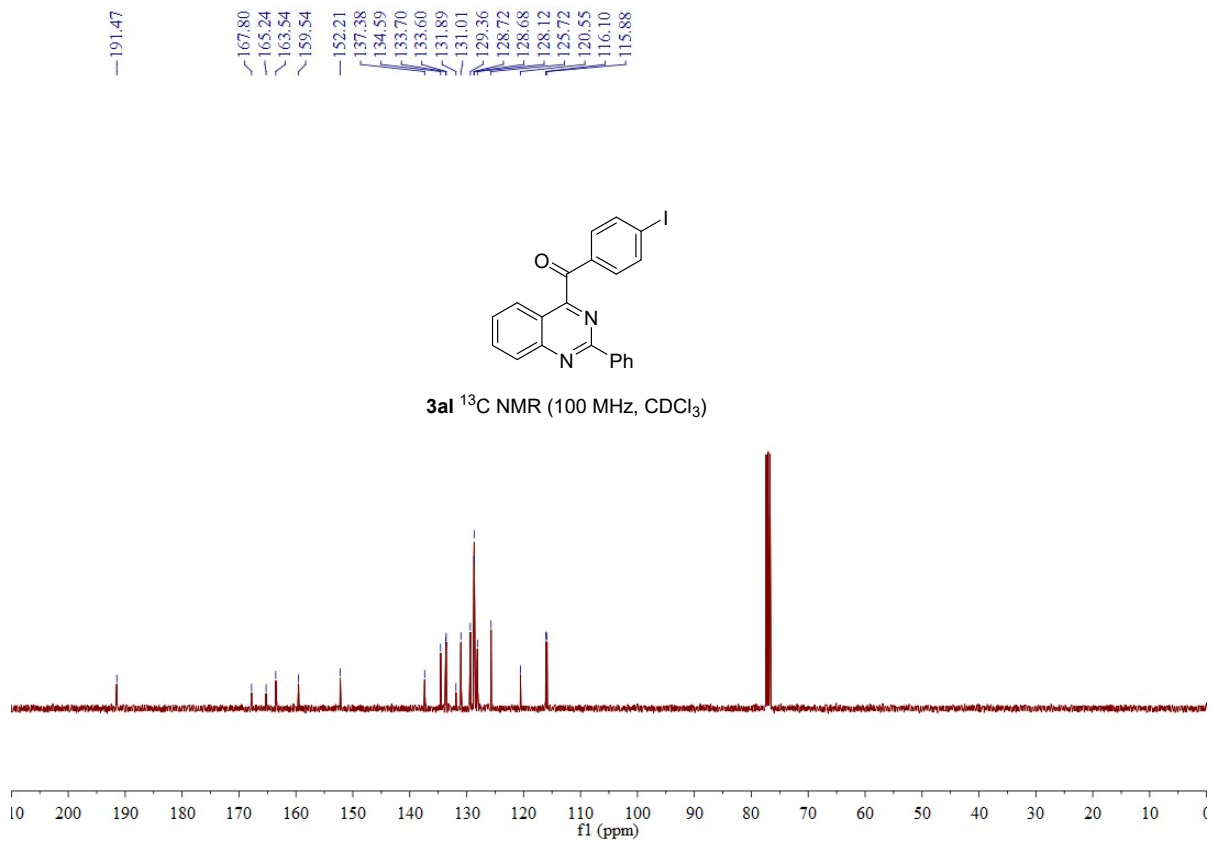

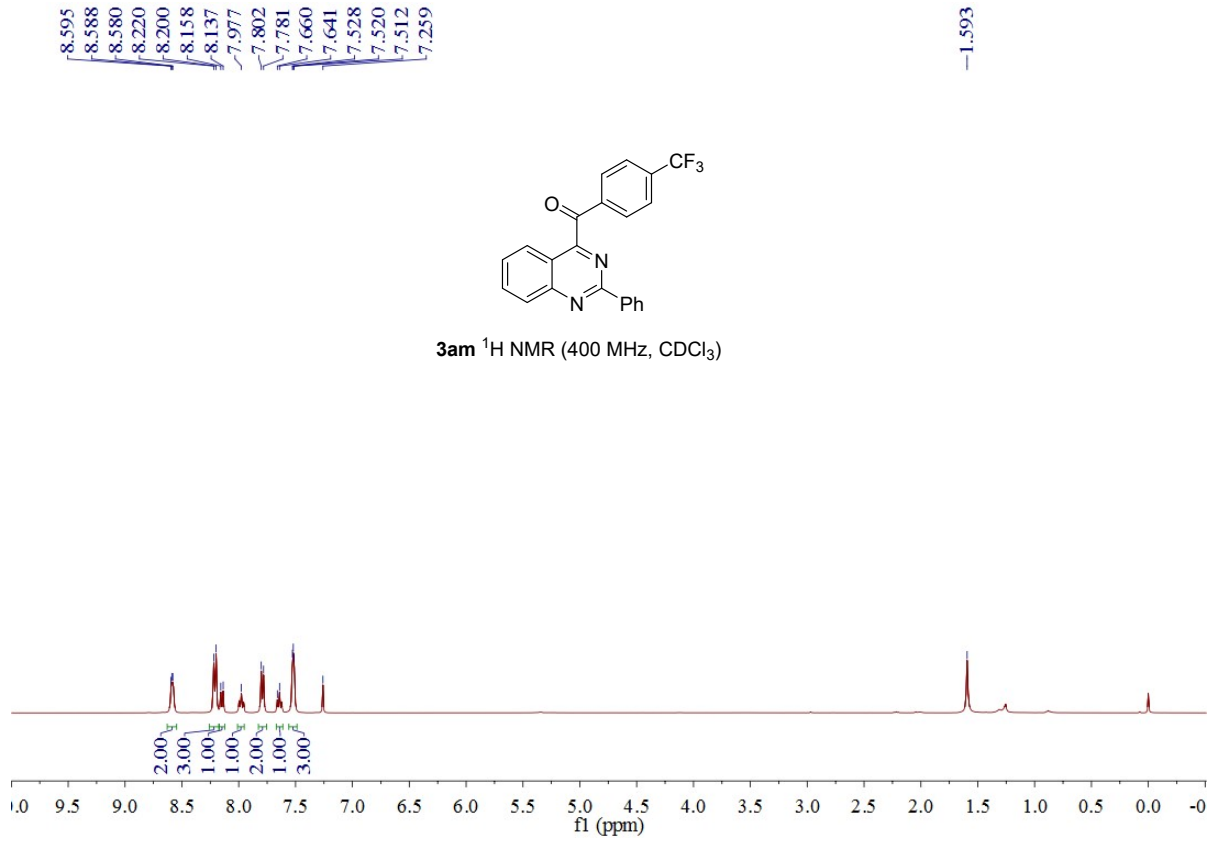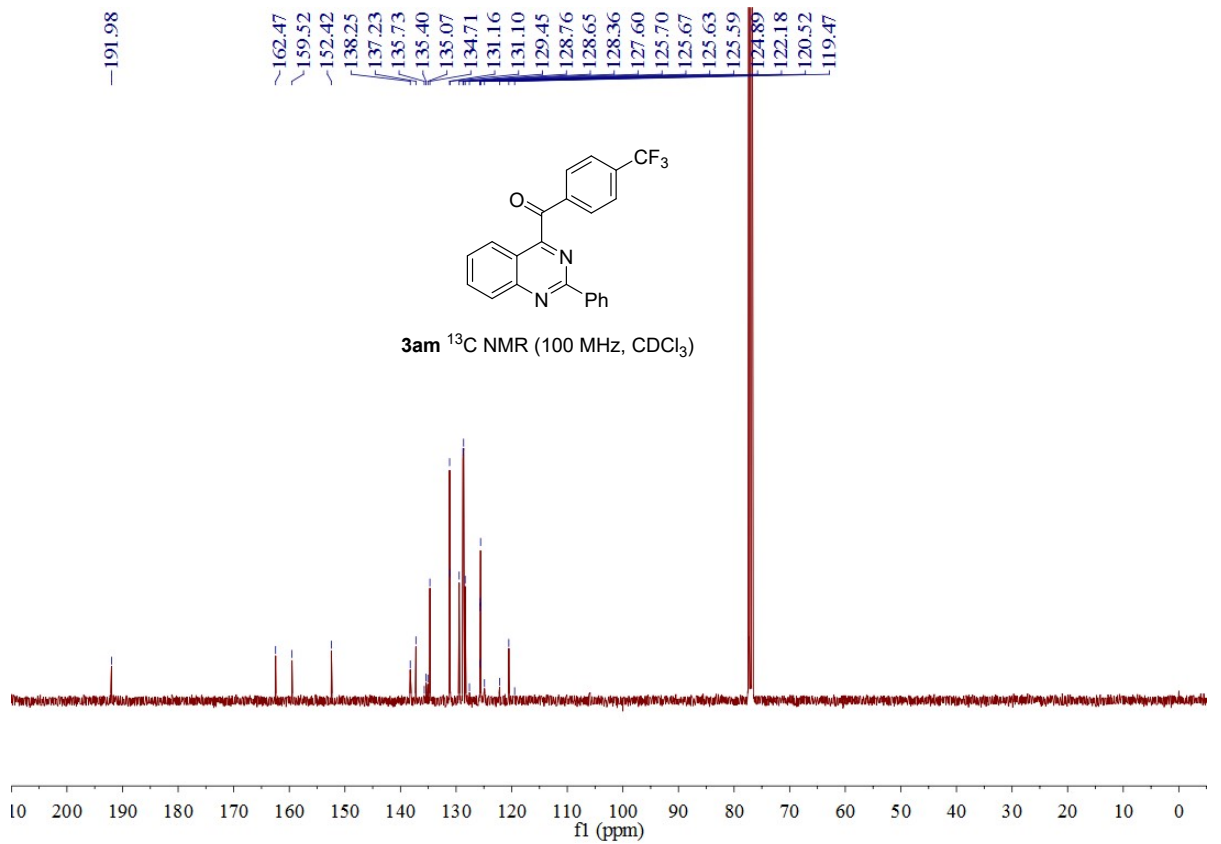

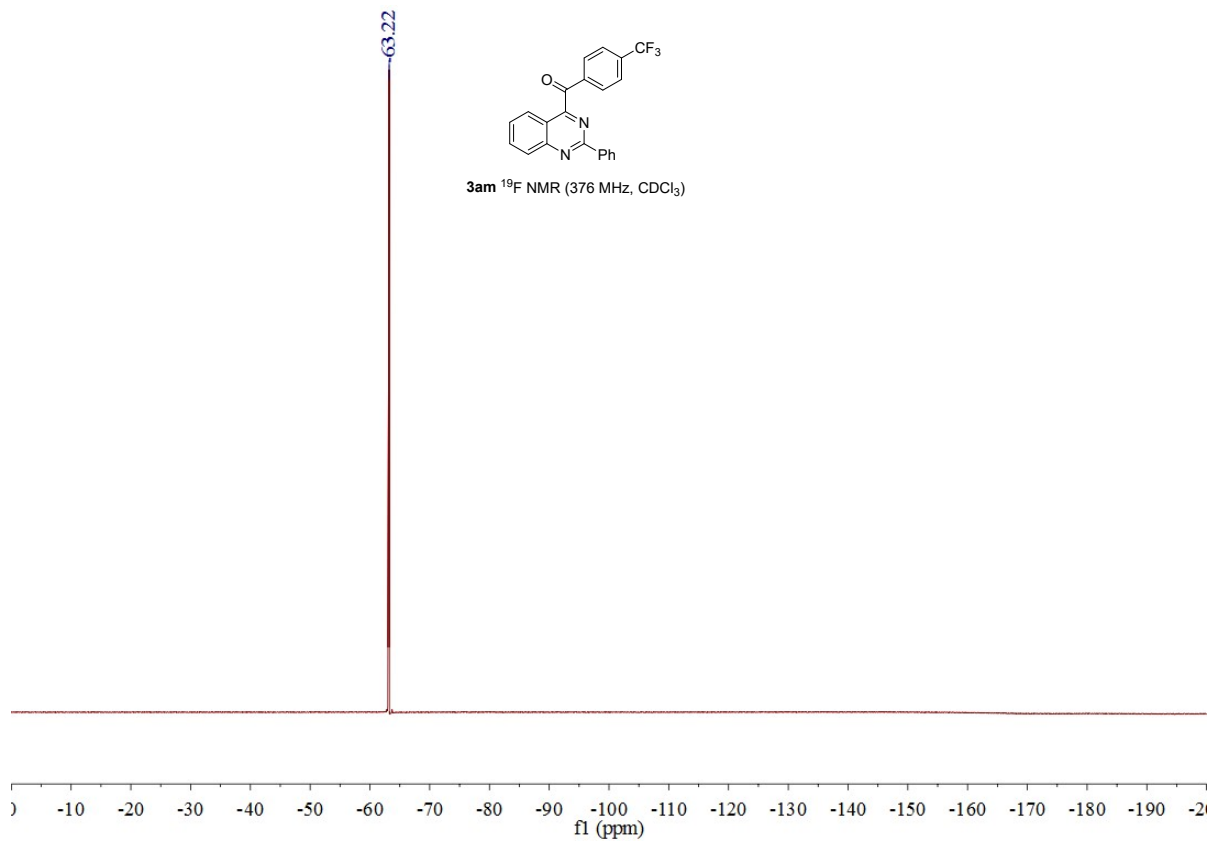



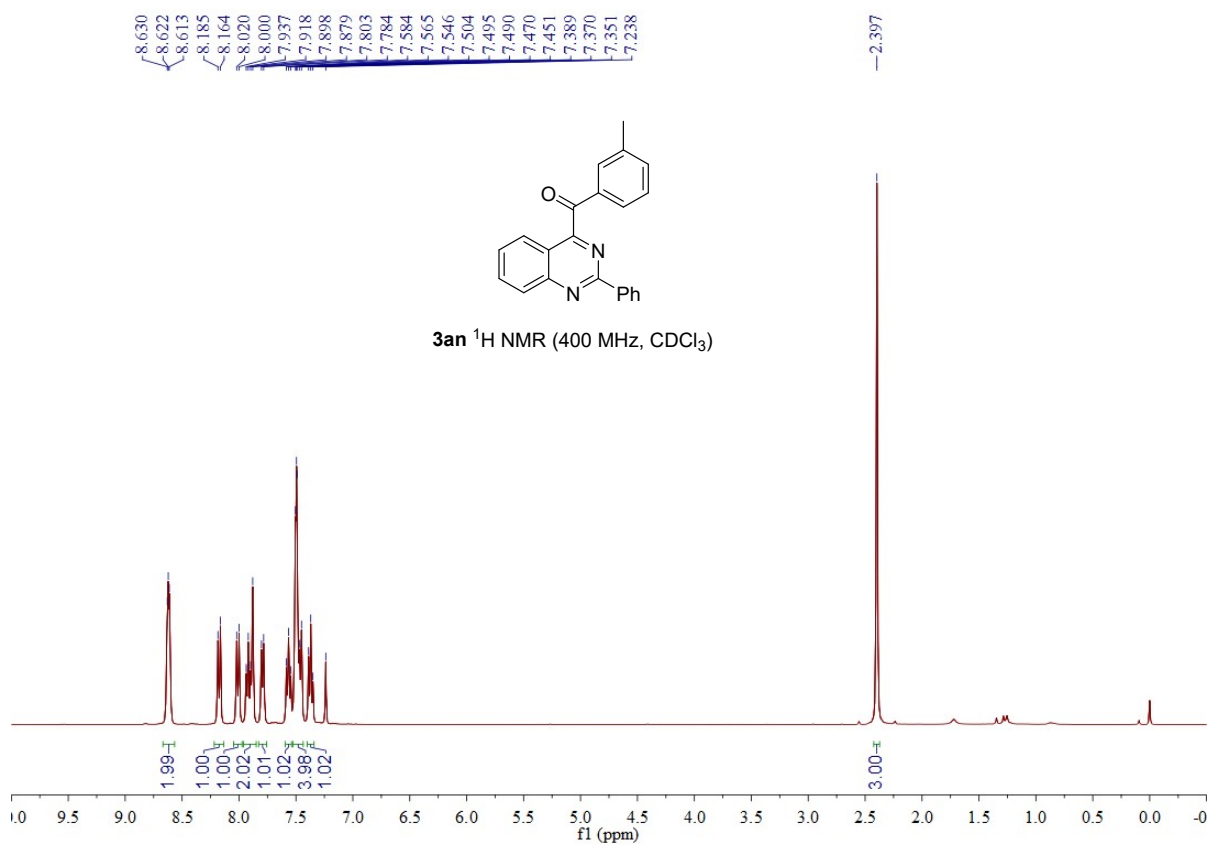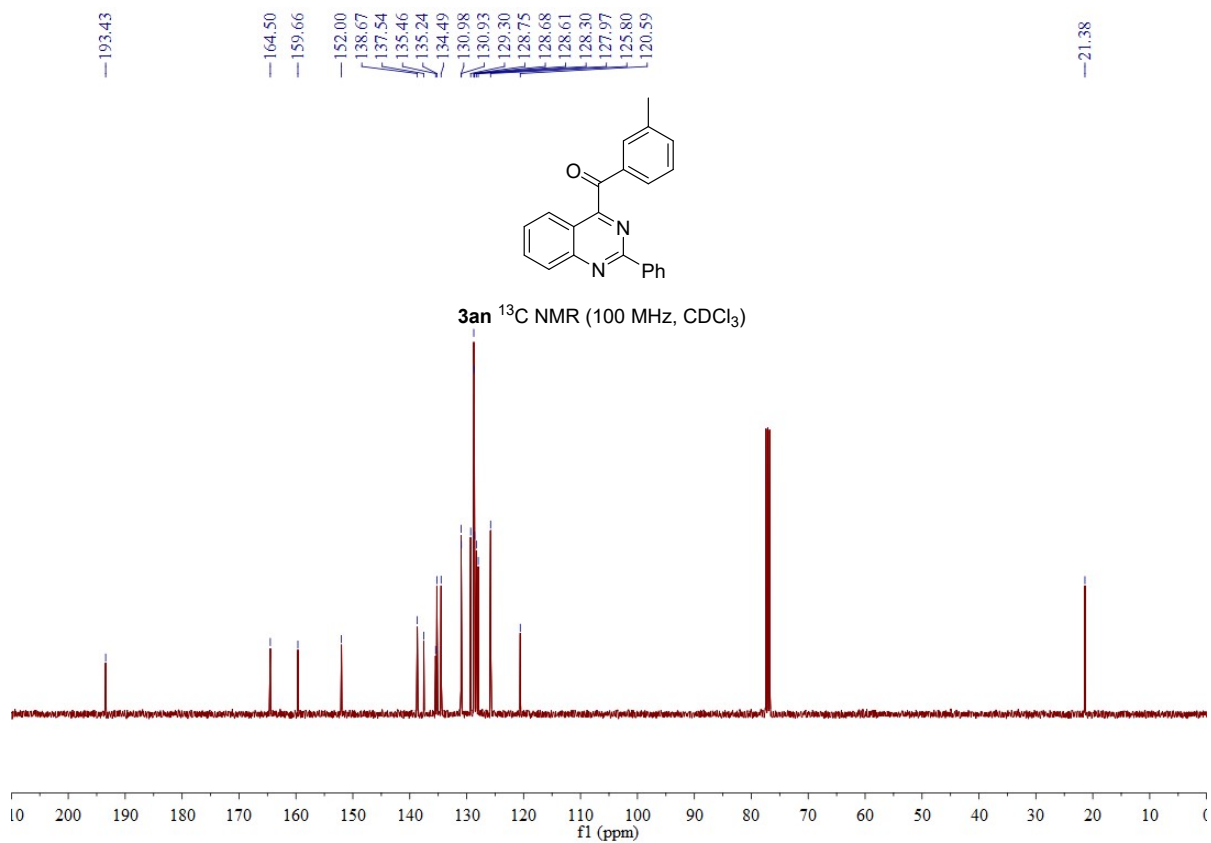

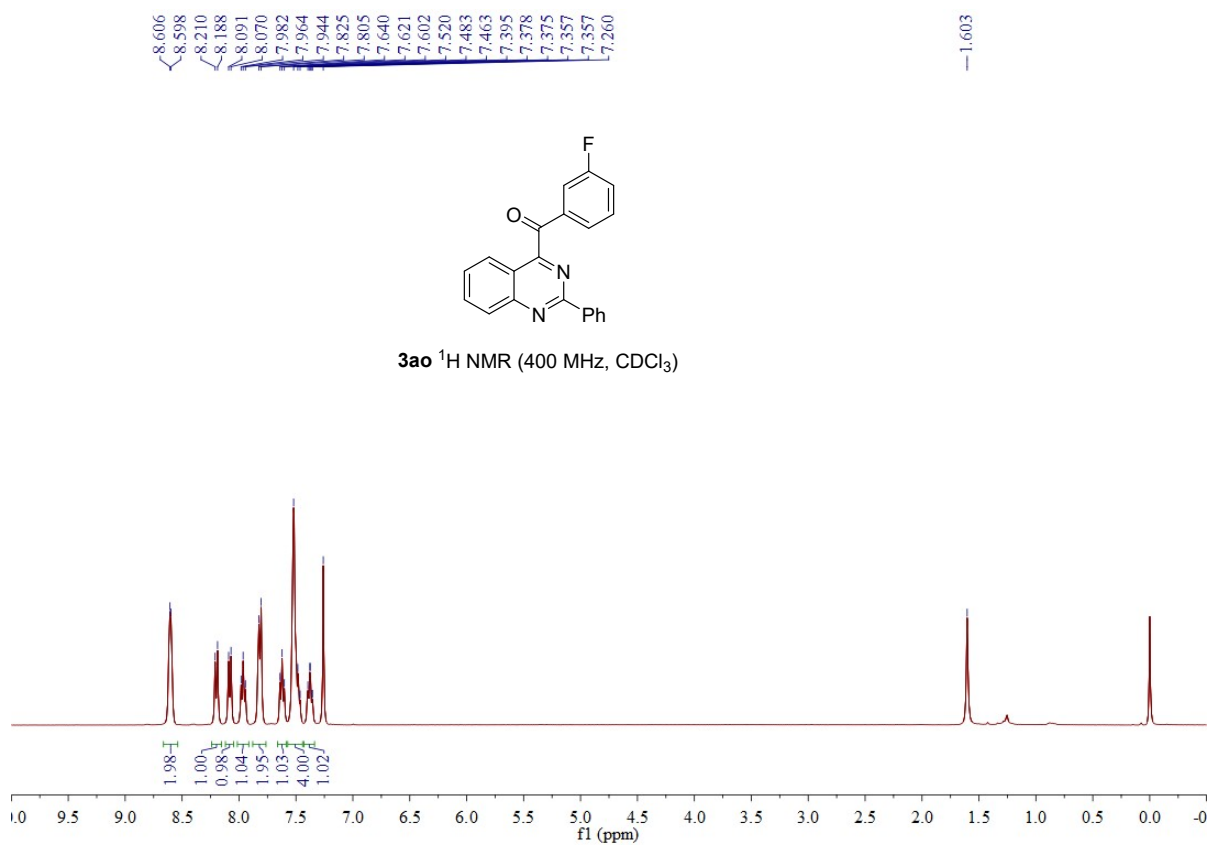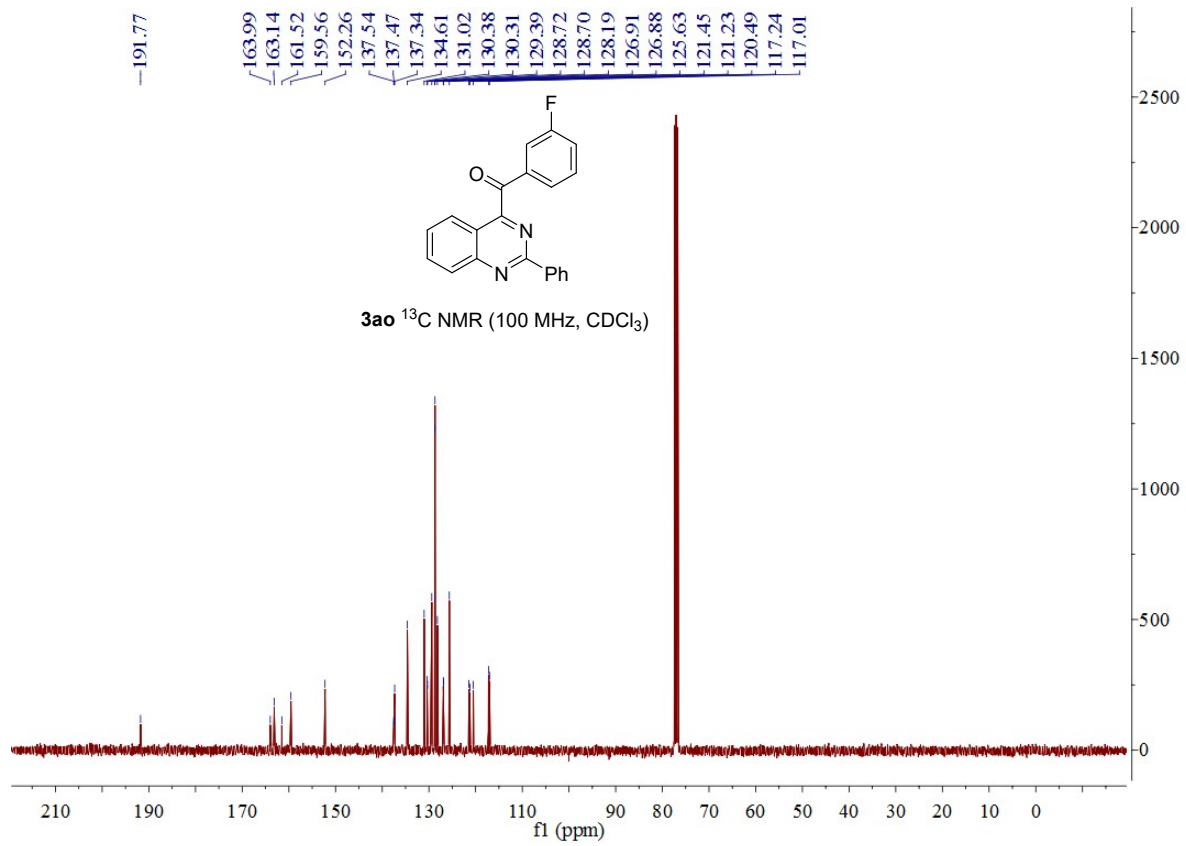

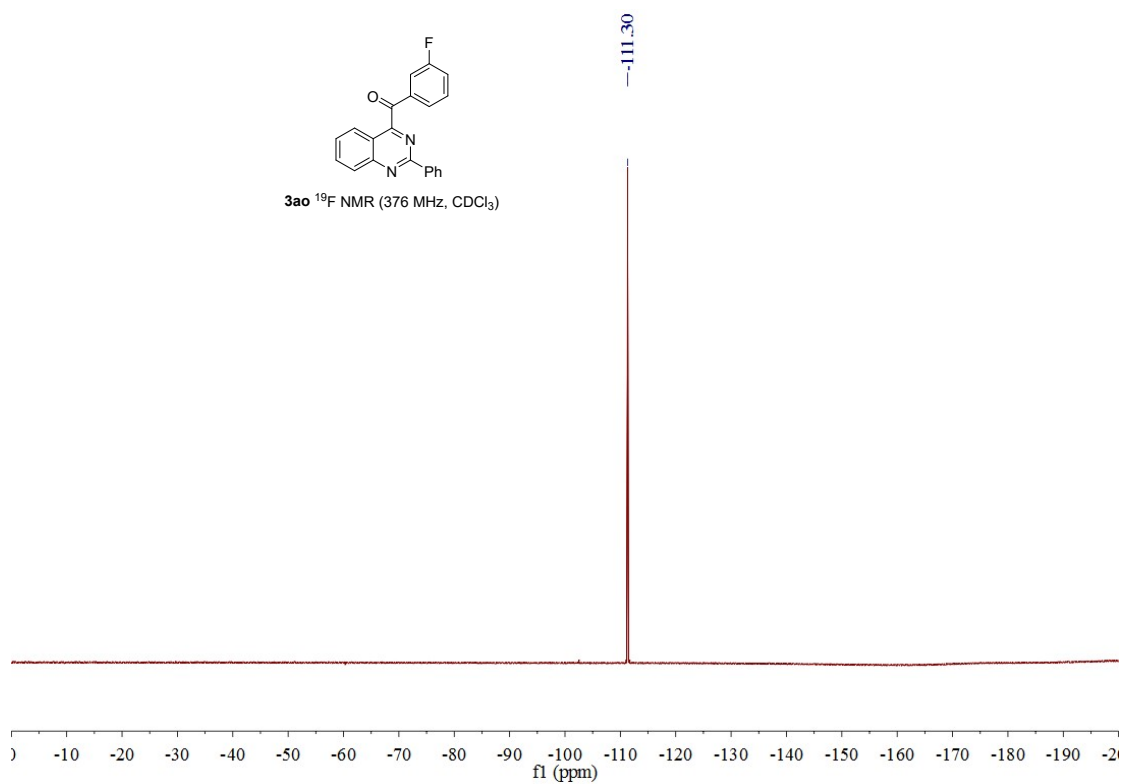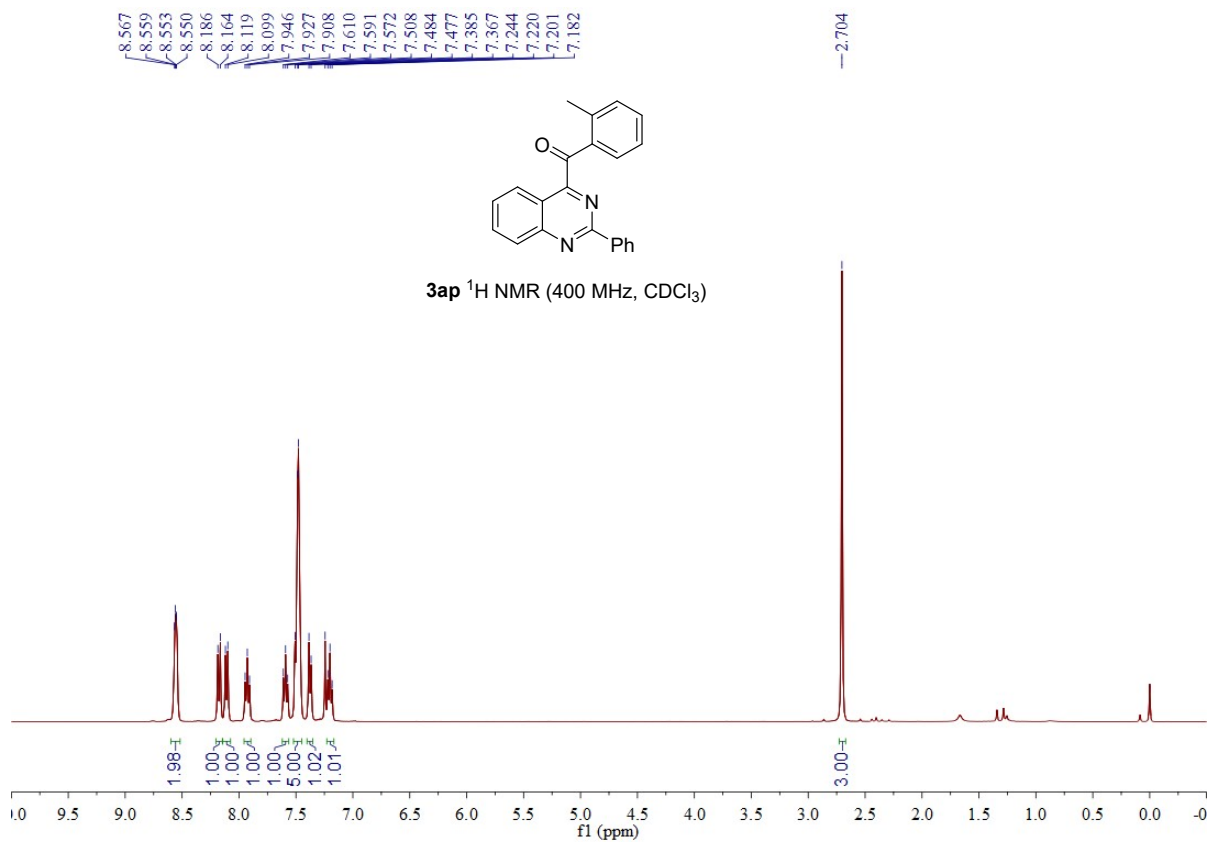

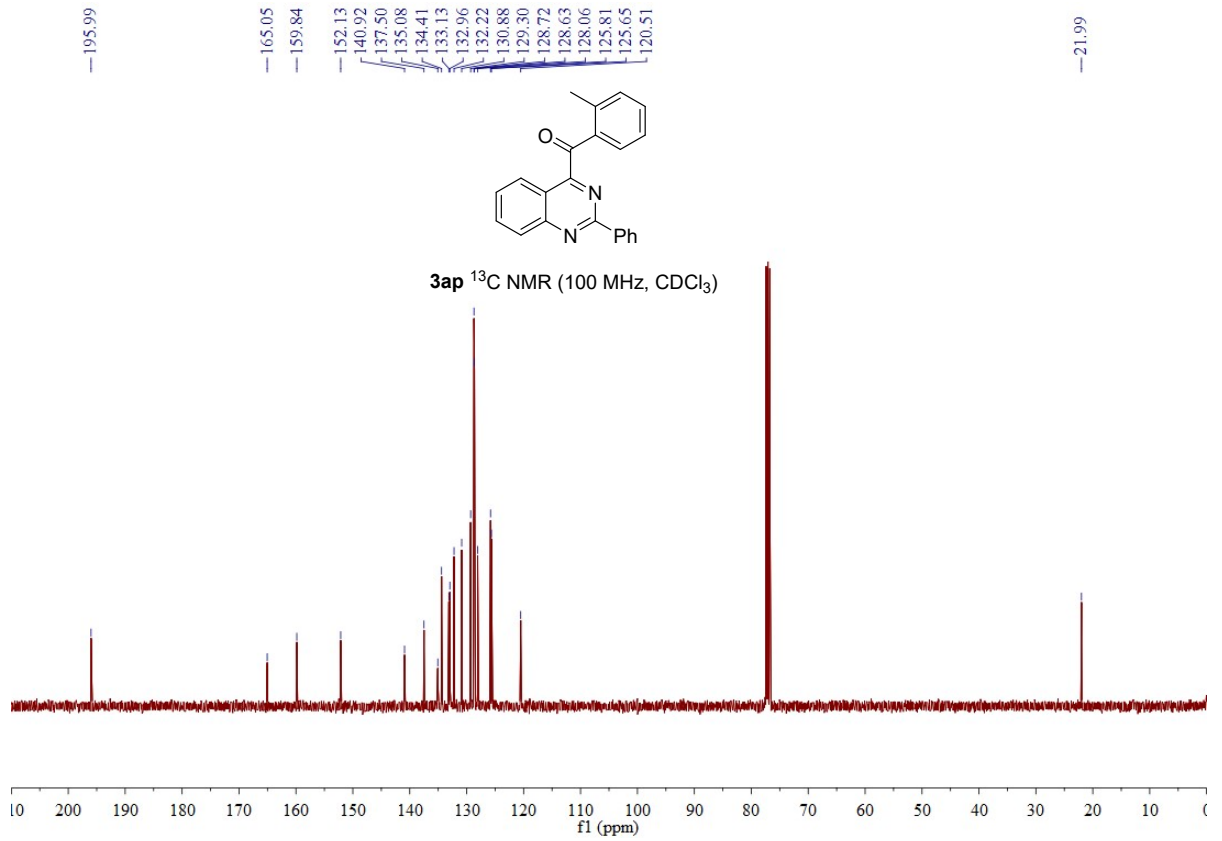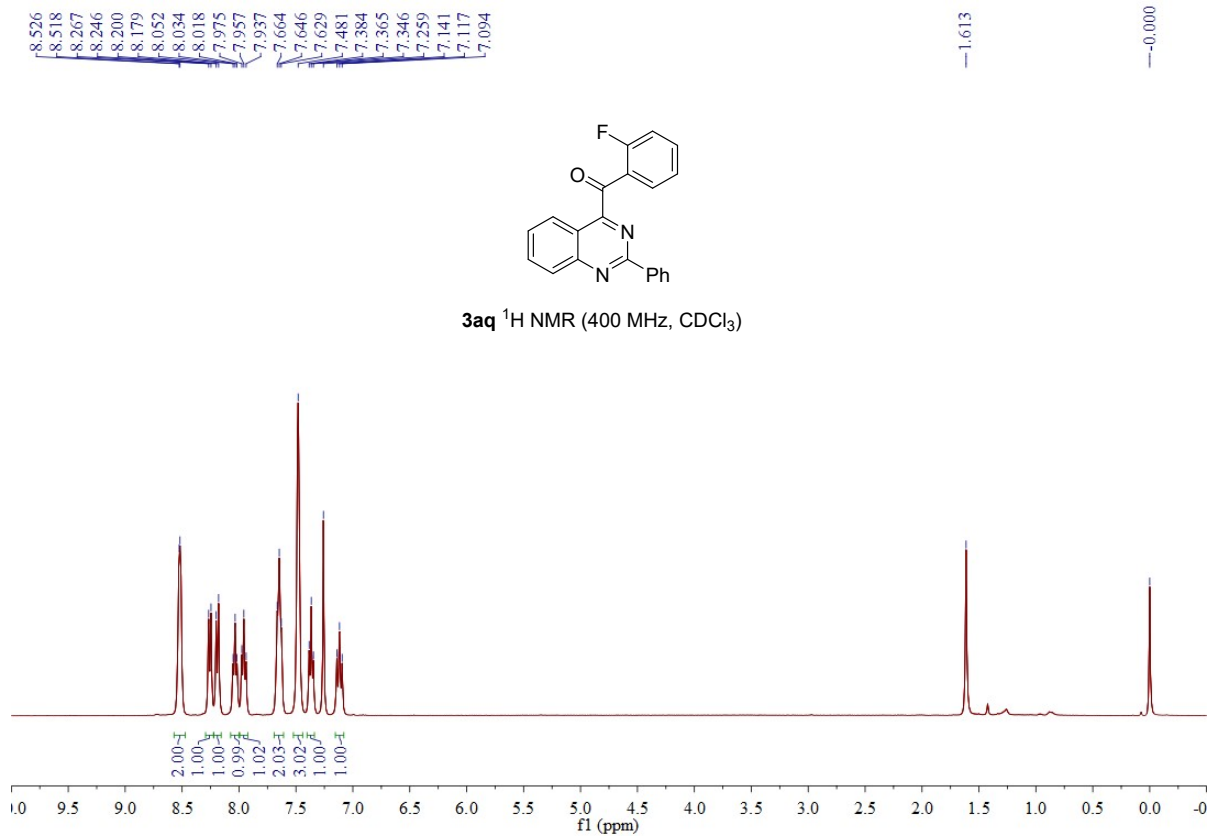

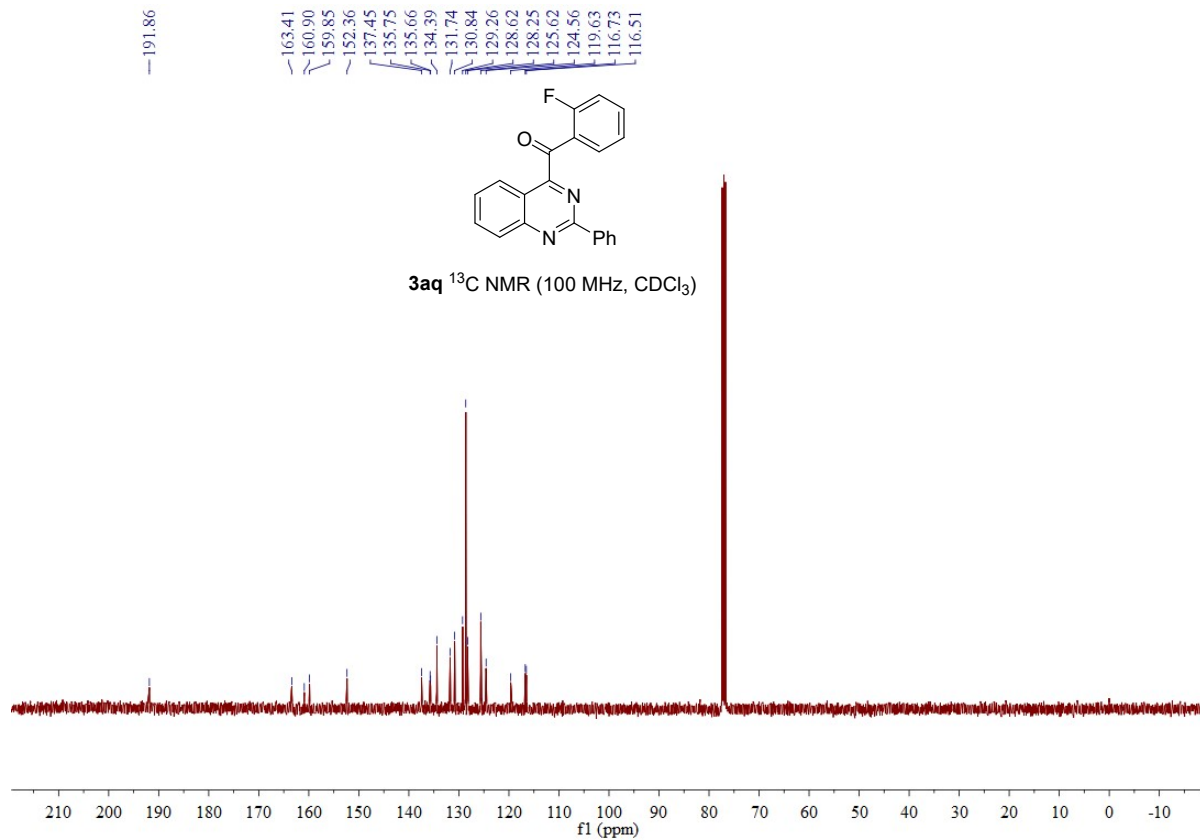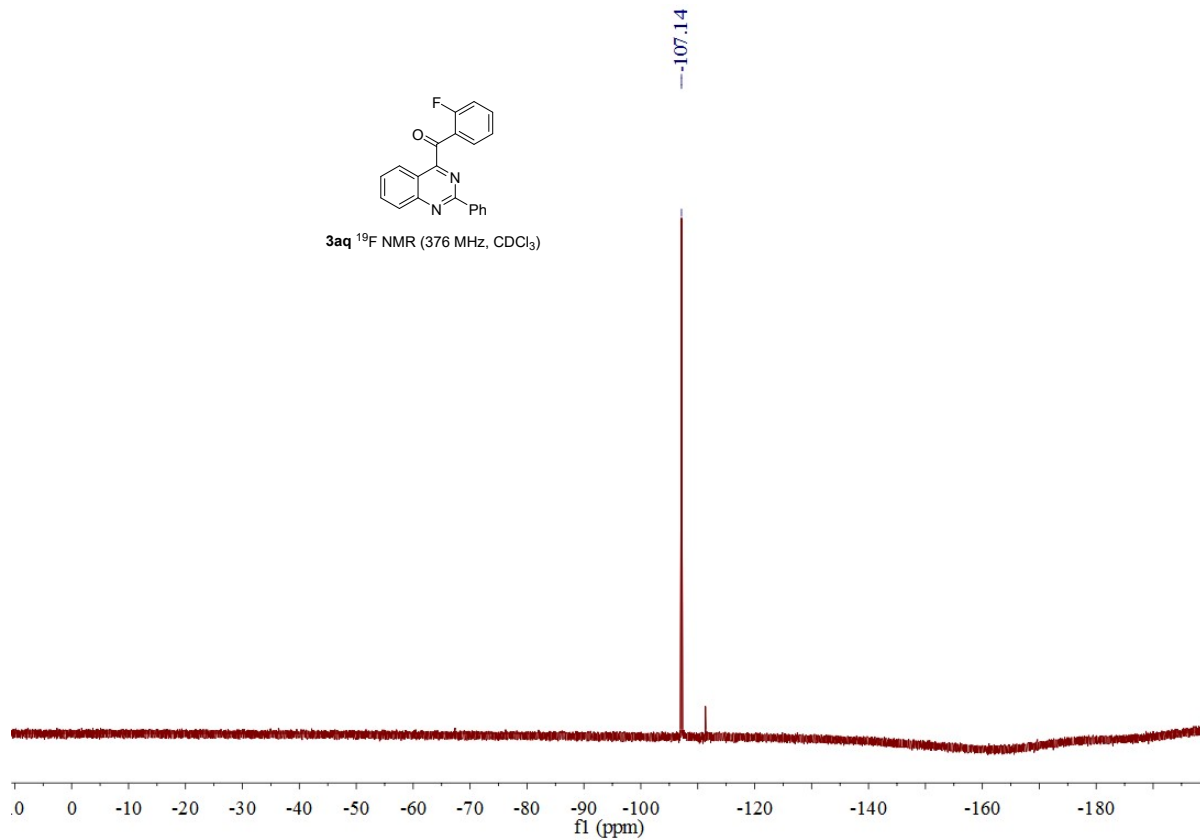

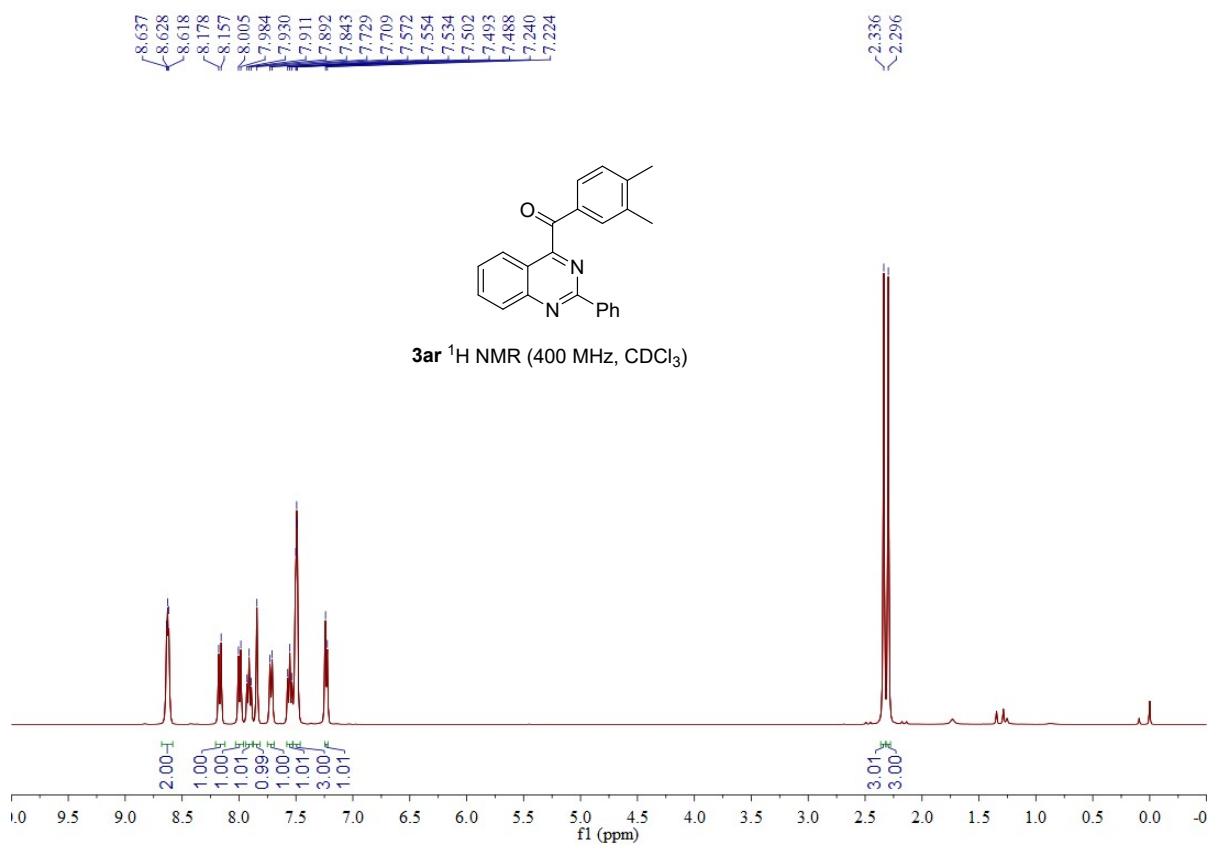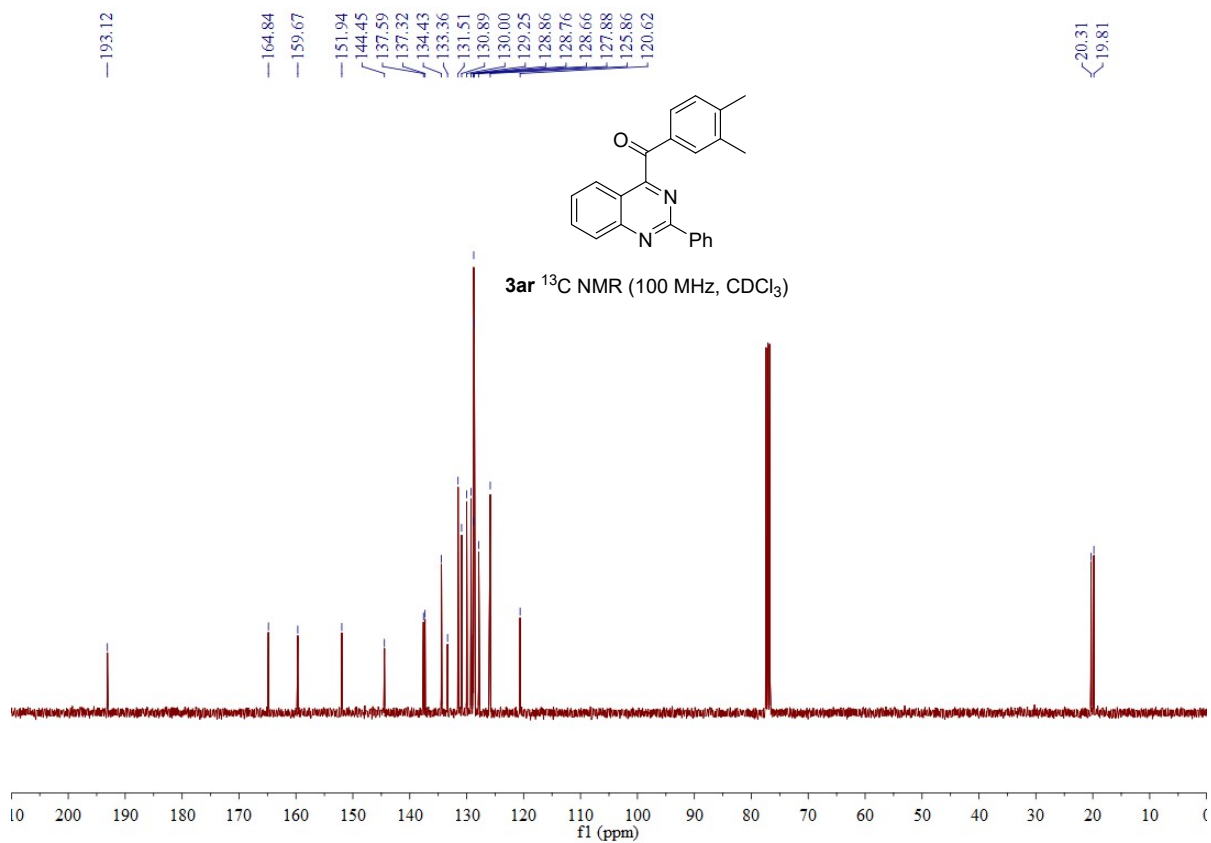

8.629  
8.620  
8.611  
8.160  
7.982  
7.612  
7.578  
7.533  
7.513  
7.458  
6.839  
-6.090

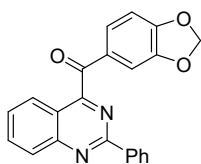

**3as**  $^1\text{H}$  NMR (400 MHz,  $\text{CDCl}_3$ )

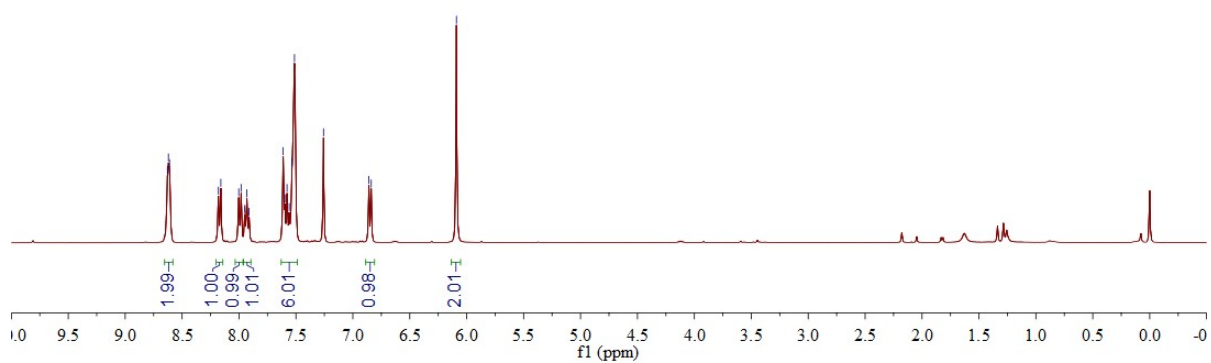

191.29  
164.67  
159.64  
153.09  
151.95  
148.44  
137.51  
134.48  
130.92  
130.22  
129.26  
128.73  
128.67  
127.90  
125.81  
120.58  
109.42  
108.16  
102.18

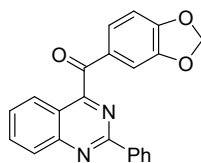

**3as**  $^{13}\text{C}$  NMR (100 MHz,  $\text{CDCl}_3$ )

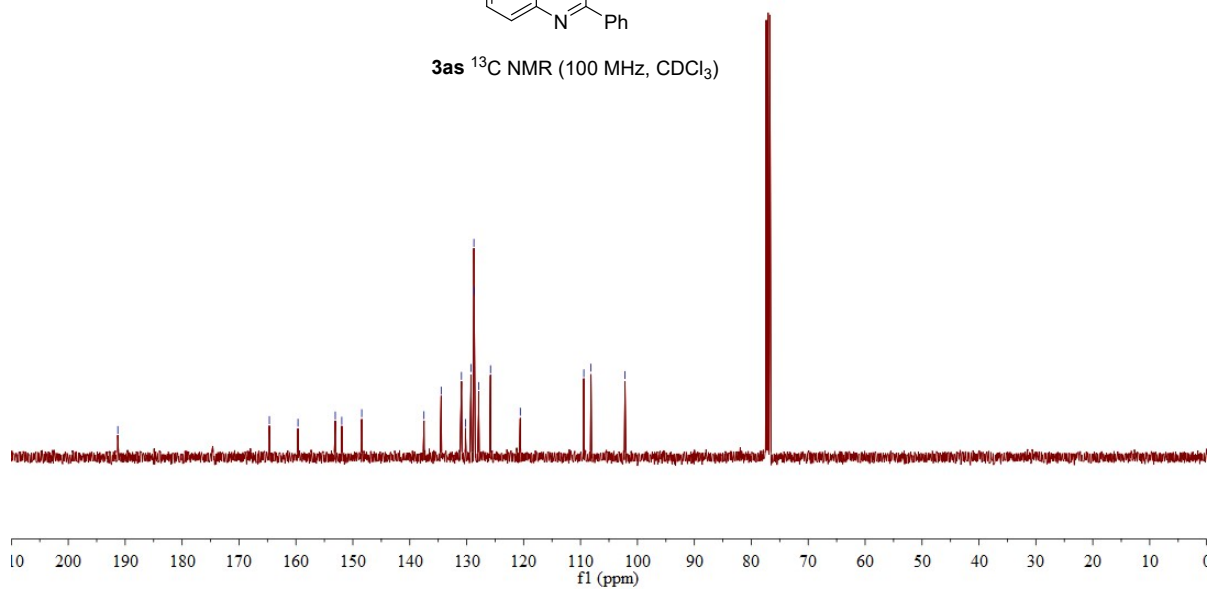

8.649  
8.641  
8.635  
8.441  
8.228  
8.210  
8.093  
8.072  
7.999  
7.977  
7.957  
7.930  
7.909  
7.868  
7.847  
7.657  
7.639  
7.616  
7.595  
7.575  
7.546  
7.526  
7.510  
7.504  
7.254

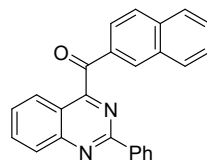

**3at**  $^1\text{H}$  NMR (400 MHz,  $\text{CDCl}_3$ )

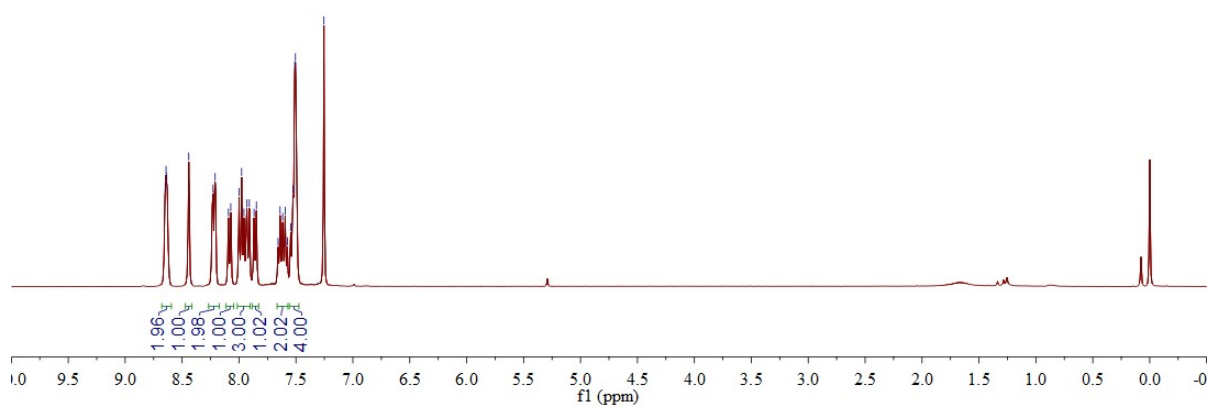

193.17  
164.40  
159.70  
152.11  
137.52  
136.17  
134.55  
134.21  
132.82  
132.37  
130.95  
130.02  
129.33  
128.74  
128.71  
128.03  
127.90  
127.01  
125.86  
124.90  
120.73

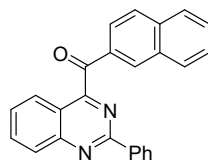

**3at**  $^{13}\text{C}$  NMR (100 MHz,  $\text{CDCl}_3$ )

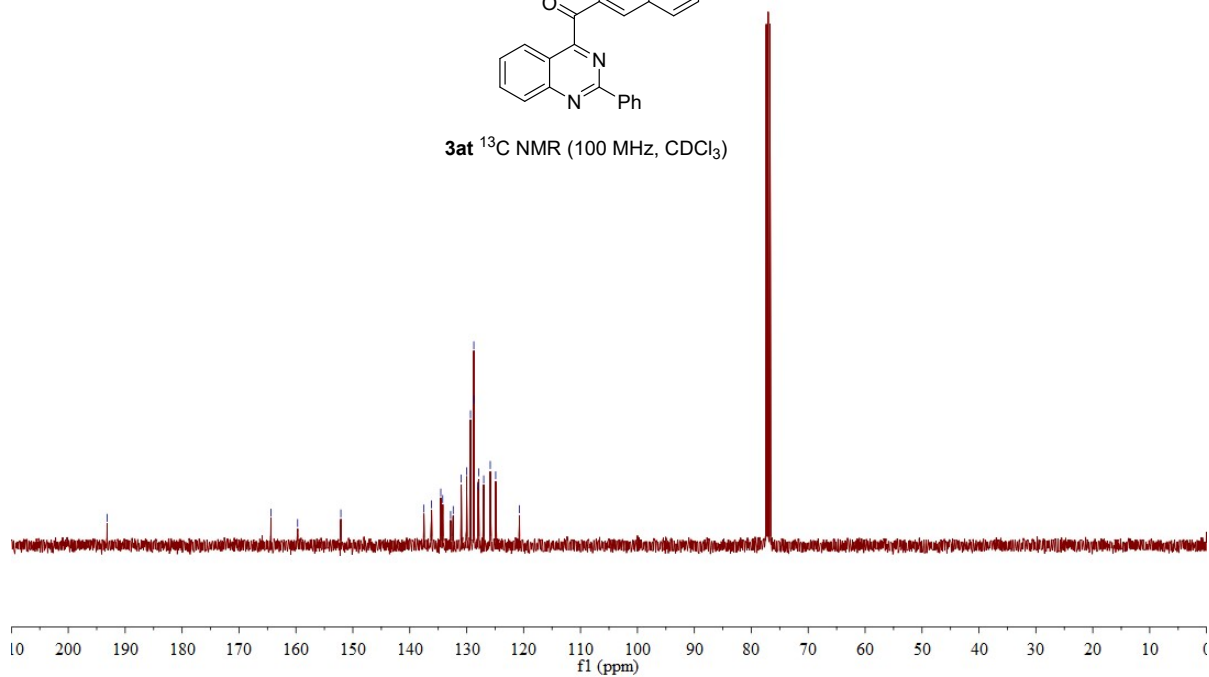



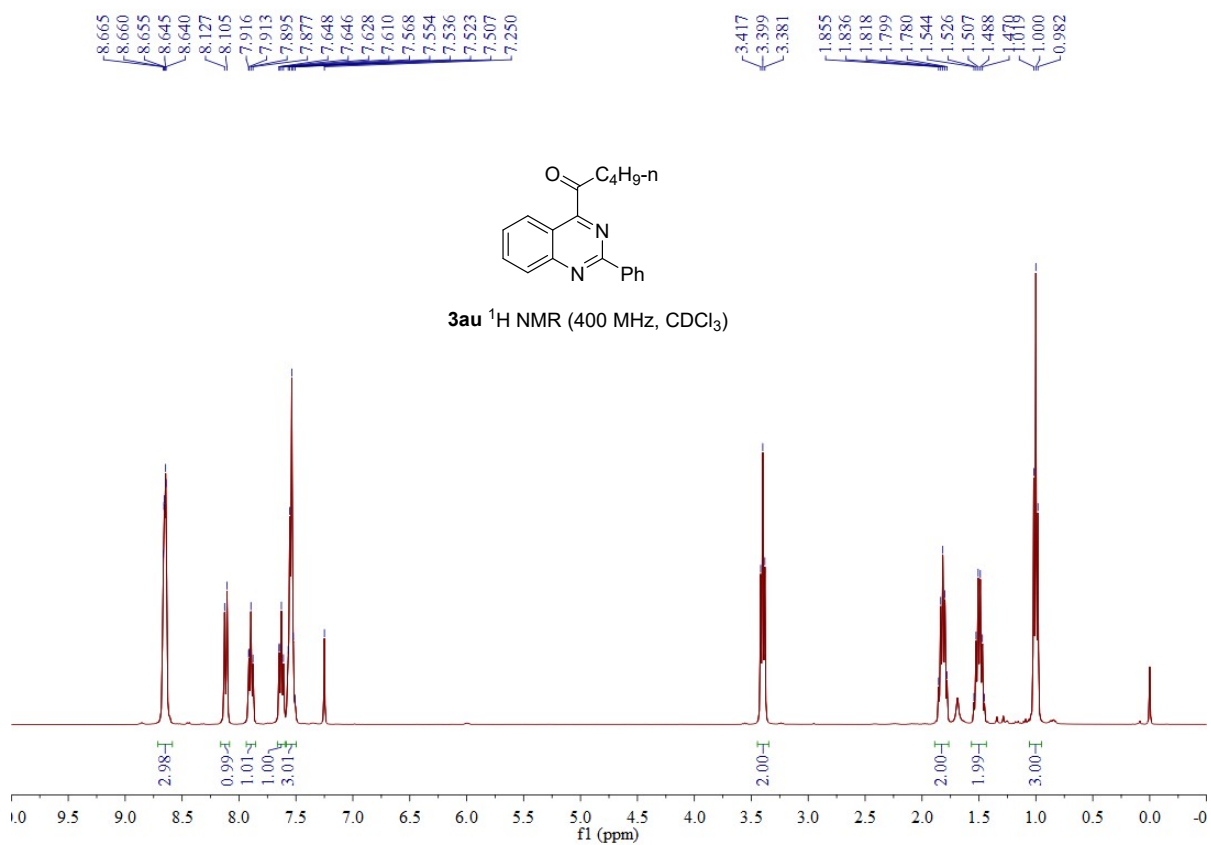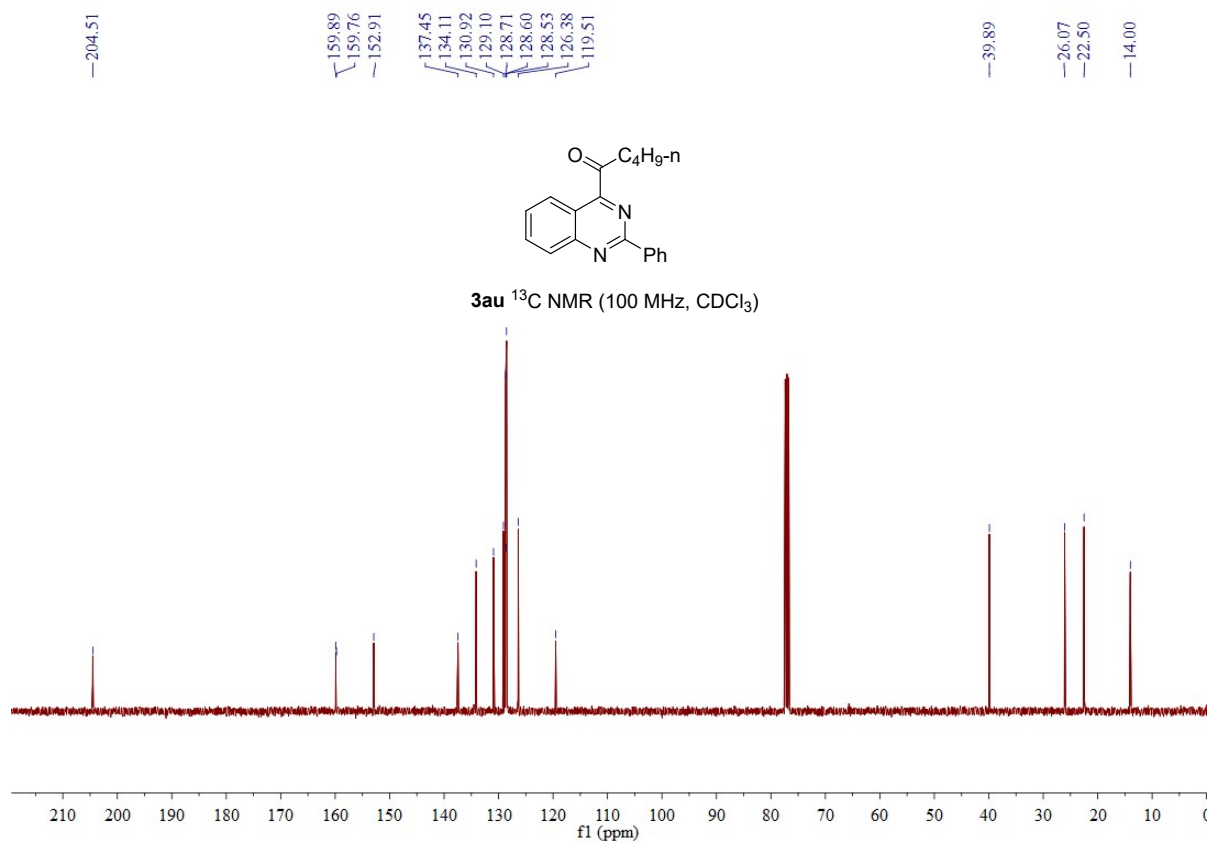

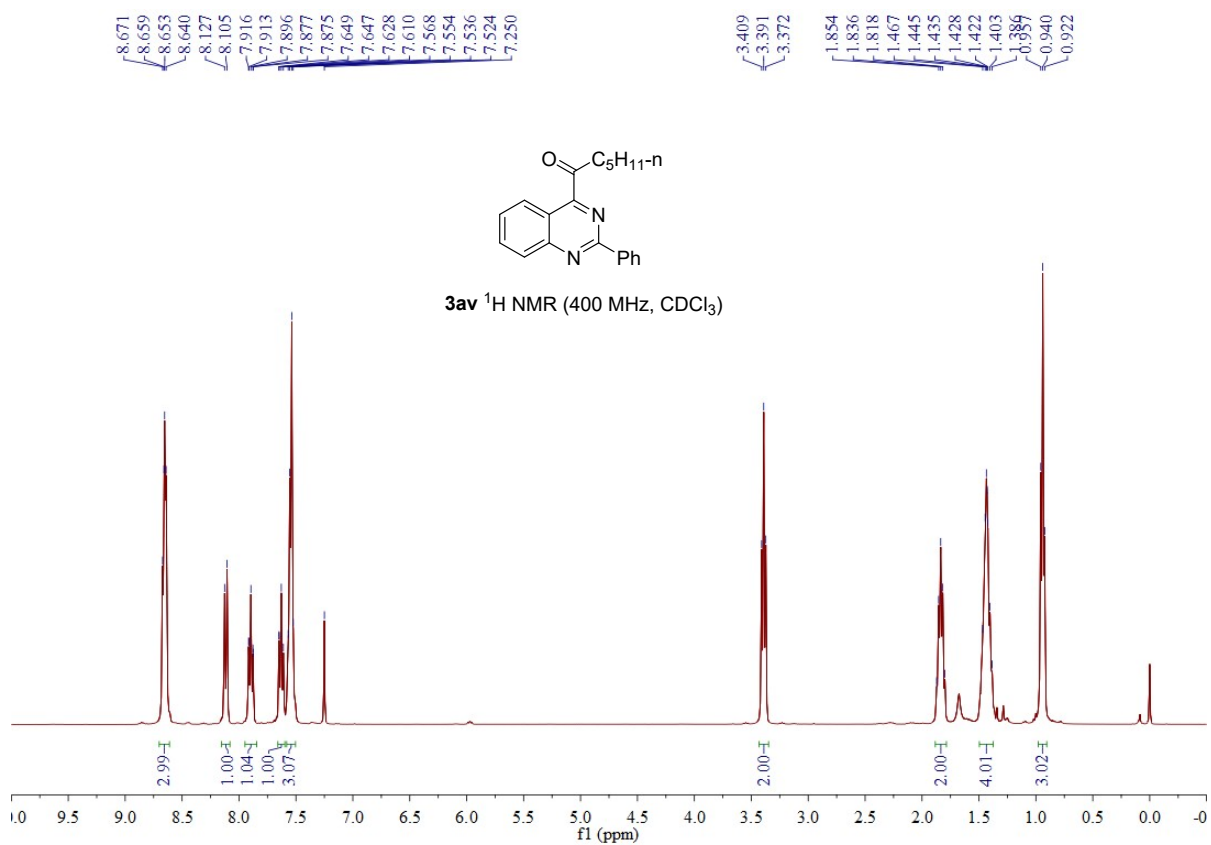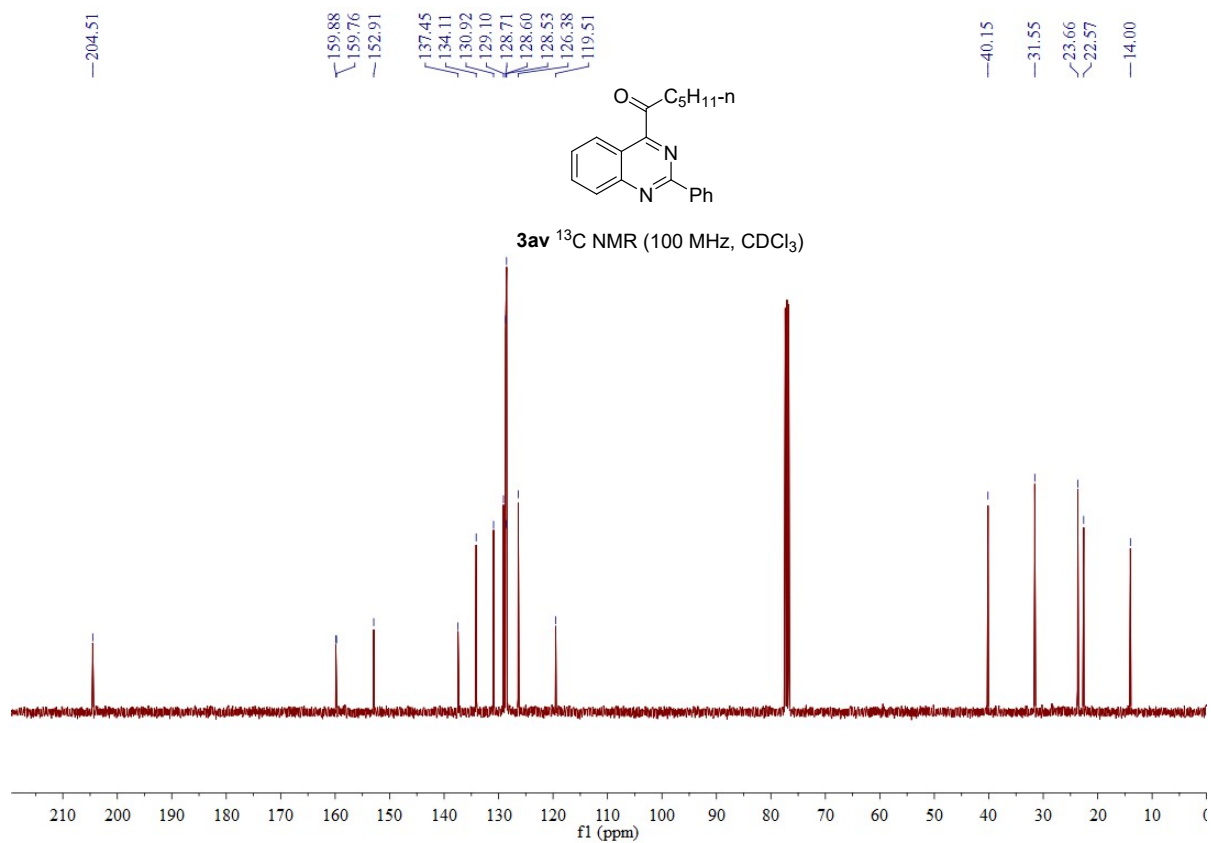

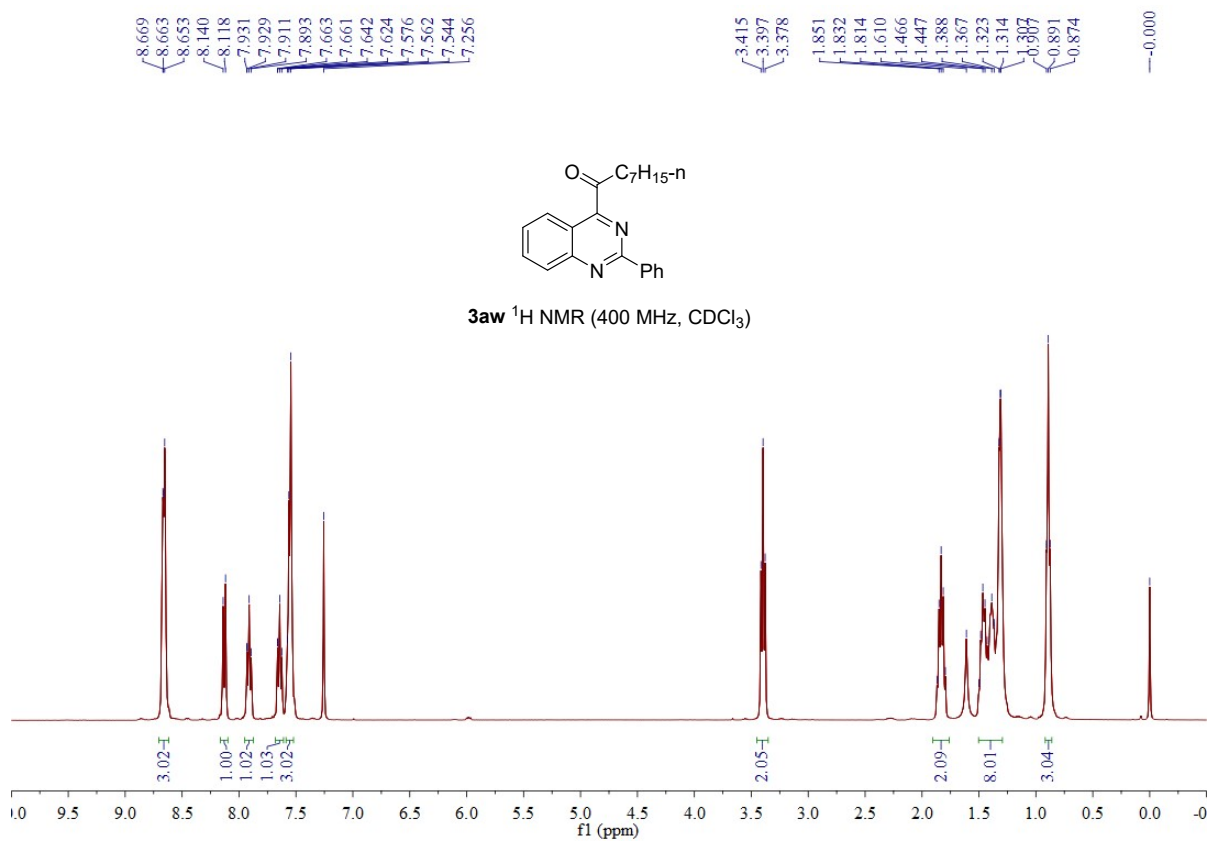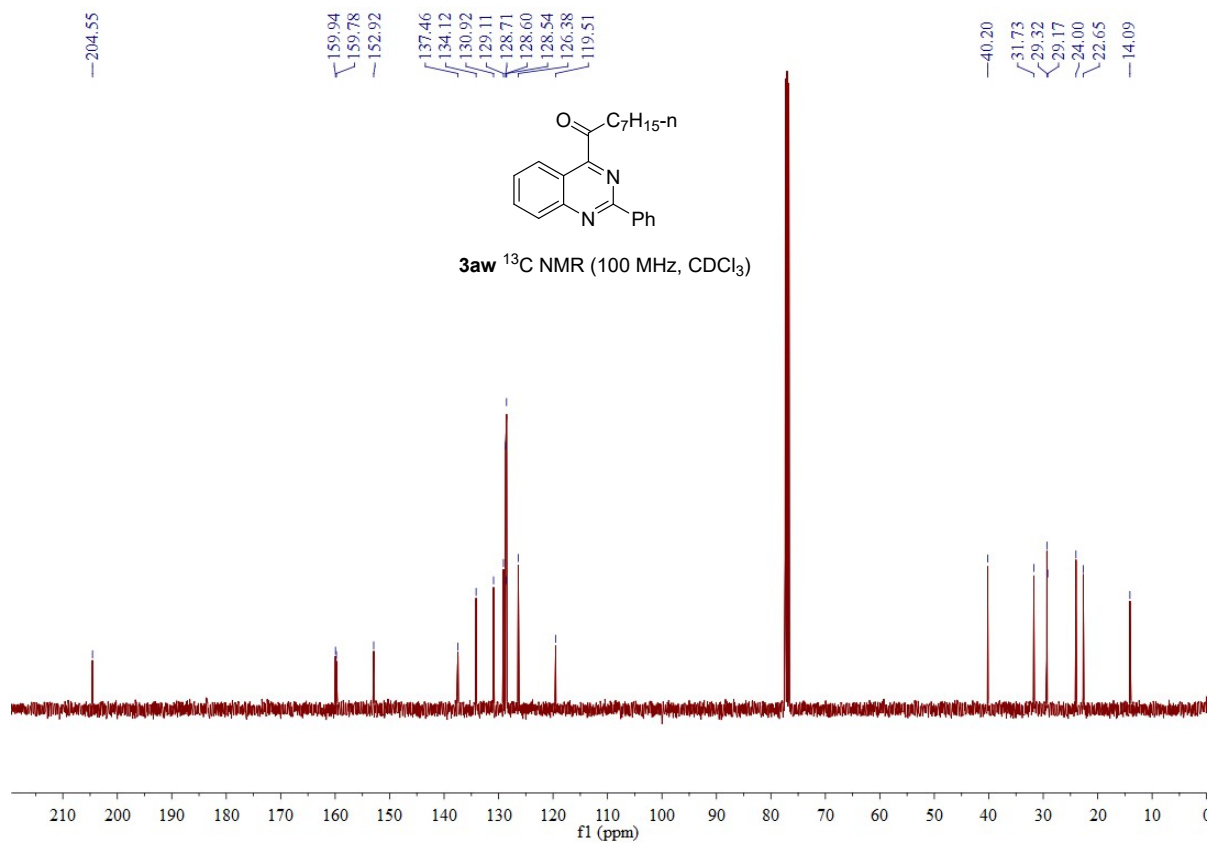

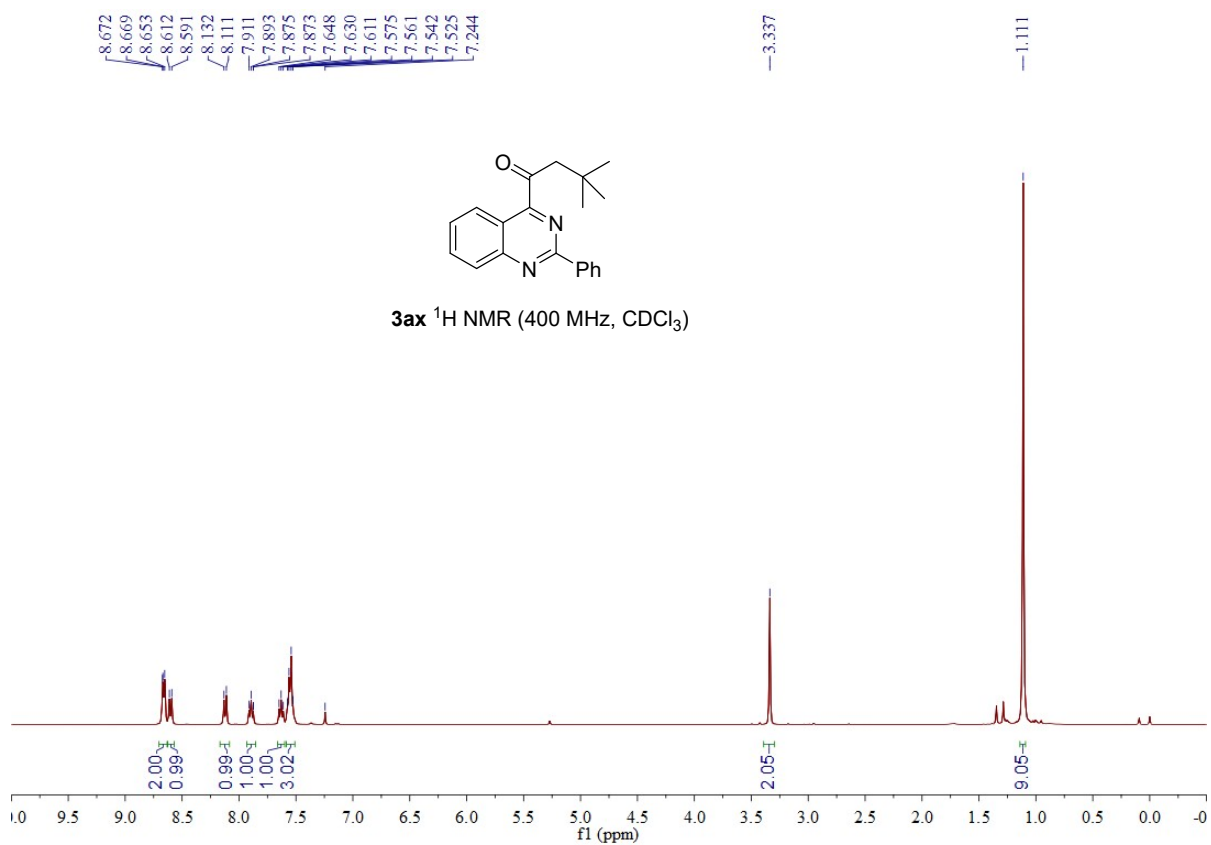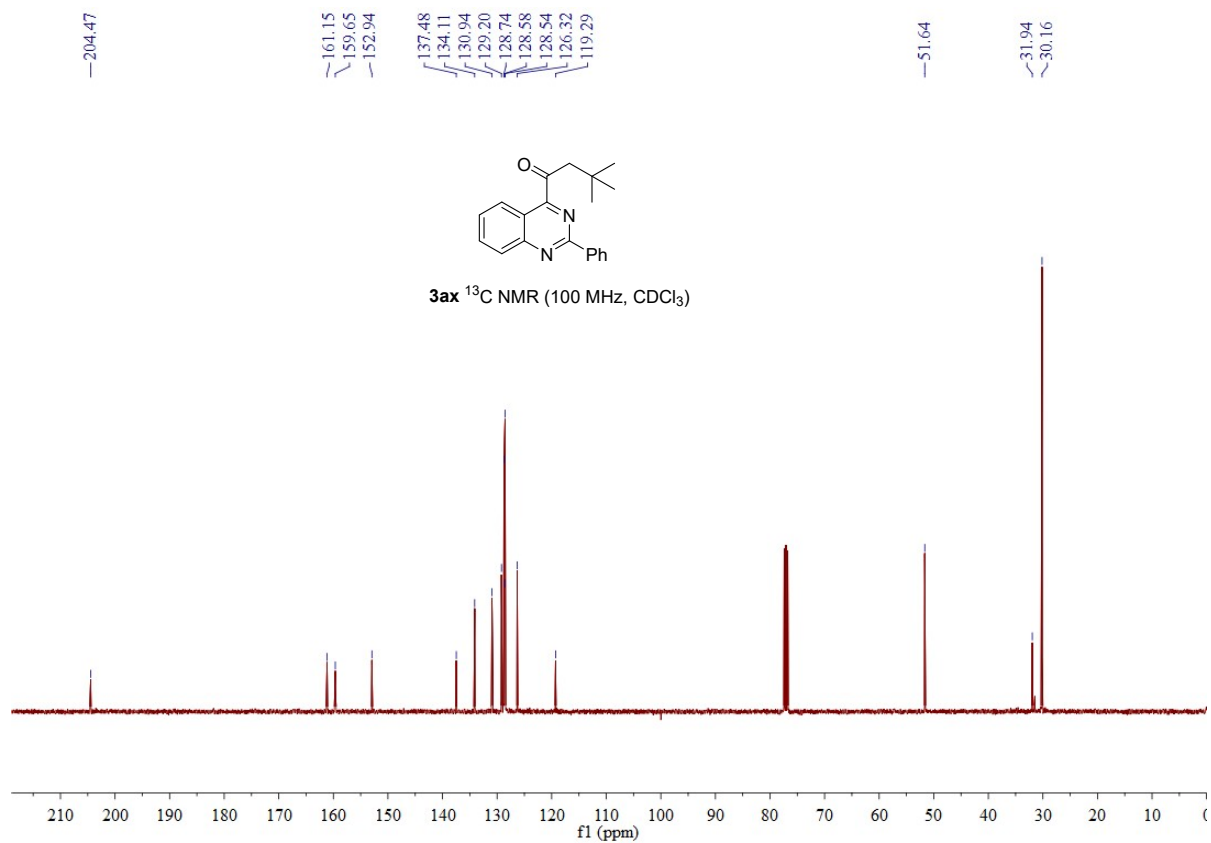

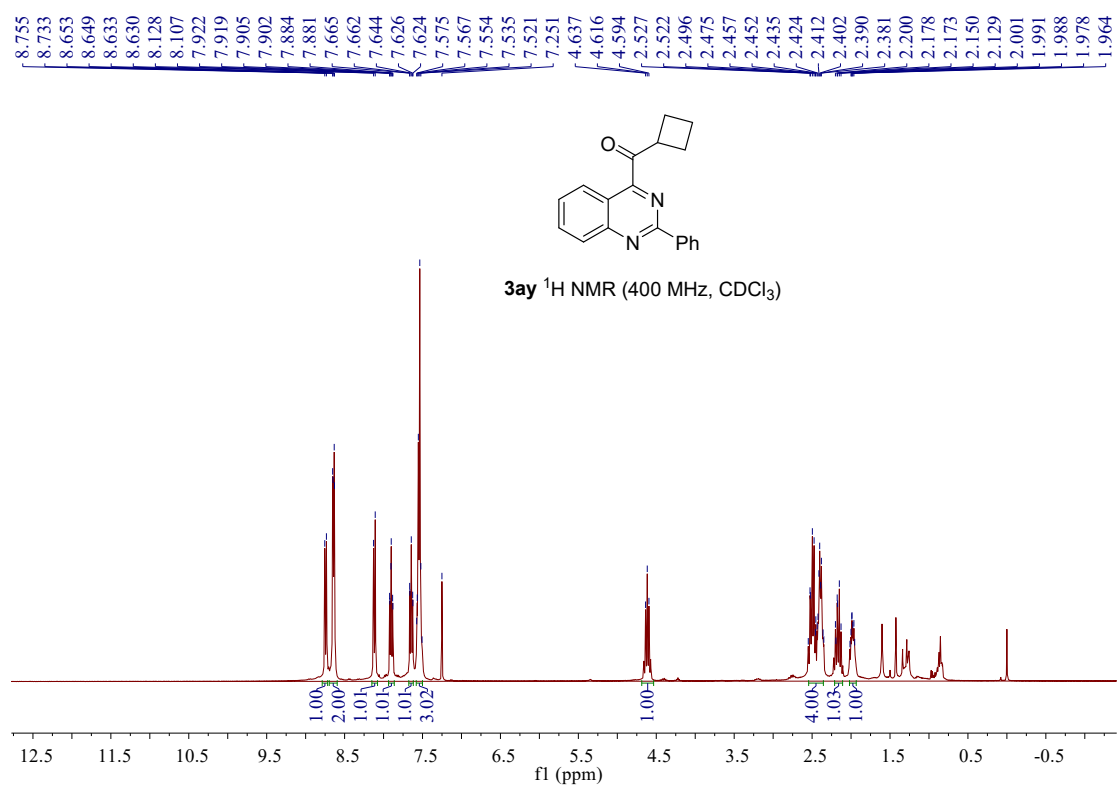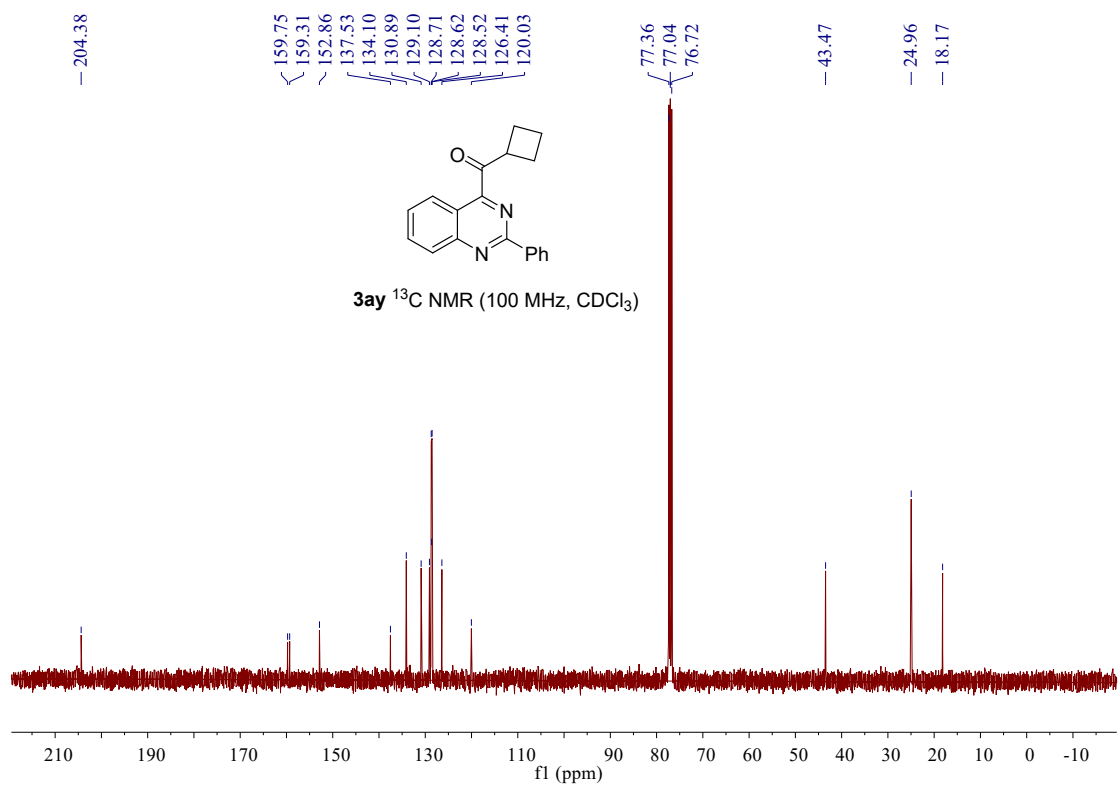

8.662, 8.658, 8.642, 8.473, 8.452, 8.129, 8.108, 7.912, 7.910, 7.892, 7.874, 7.871, 7.631, 7.628, 7.610, 7.592, 7.590, 7.572, 7.557, 7.538, 7.520, 3.893, 3.885, 3.874, 3.866, 3.858, 3.847, 3.838, 3.830, 2.026, 1.999, 1.872, 1.864, 1.840, 1.763, 1.731, 1.568, 1.535, 1.503, 1.470, 1.439, 1.348, 1.342, 1.318, 1.285

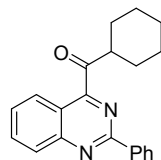

**3az** <sup>1</sup>H NMR (400 MHz, CDCl<sub>3</sub>)

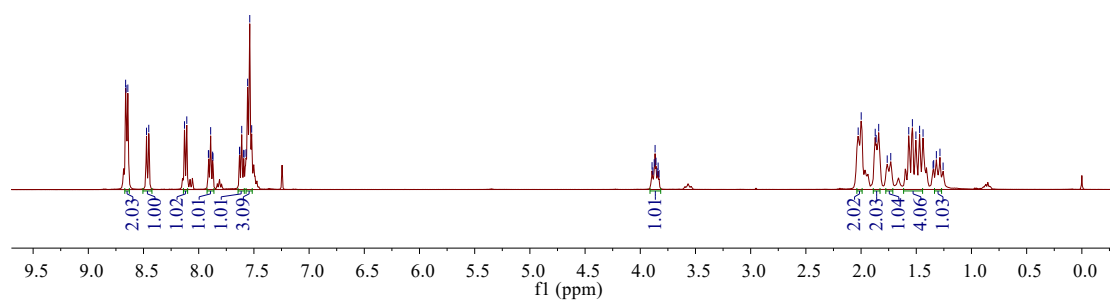

206.68, 161.17, 159.73, 152.64, 137.54, 134.17, 130.92, 129.12, 128.73, 128.57, 128.42, 126.24, 120.02, 47.00, 28.39, 26.03, 25.69

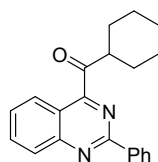

**3az** <sup>13</sup>C NMR (100 MHz, CDCl<sub>3</sub>)

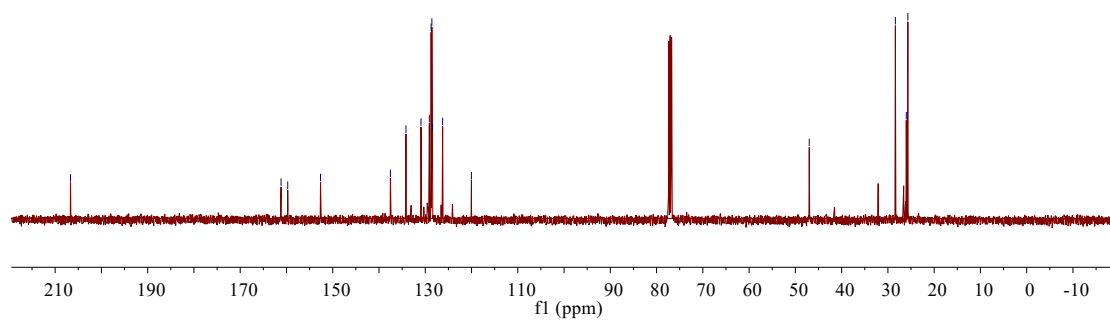

## Copy of Products 5 NMR

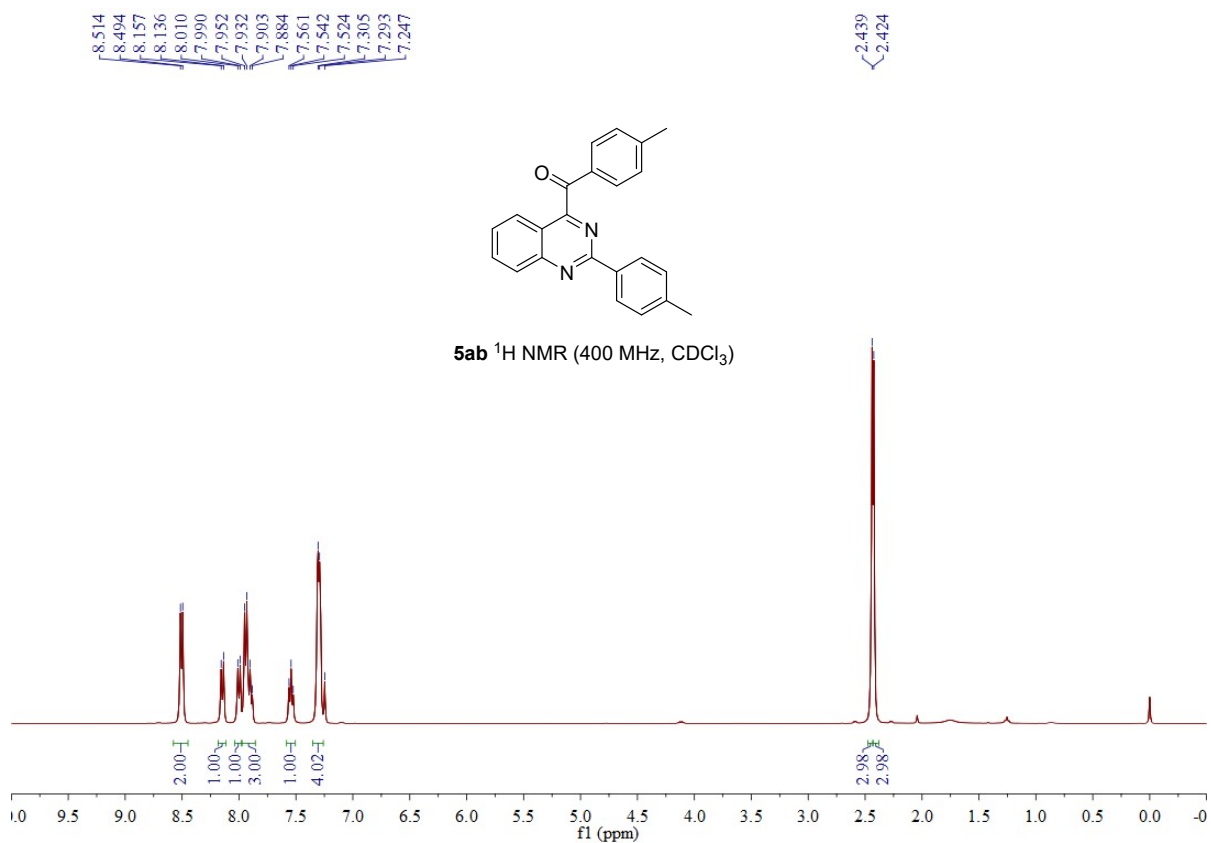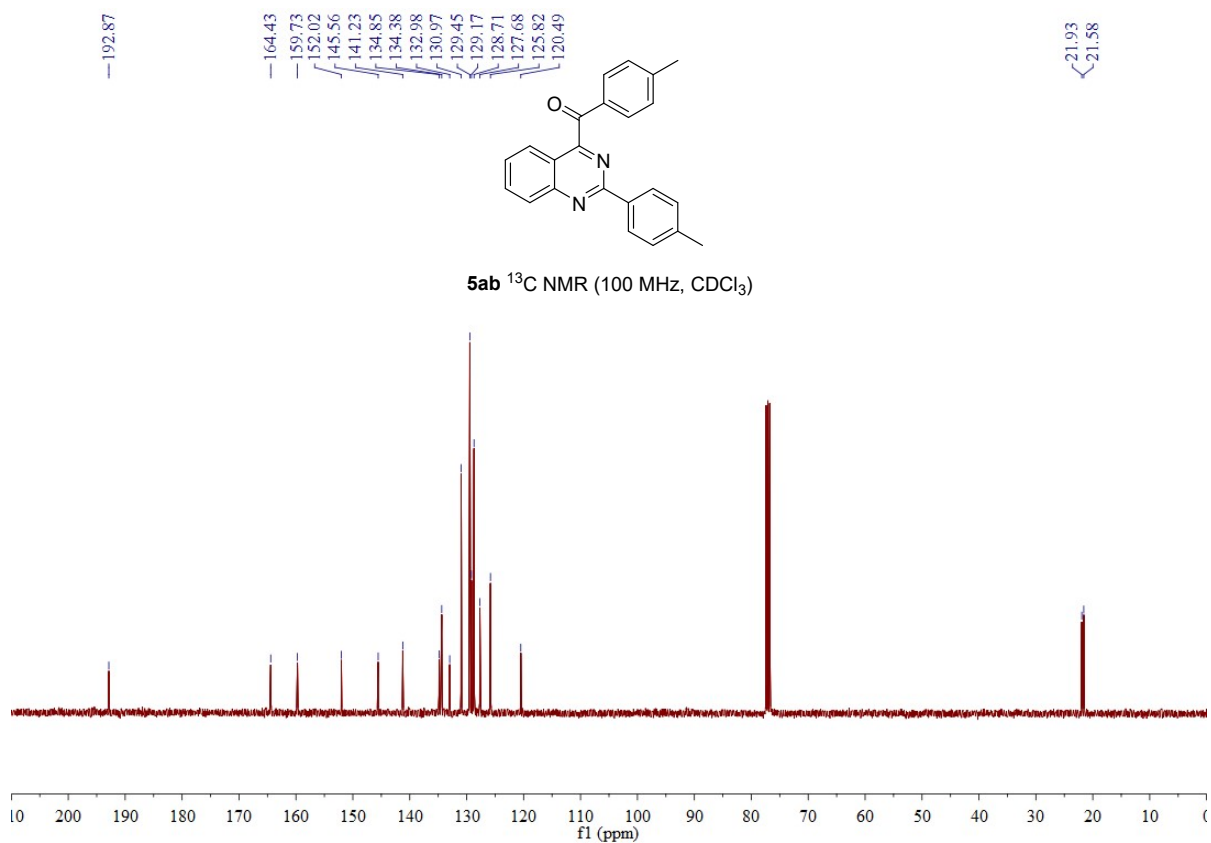

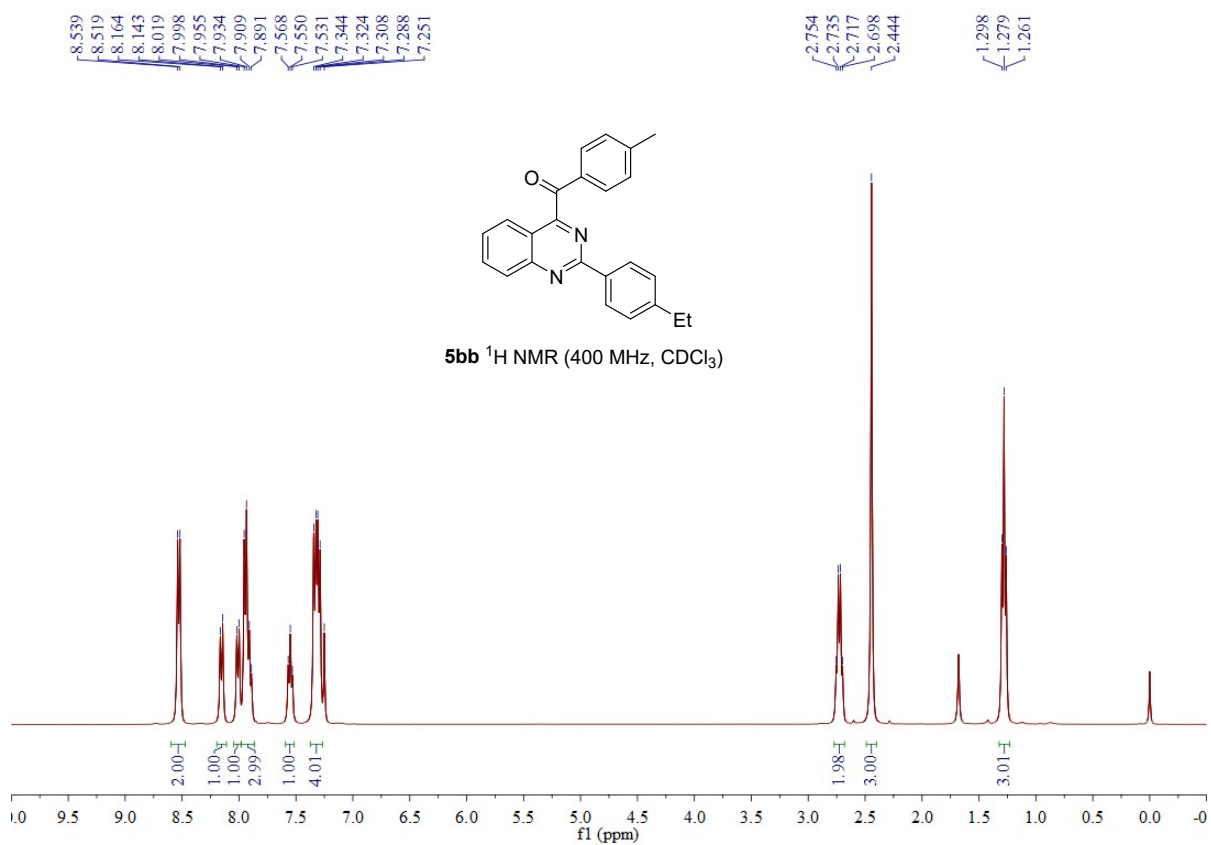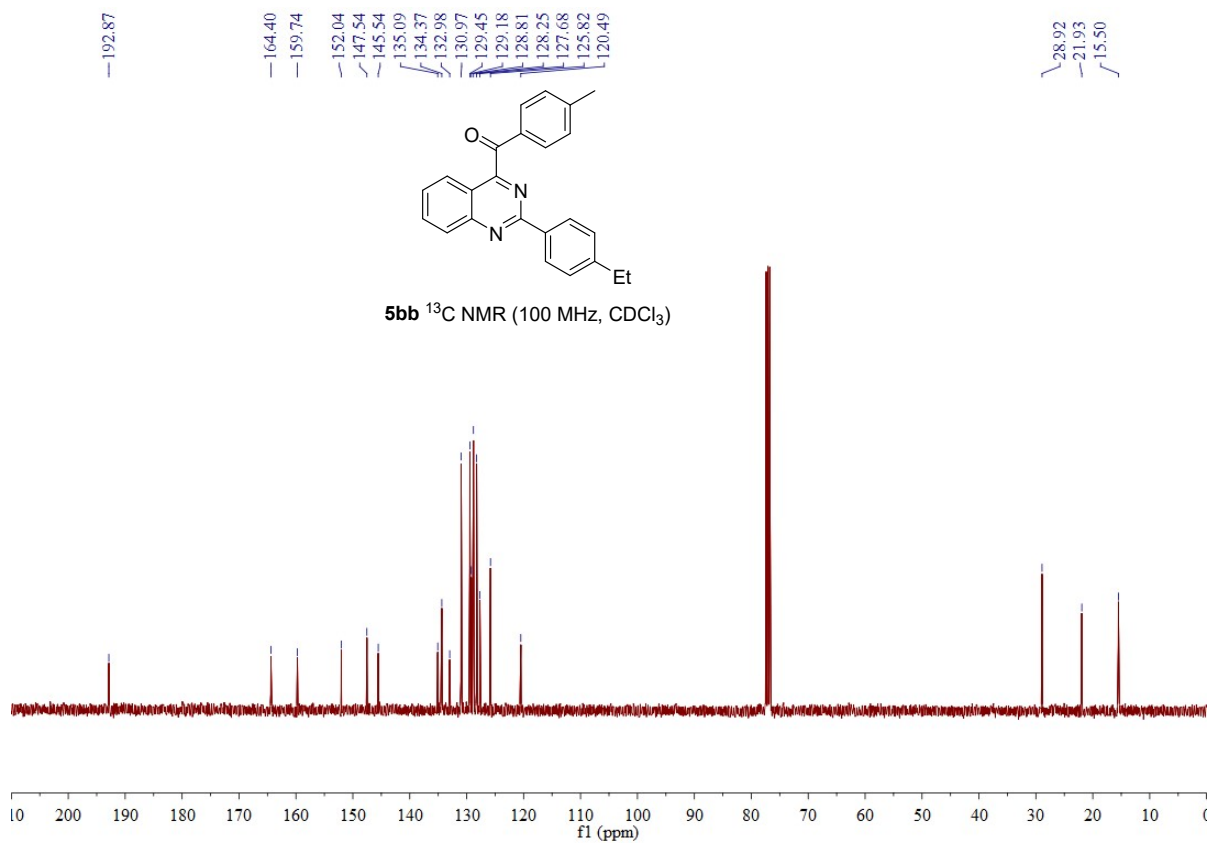



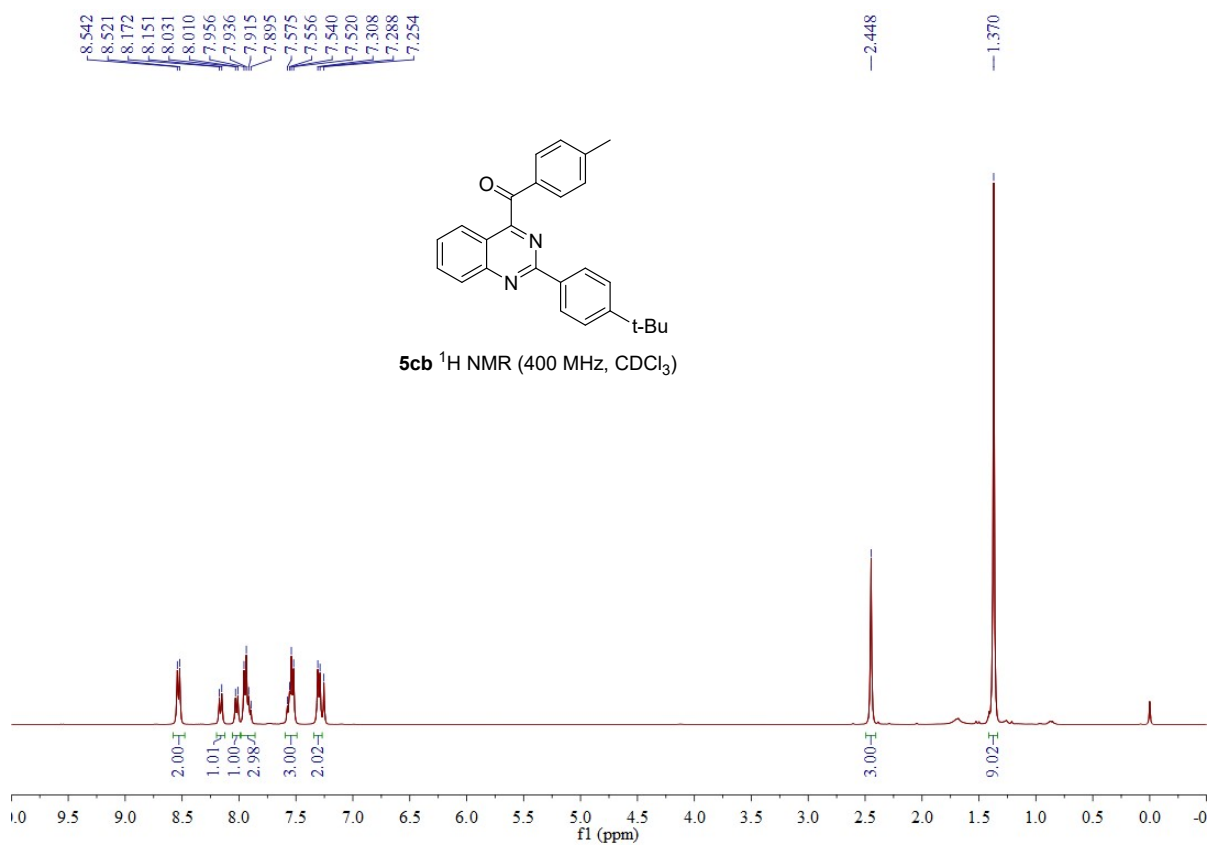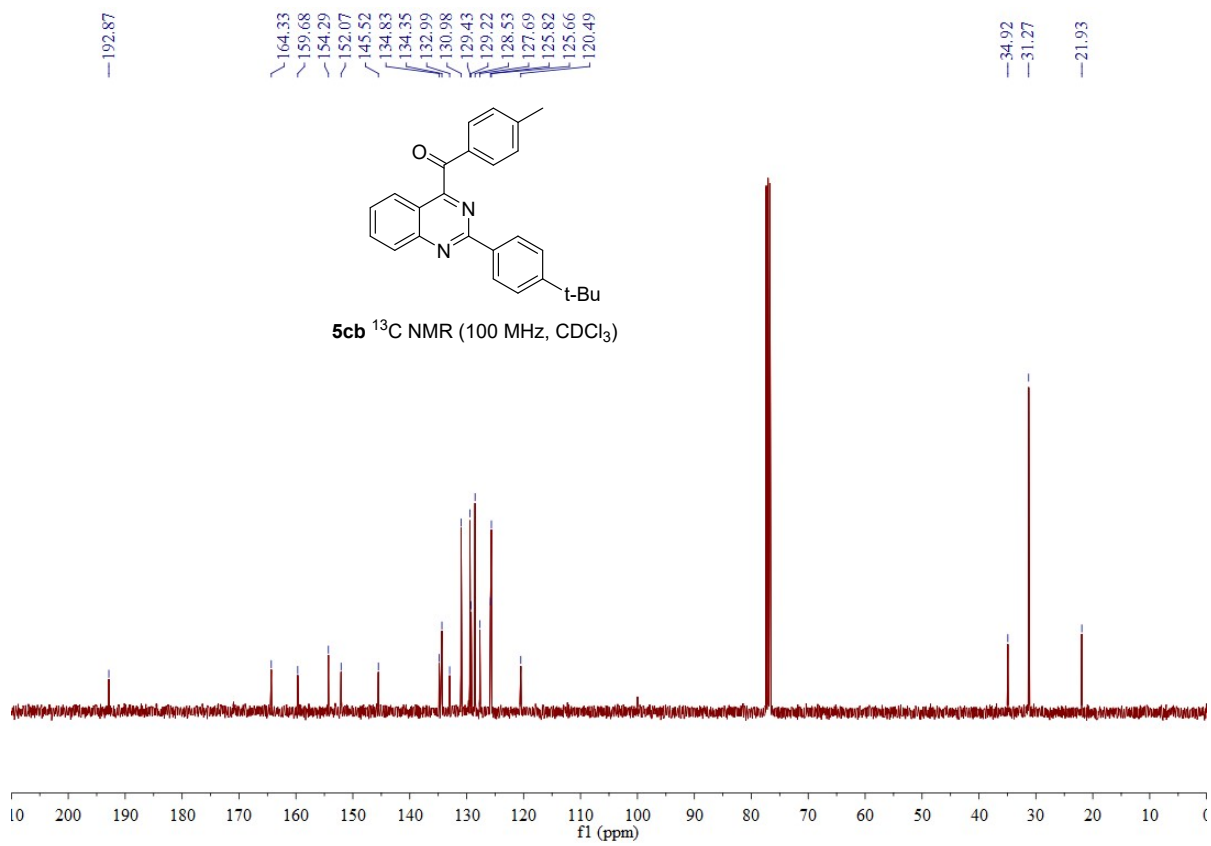

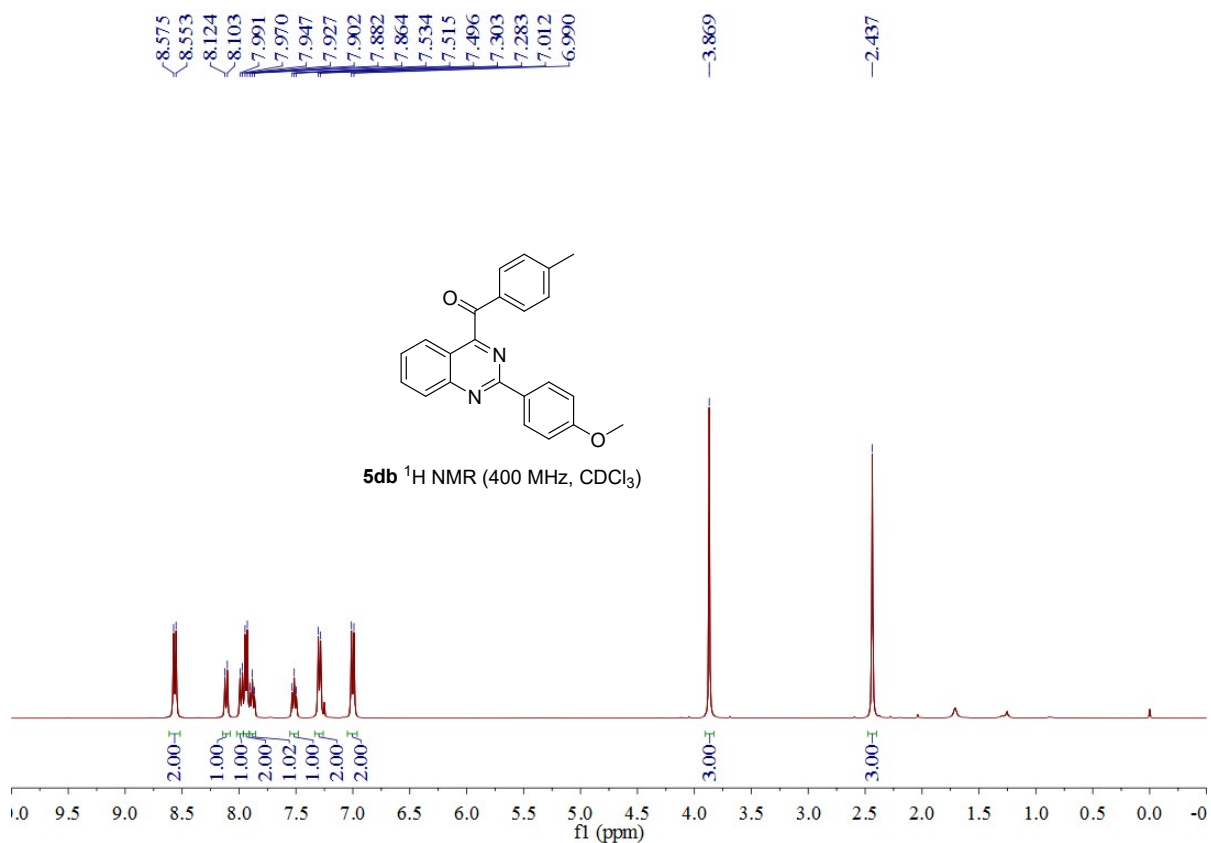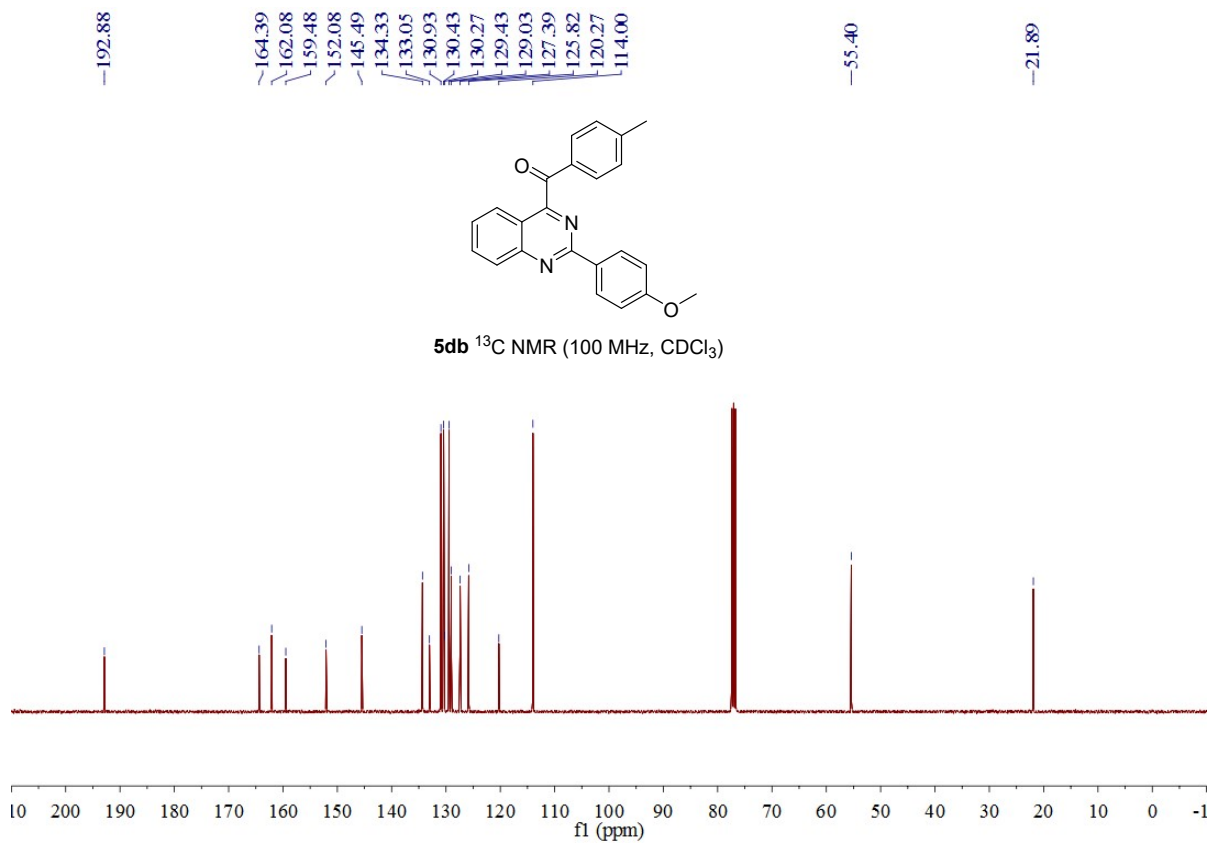

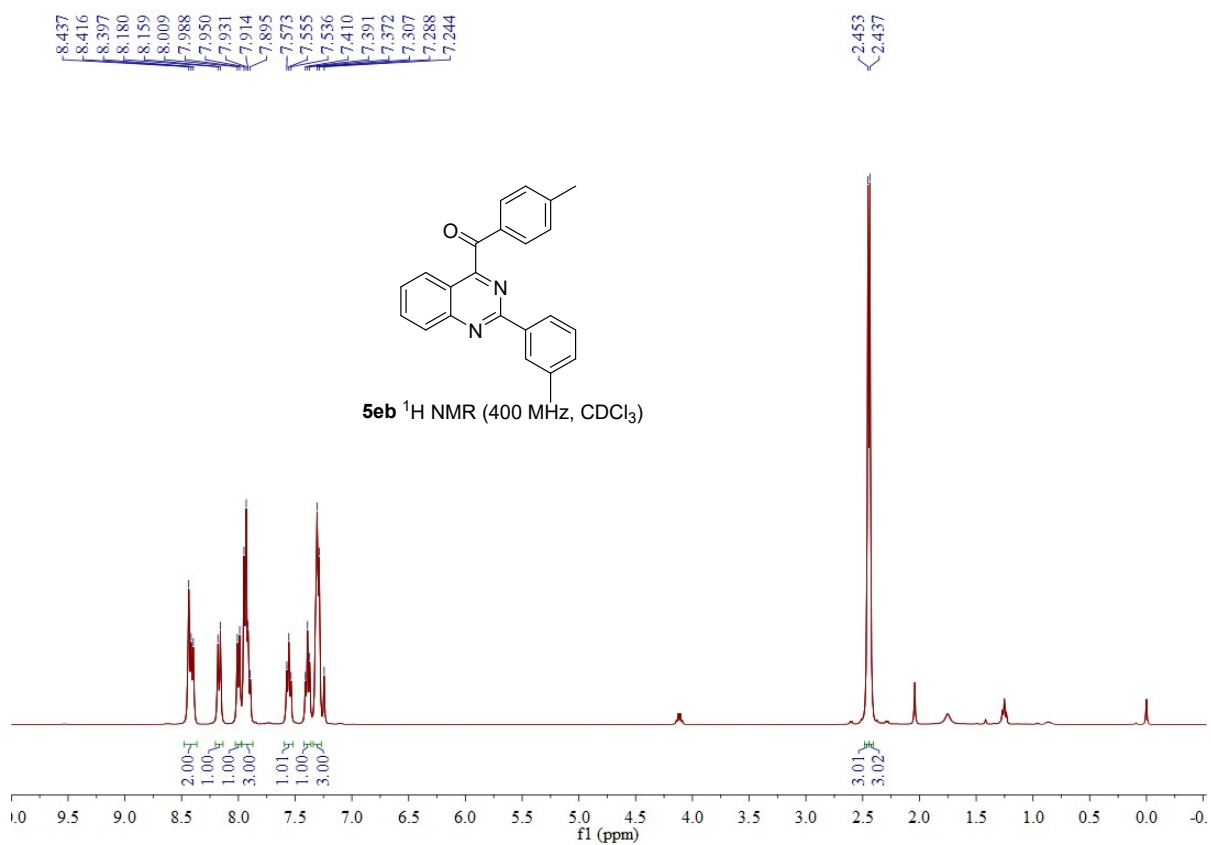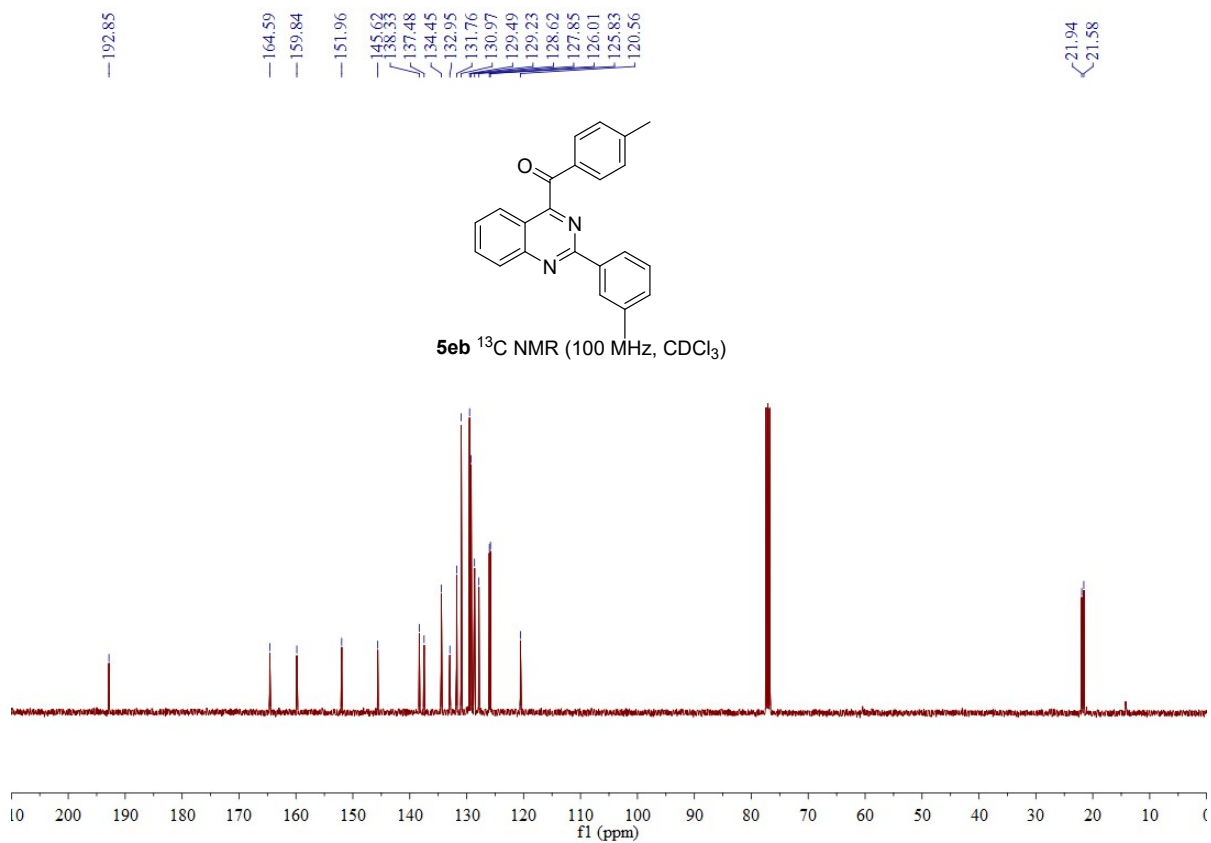

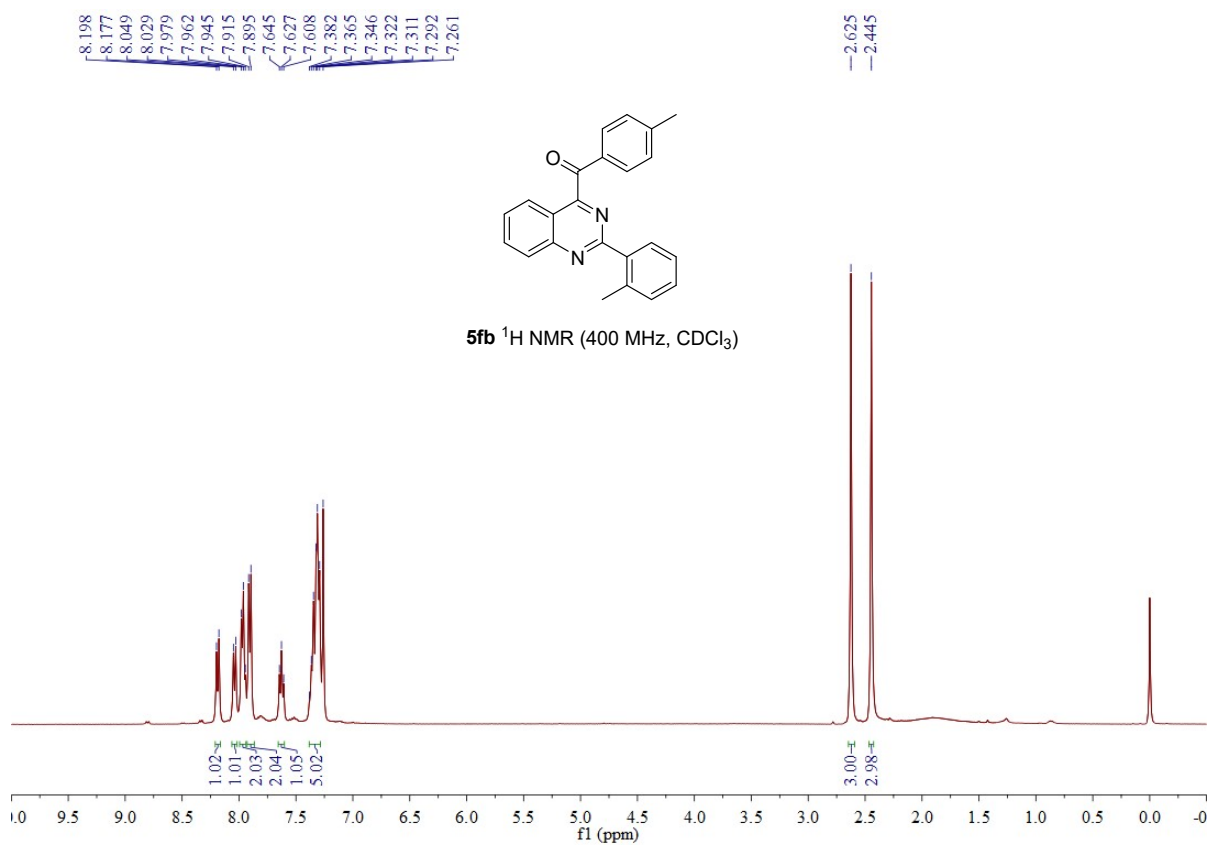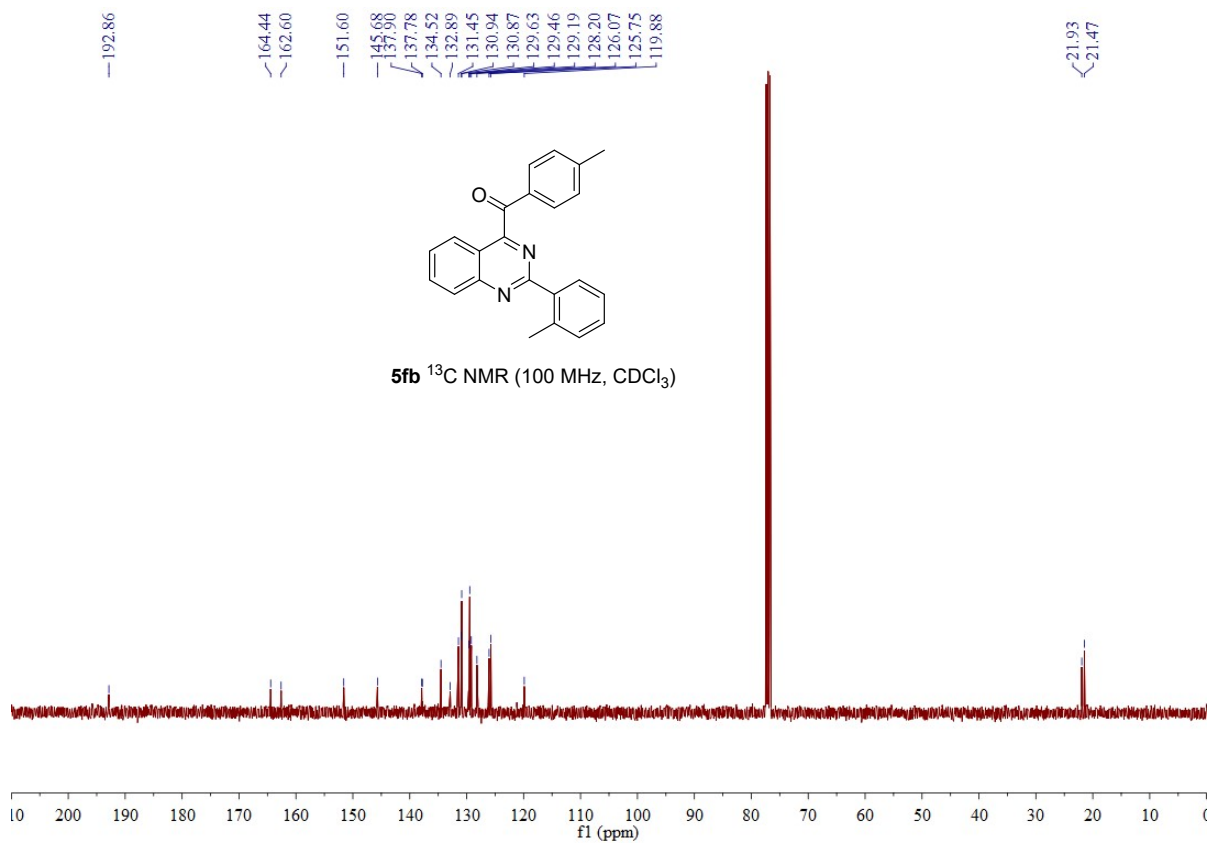

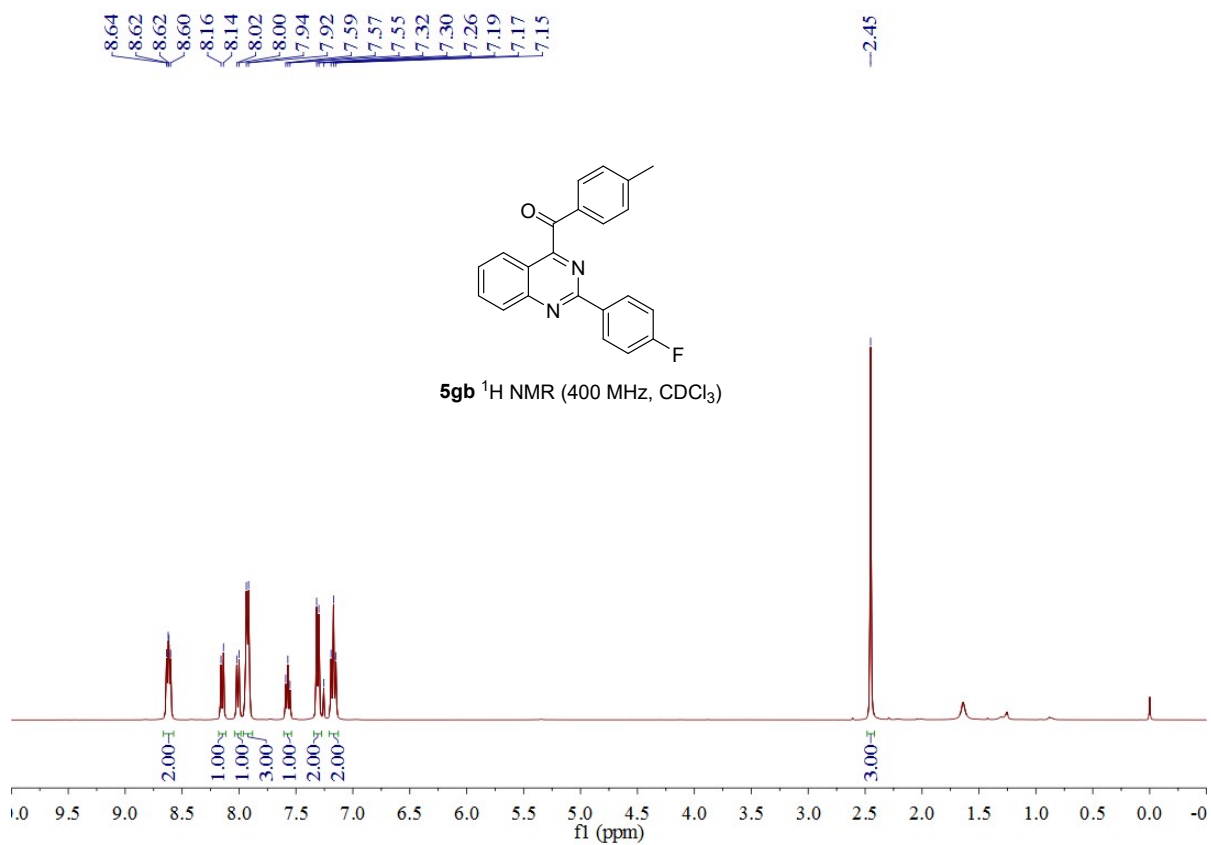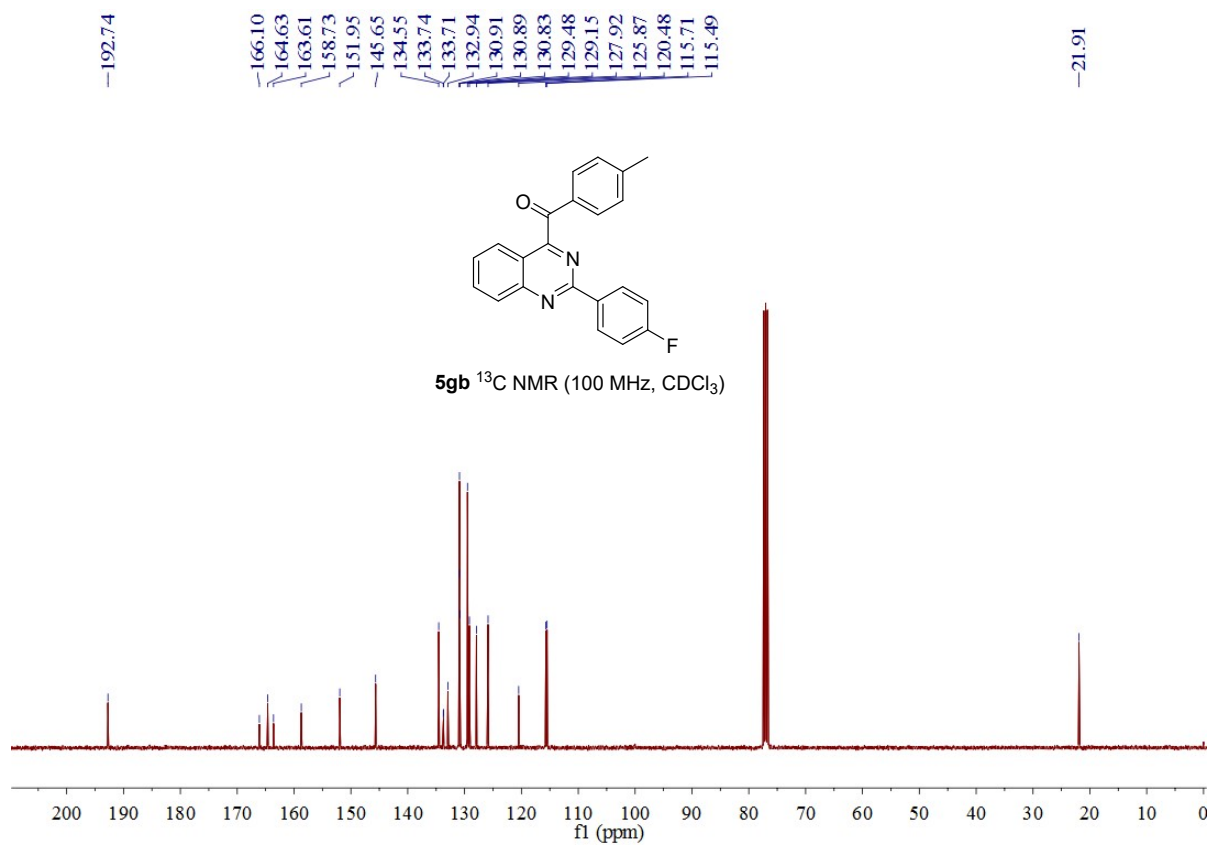

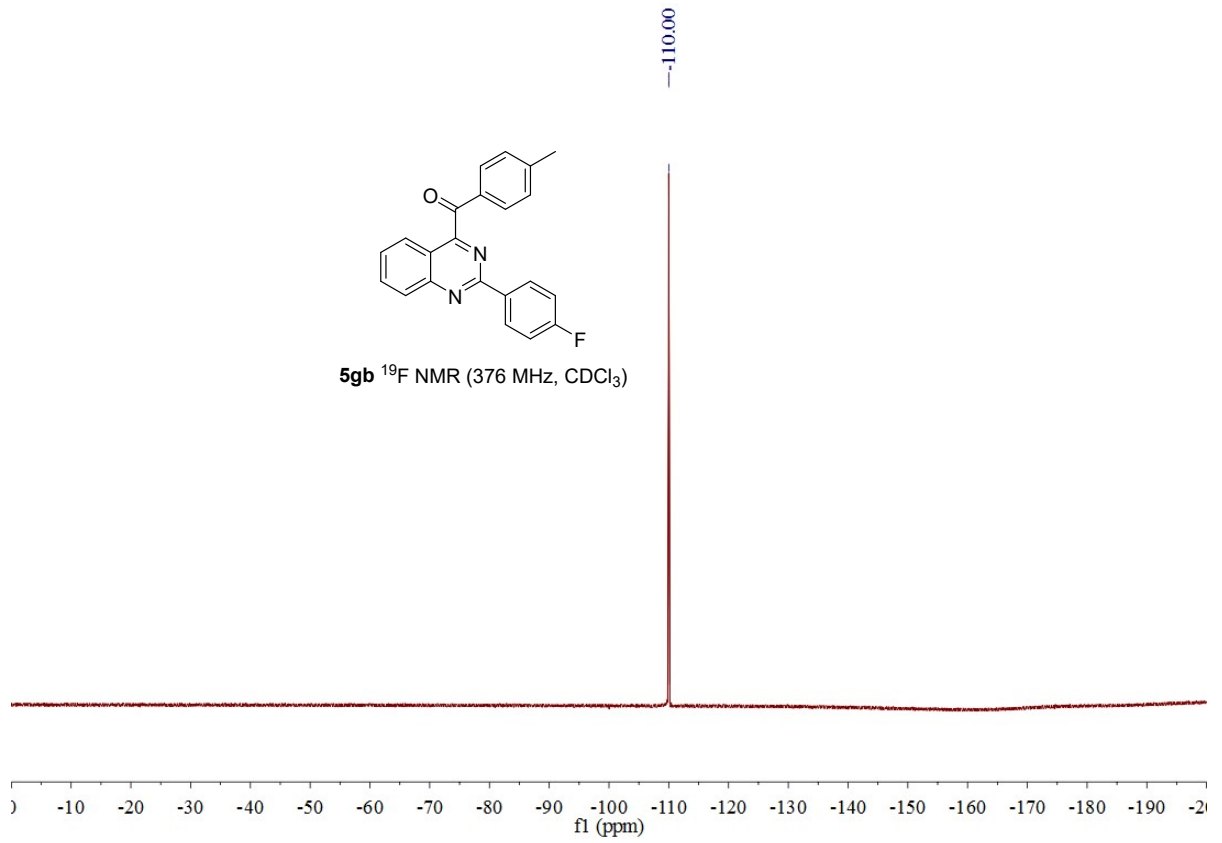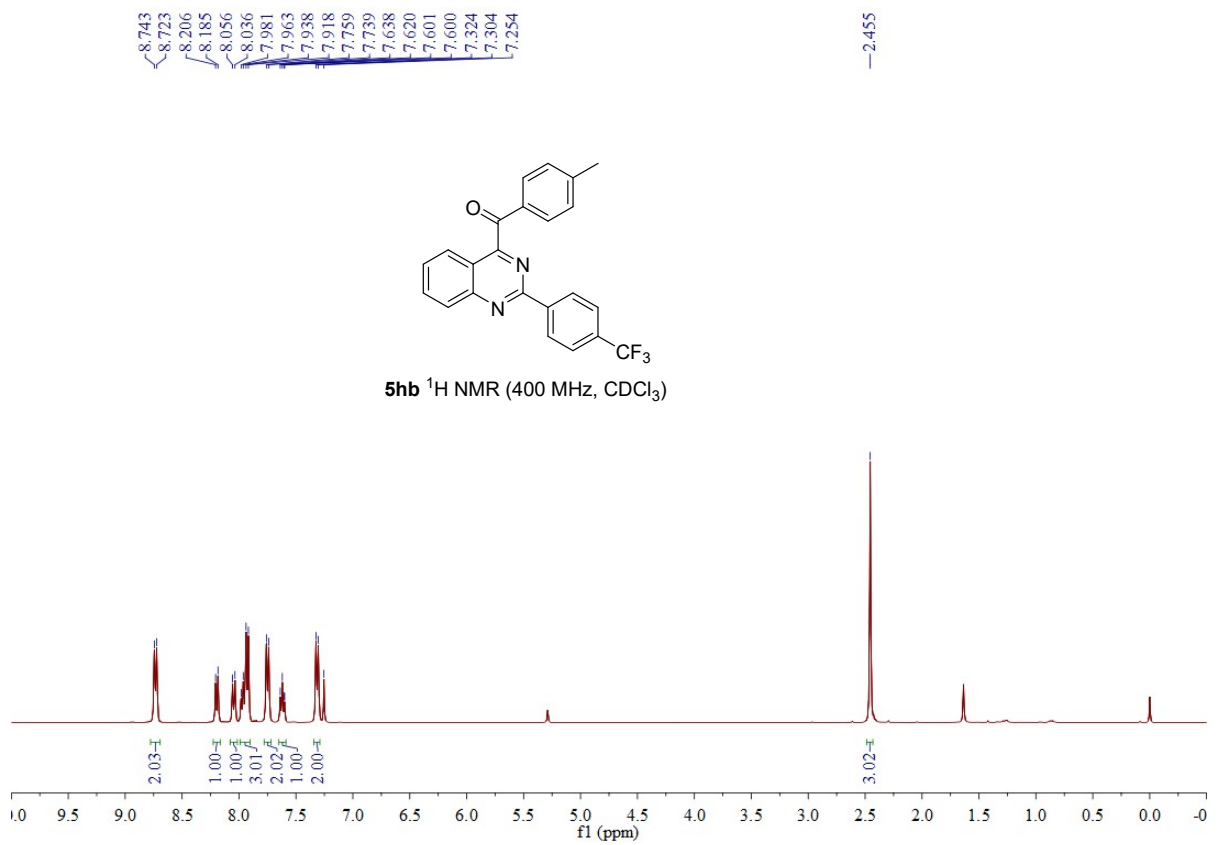

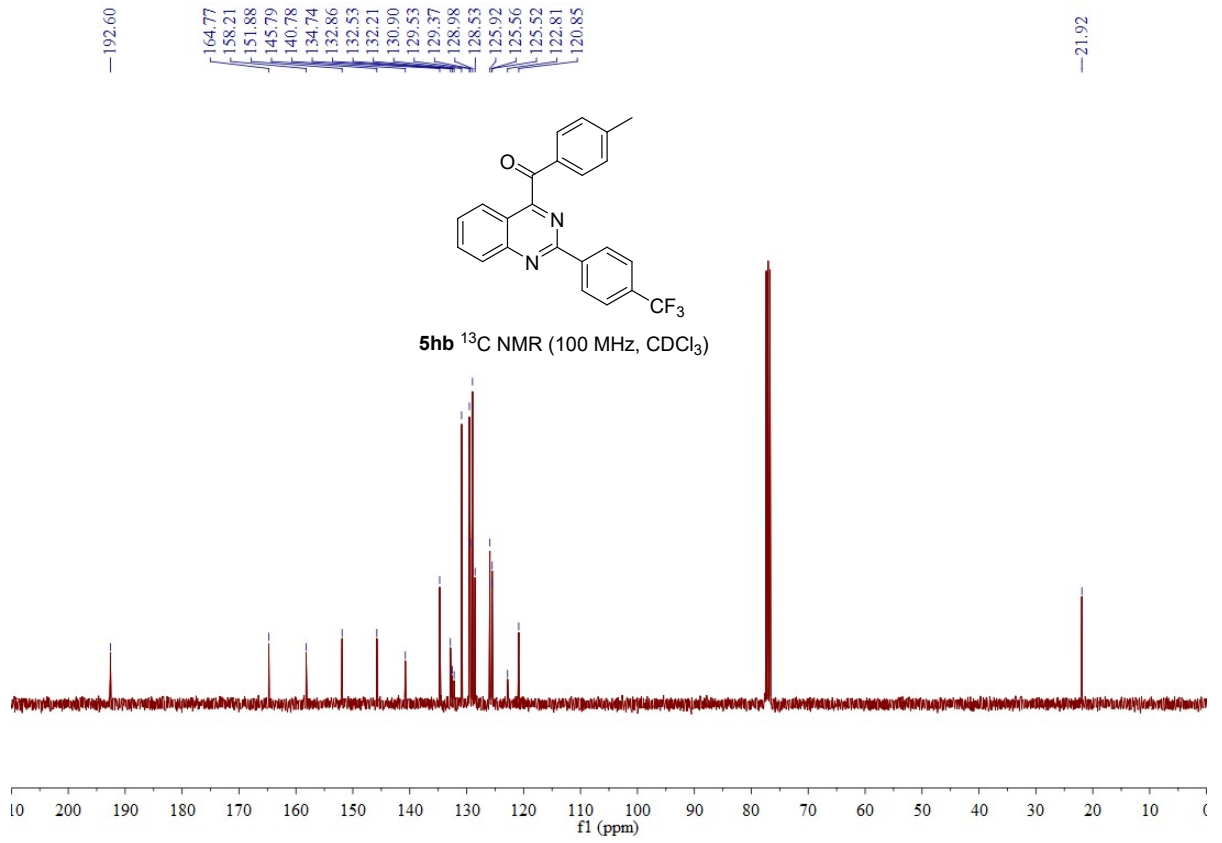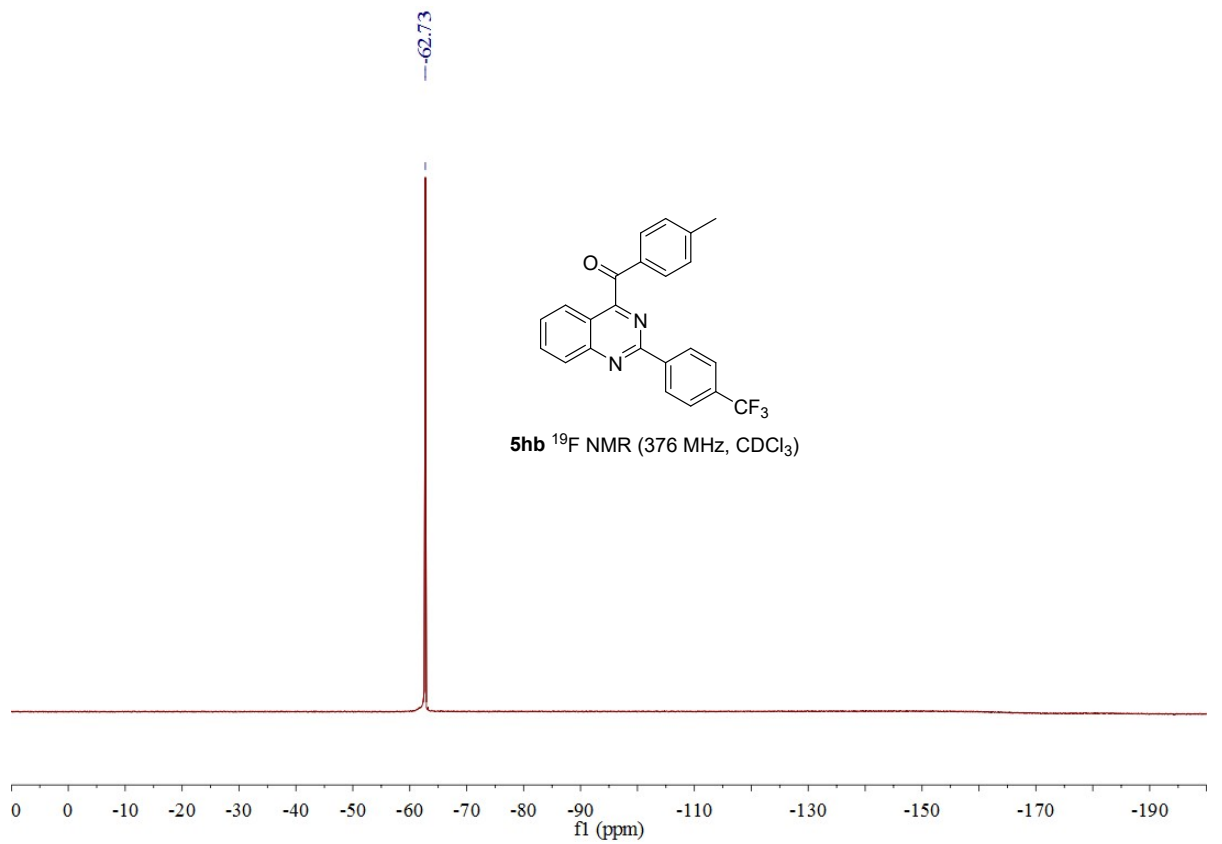

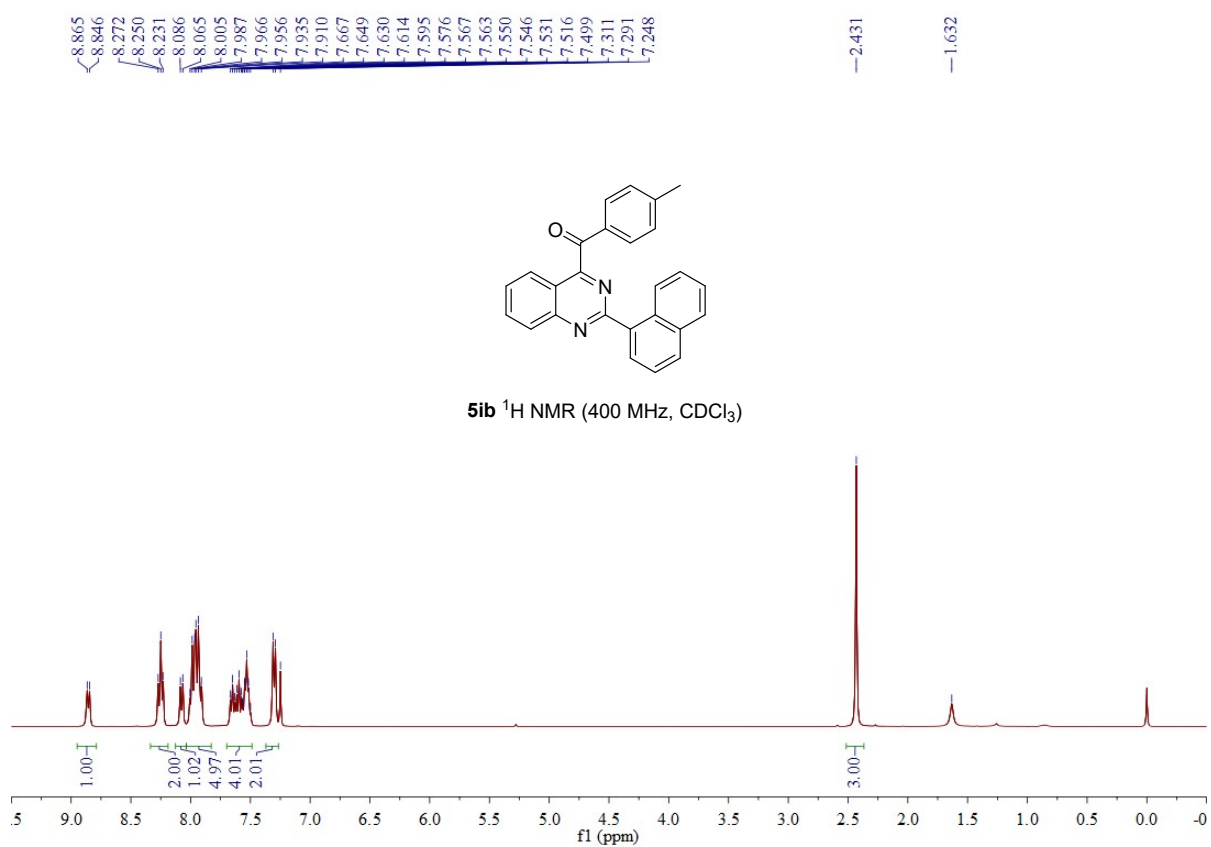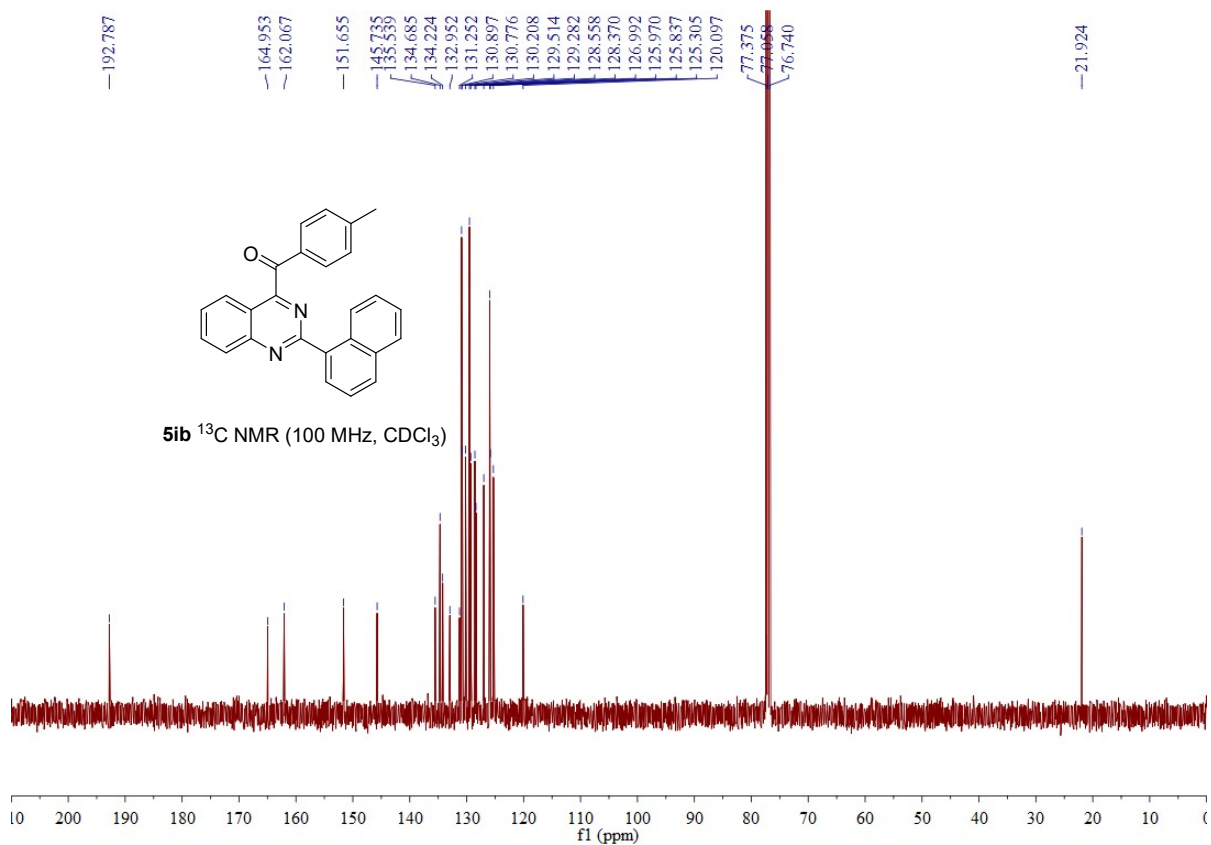



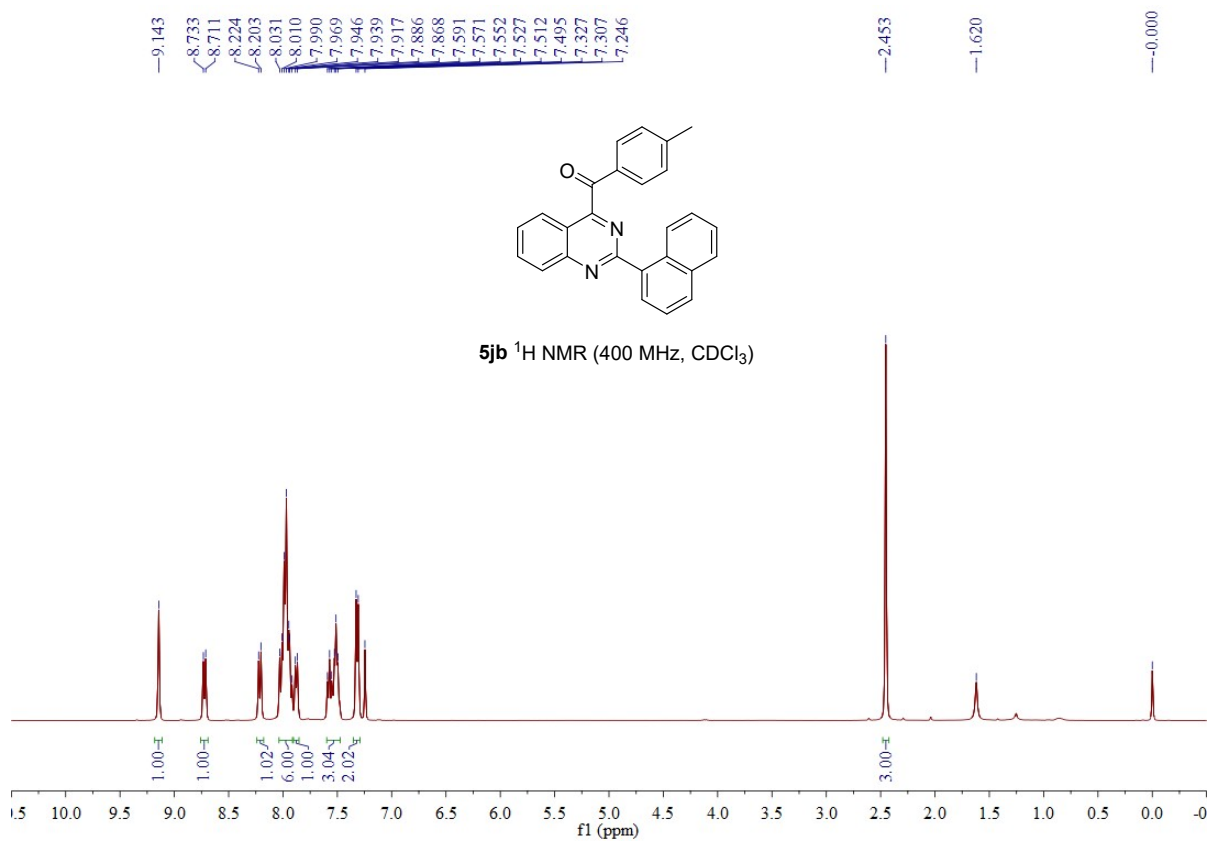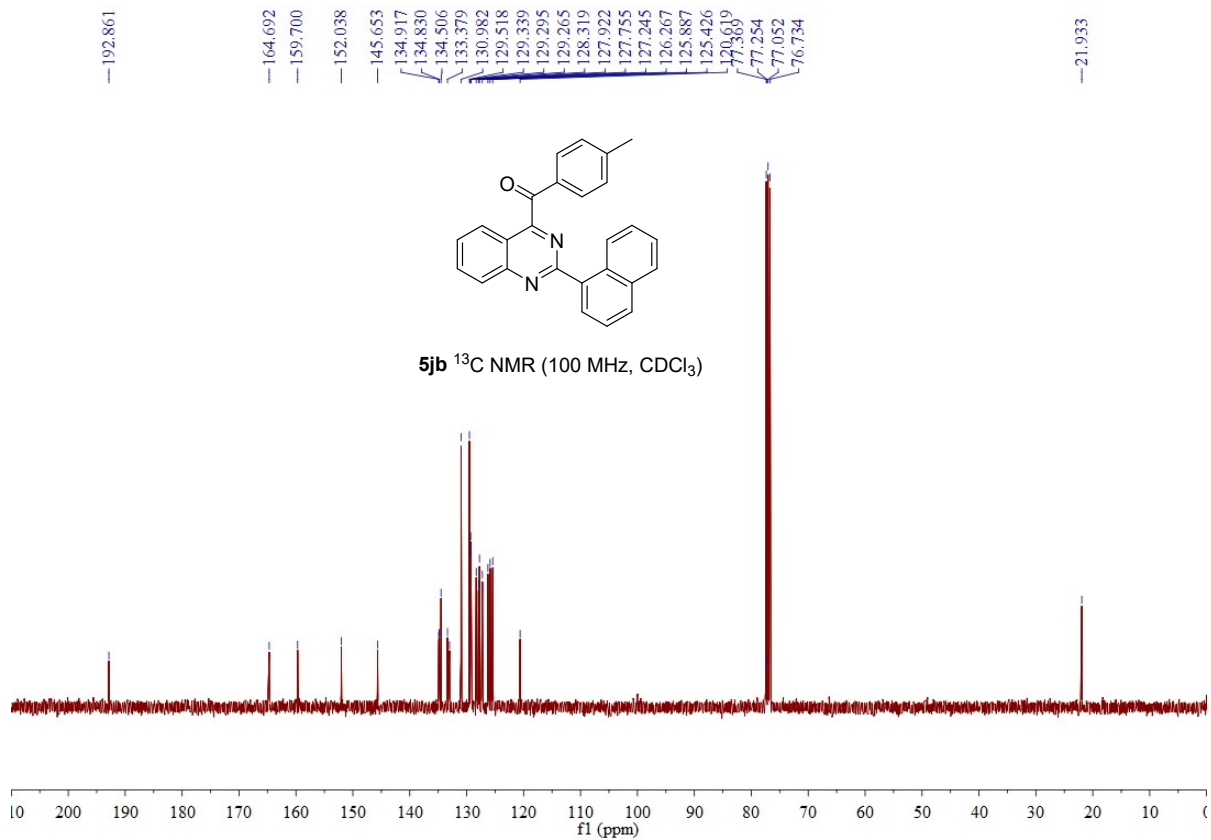

8.605  
8.597  
8.588  
8.583  
8.201  
8.179  
8.097  
8.077  
8.034  
8.013  
7.968  
7.949  
7.931  
7.626  
7.607  
7.588  
7.520  
7.511  
7.503  
7.481  
7.254

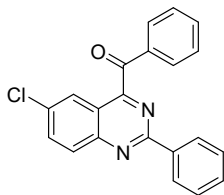

5la <sup>1</sup>H NMR (400 MHz, CDCl<sub>3</sub>)

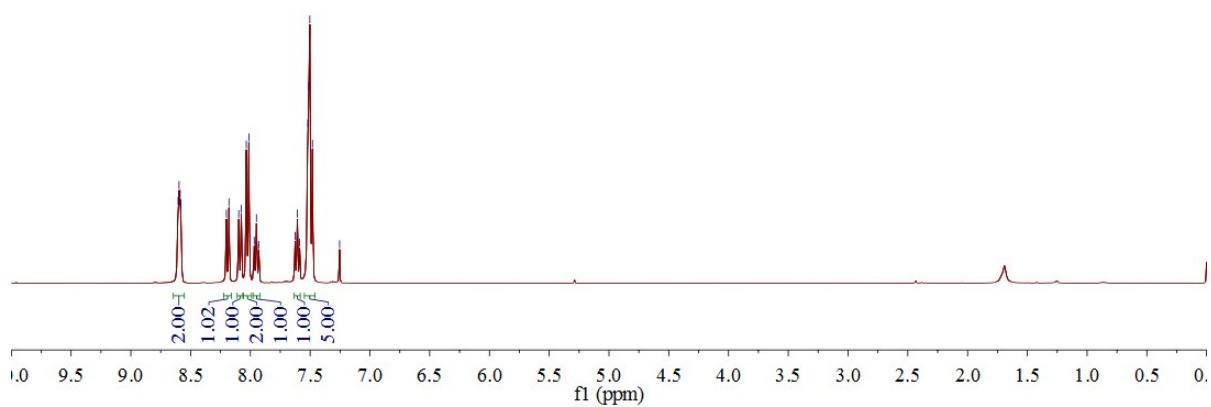

191.84  
163.21  
159.52  
152.24  
140.98  
137.32  
134.64  
133.81  
132.23  
131.06  
129.36  
129.08  
128.74  
128.68  
128.20  
125.70  
120.54

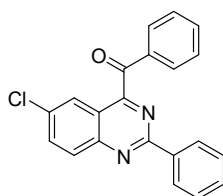

5la <sup>13</sup>C NMR (100 MHz, CDCl<sub>3</sub>)

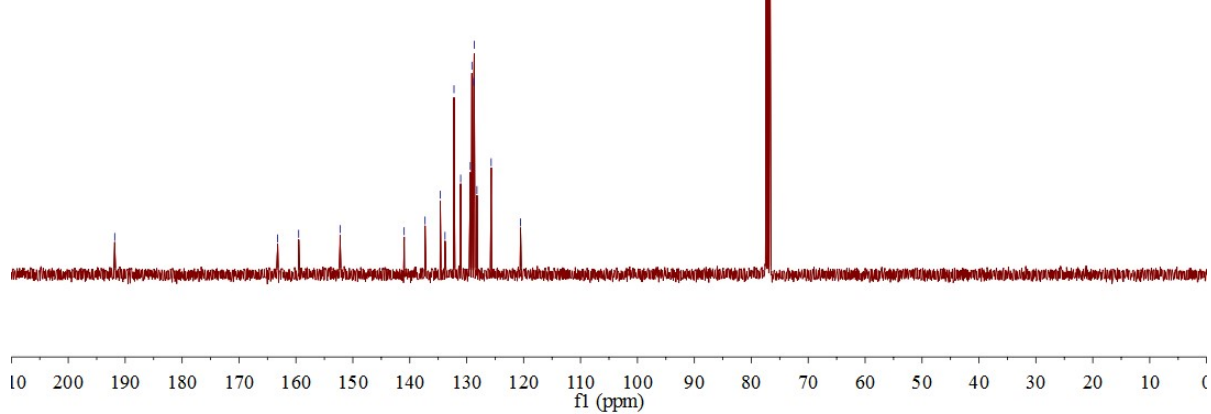

8.598  
8.594  
8.585  
8.575  
8.266  
8.262  
8.078  
8.060  
8.045  
8.014  
8.010  
7.992  
7.987  
7.711  
7.693  
7.674  
7.555  
7.536  
7.521  
7.517  
7.509  
7.259

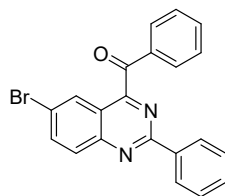

**5ma**  $^1\text{H}$  NMR (400 MHz,  $\text{CDCl}_3$ )

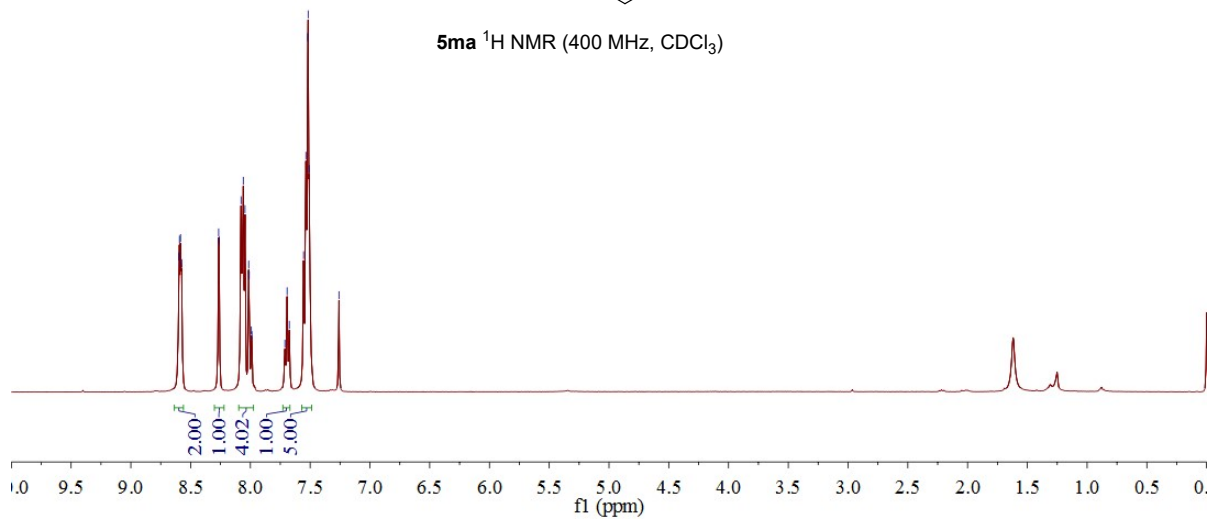

192.53  
162.75  
159.76  
150.87  
138.11  
137.05  
135.14  
134.53  
131.25  
130.97  
130.93  
128.77  
128.06  
122.00  
121.50

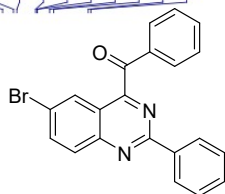

**5ma**  $^{13}\text{C}$  NMR (100 MHz,  $\text{CDCl}_3$ )

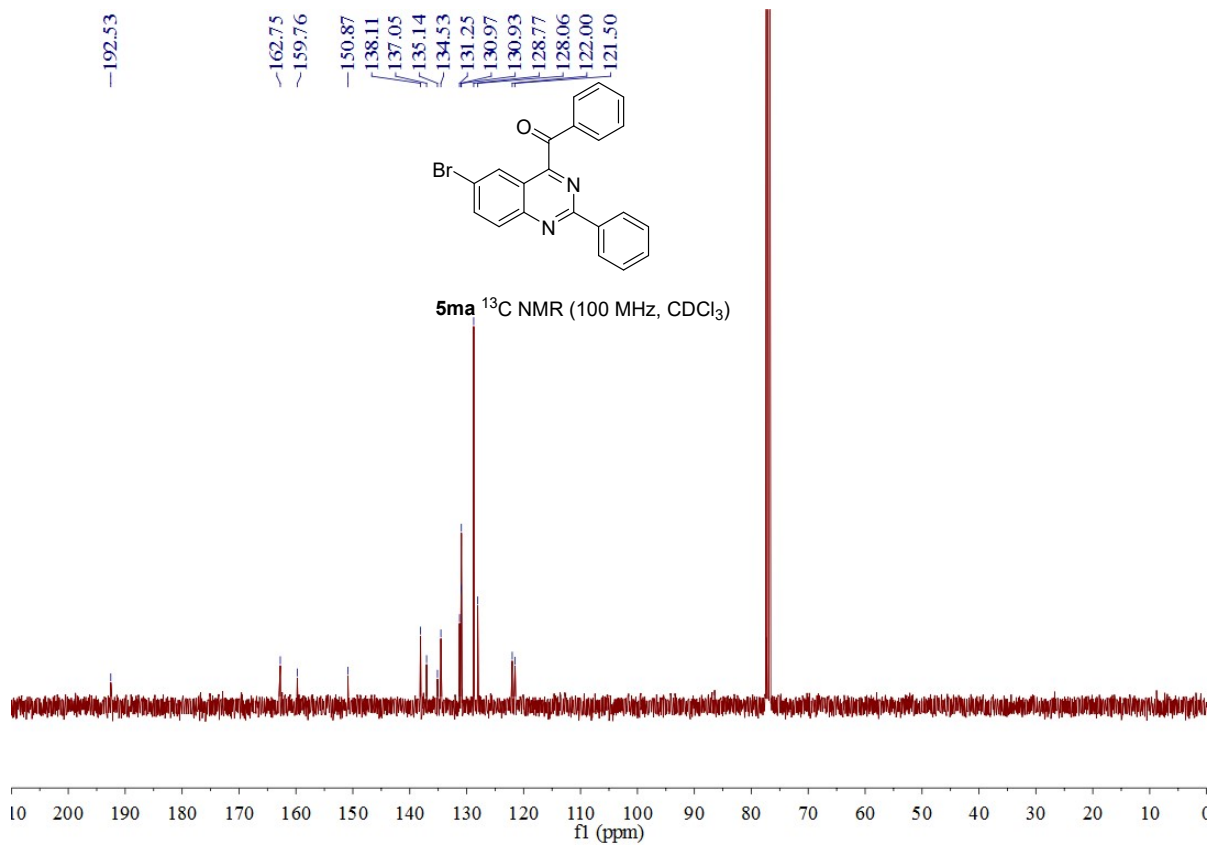

8.596  
8.589  
8.586  
8.580  
8.572  
8.223  
8.210  
8.200  
8.187  
8.085  
8.067  
7.777  
7.771  
7.756  
7.749  
7.742  
7.728  
7.721  
7.705  
7.699  
7.686  
7.667  
7.551  
7.531  
7.519  
7.511  
7.503  
7.260

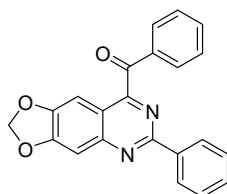

5na <sup>1</sup>H NMR (400 MHz, CDCl<sub>3</sub>)

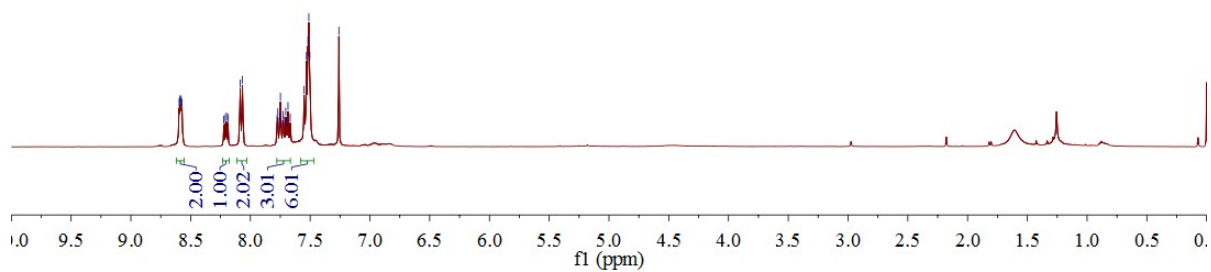

192.68  
149.52  
137.17  
134.40  
132.02  
131.93  
131.02  
130.91  
128.72  
109.32  
109.12

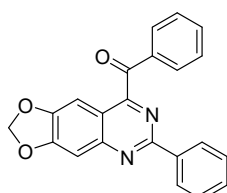

5na <sup>13</sup>C NMR (100 MHz, CDCl<sub>3</sub>)

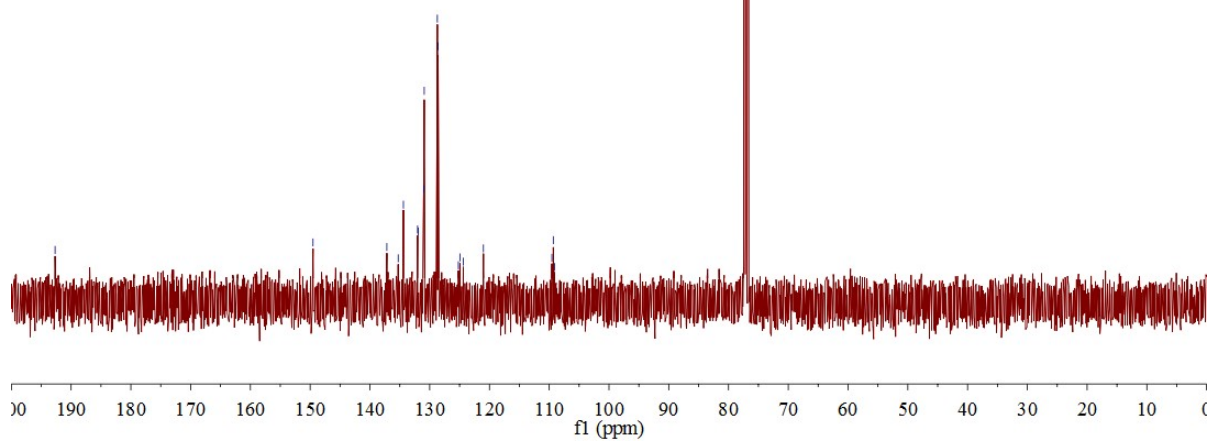

## Copy of Products 7 NMR

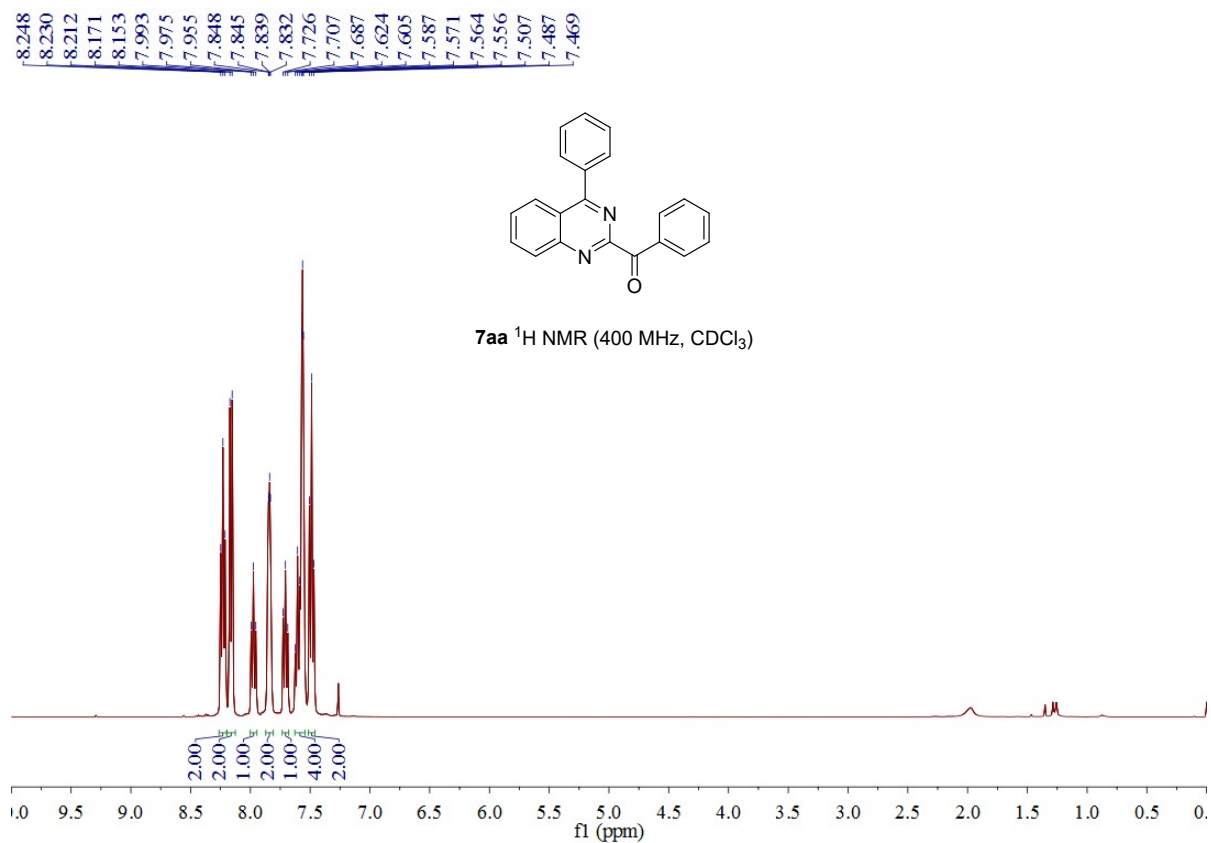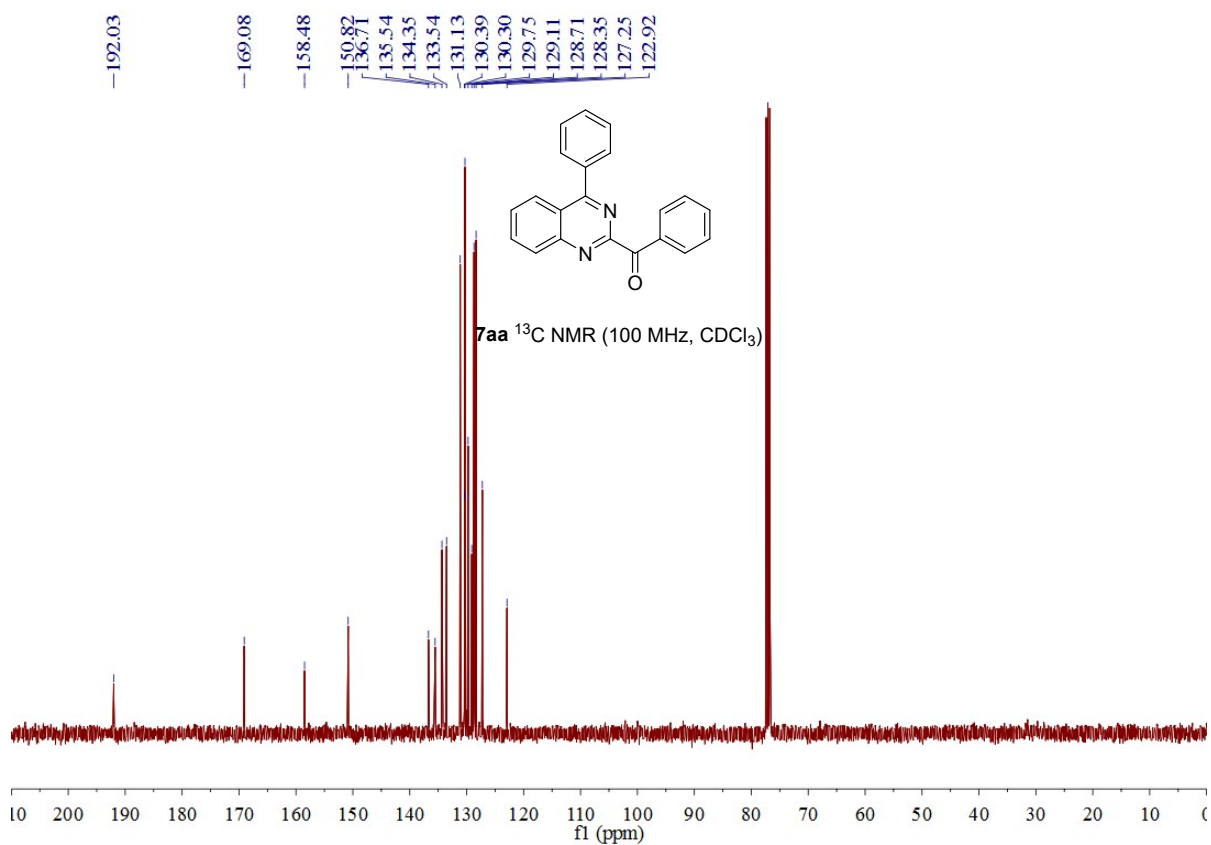

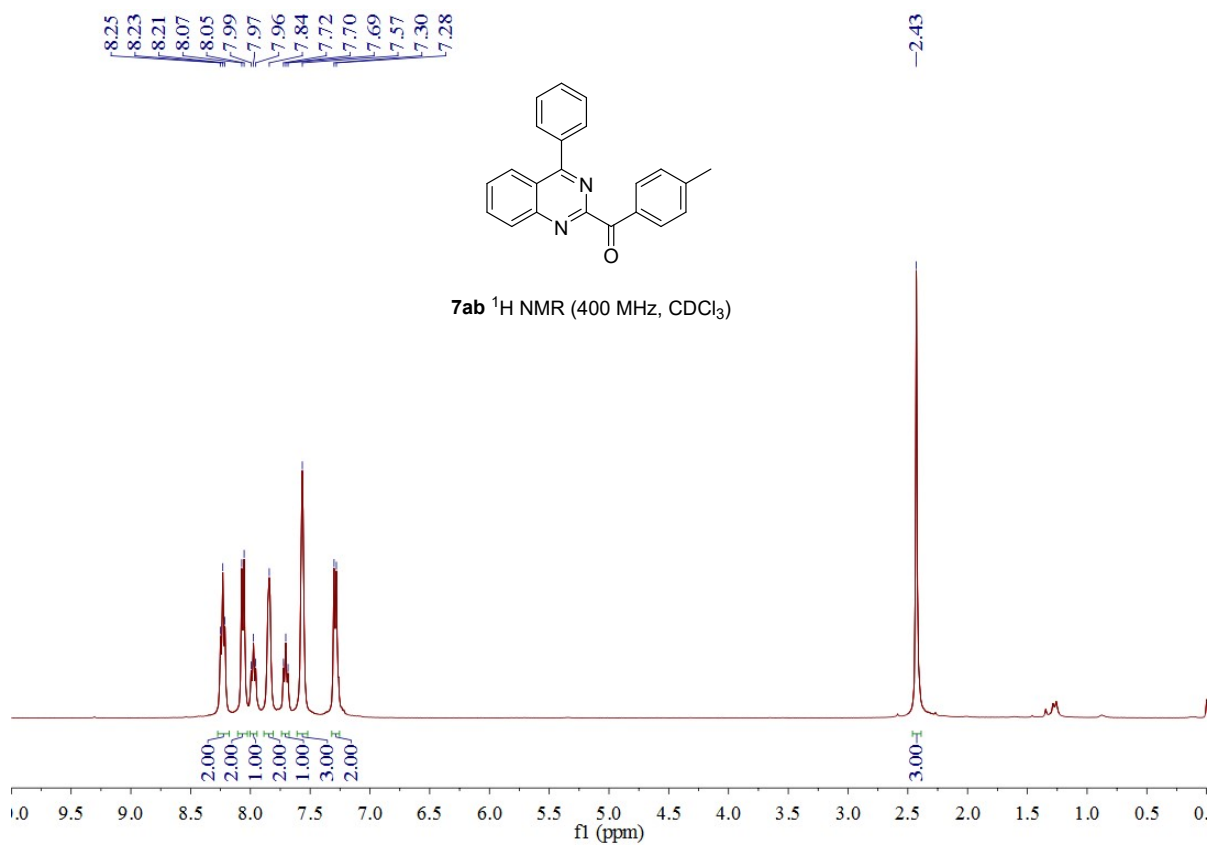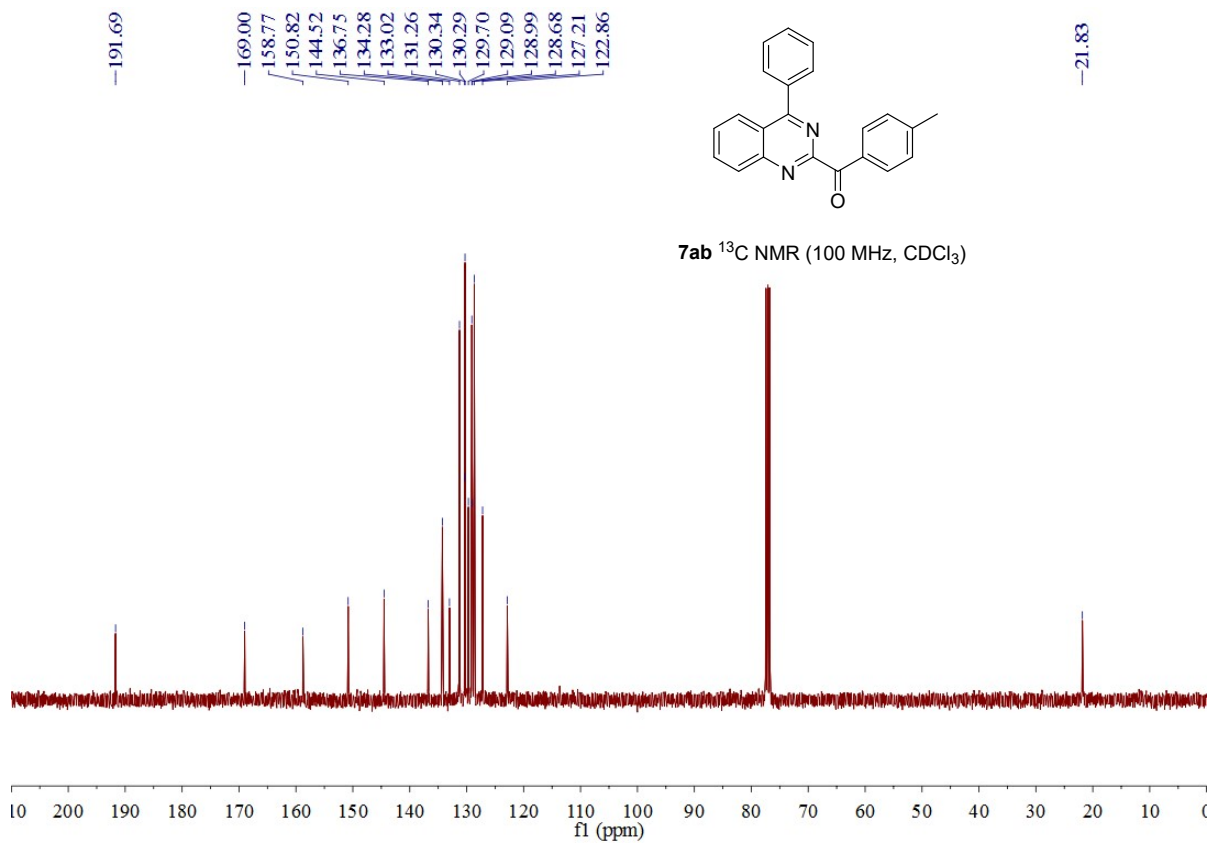

8.25  
8.23  
8.22  
8.10  
8.08  
7.98  
7.85  
7.85  
7.84  
7.71  
7.57  
7.57  
7.33  
7.31

2.75  
2.74  
2.72  
2.70

1.29  
1.27  
1.25

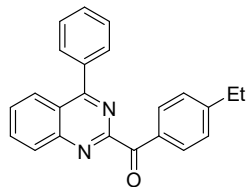

**7ac**  $^1\text{H}$  NMR (400 MHz,  $\text{CDCl}_3$ )

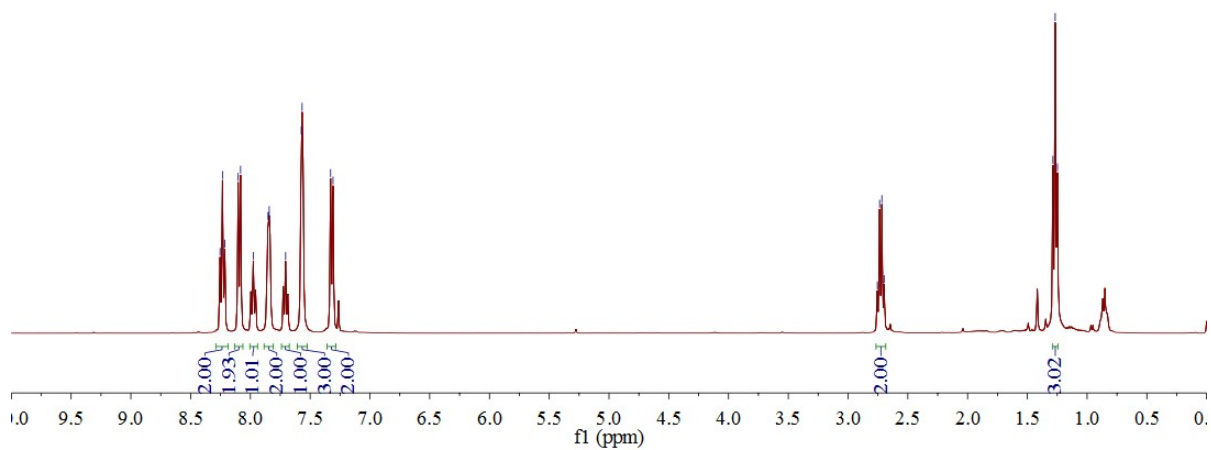

-191.69

-169.02

-158.78

-150.82

-150.67

-136.75

-134.29

-133.19

-131.38

-130.34

-130.29

-129.70

-128.99

-128.68

-127.93

-127.22

-122.87

-29.11

-15.15

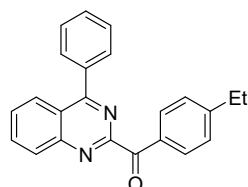

**7ac**  $^{13}\text{C}$  NMR (100 MHz,  $\text{CDCl}_3$ )

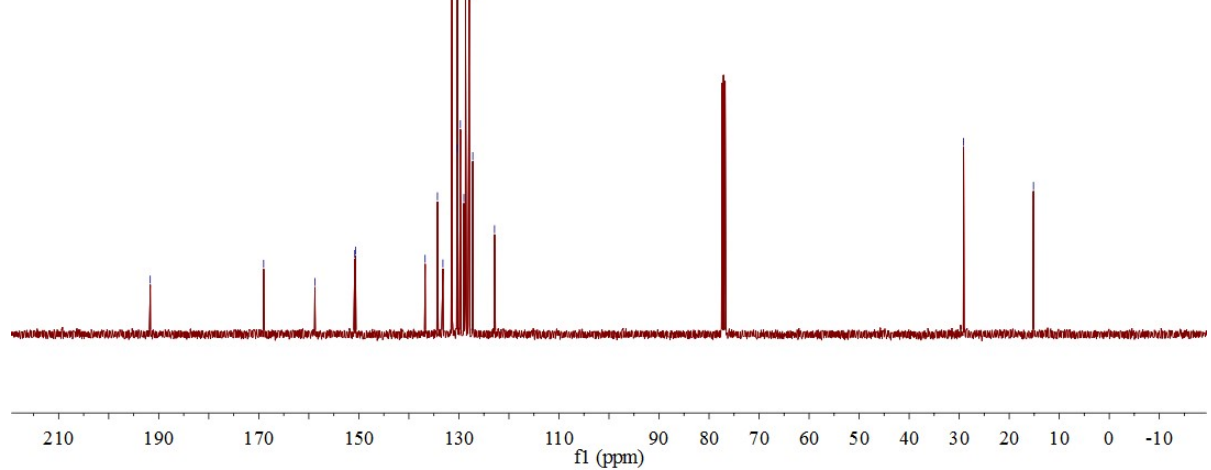

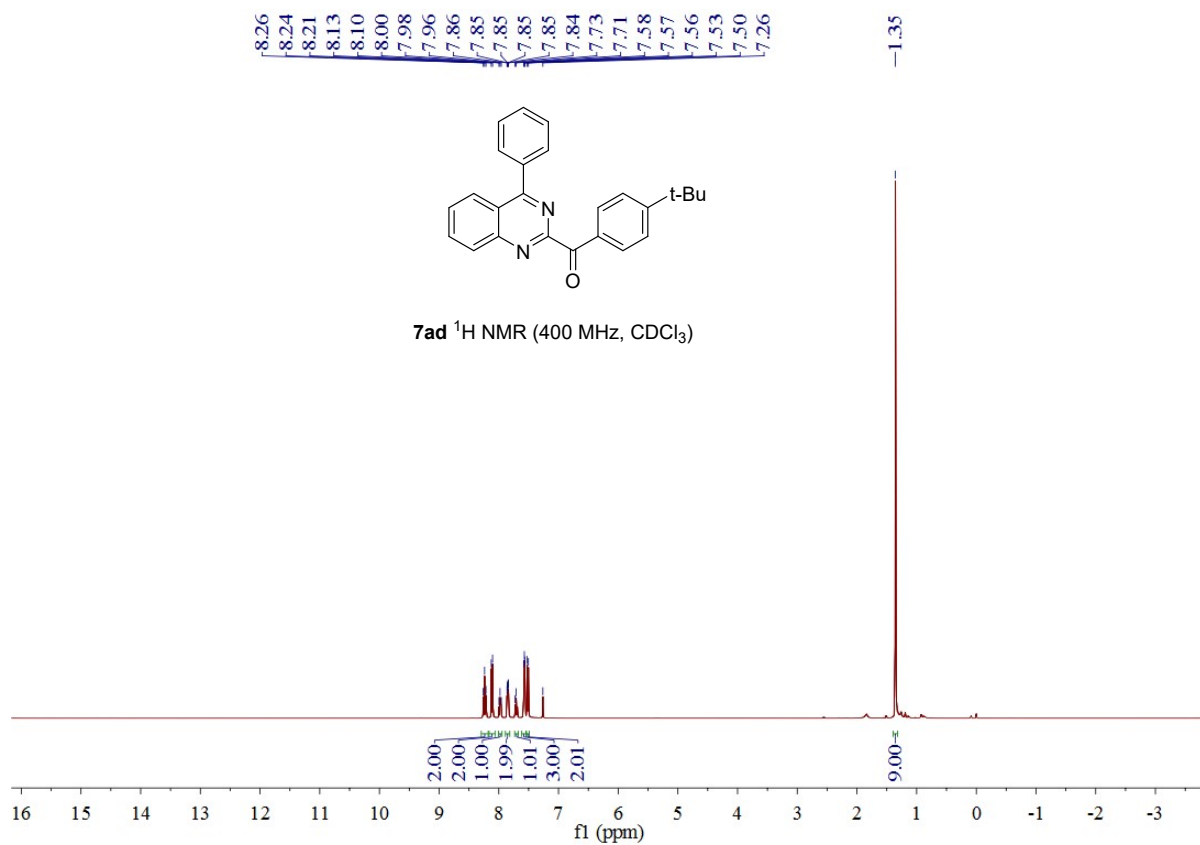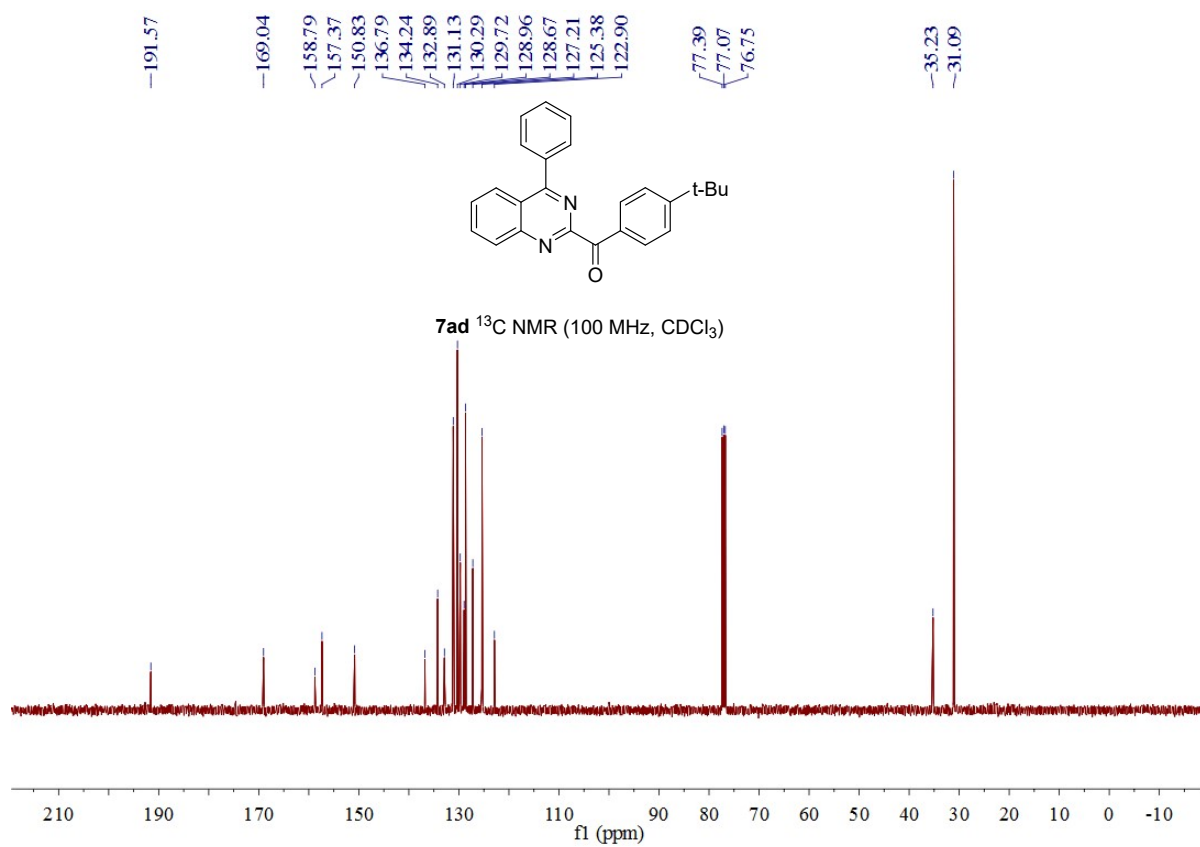



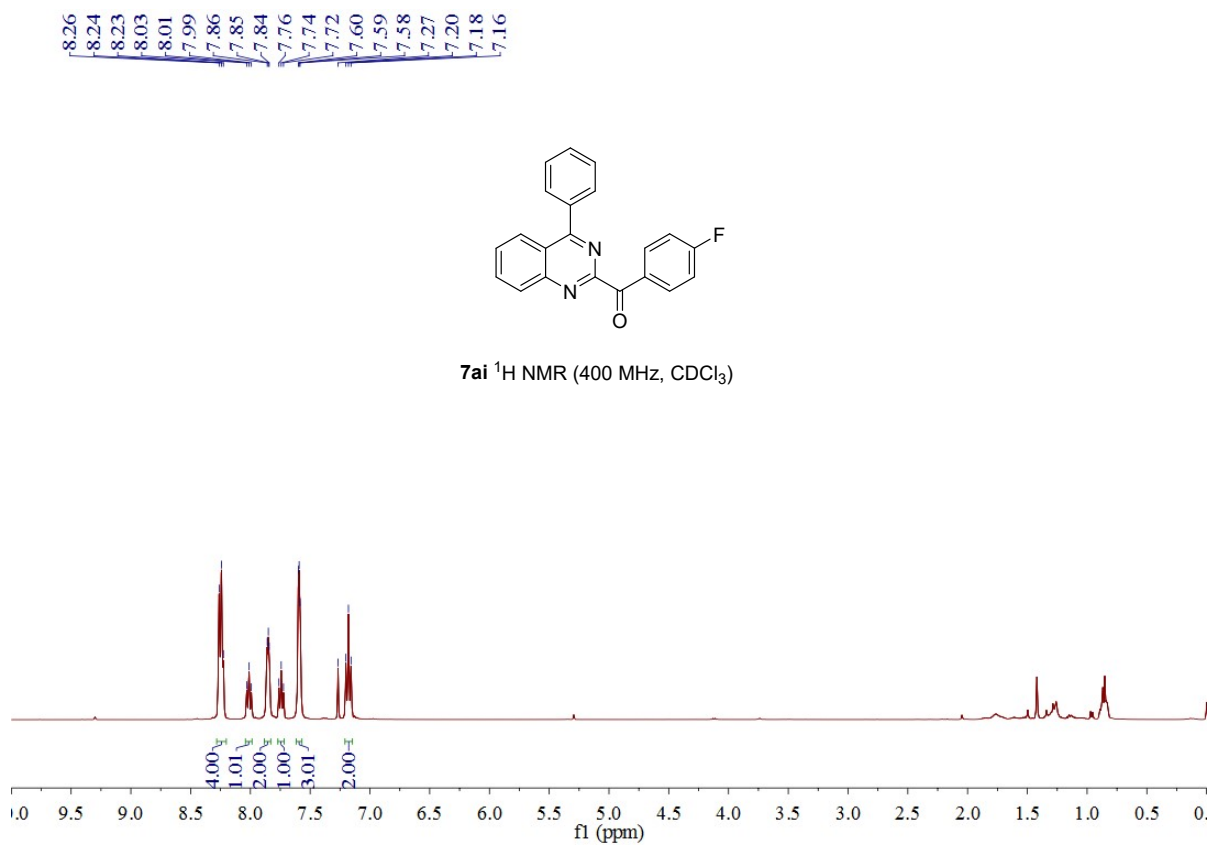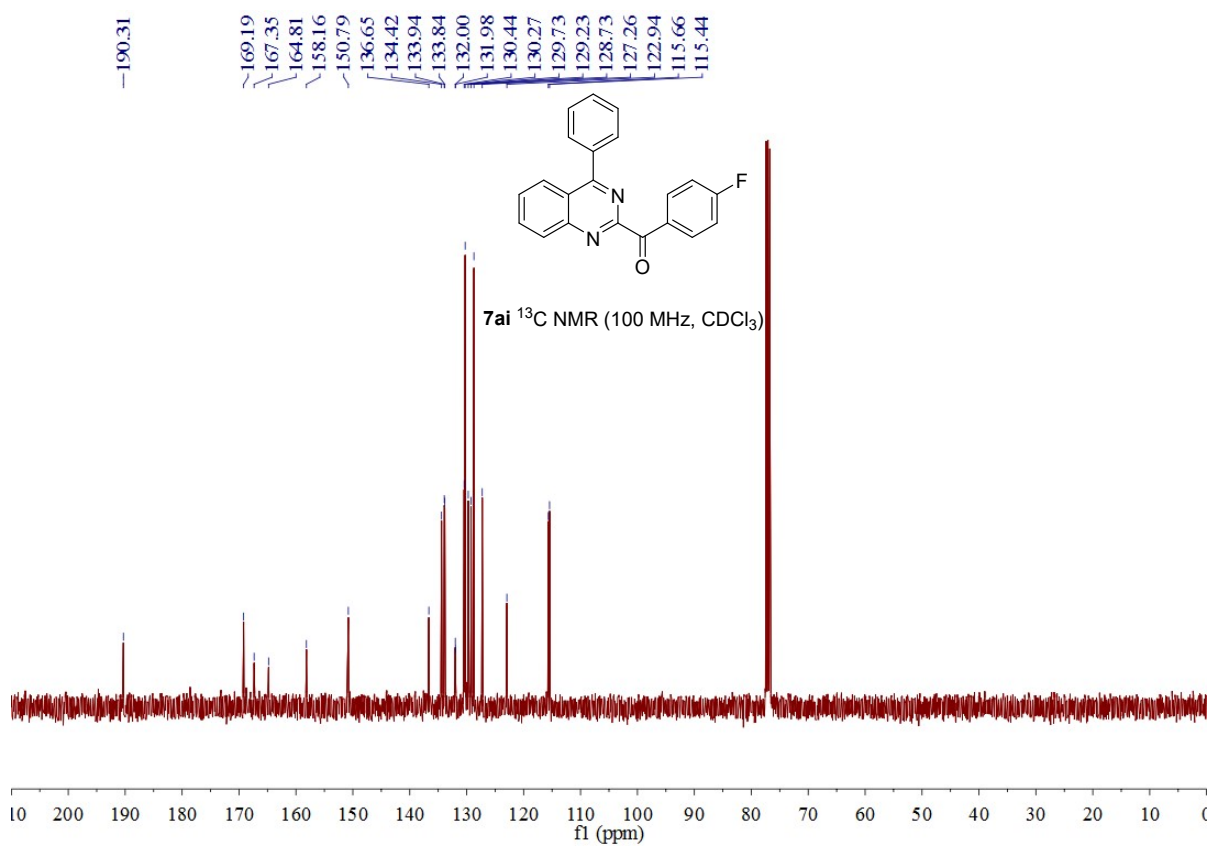

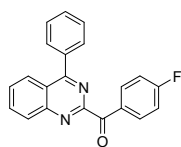

7ai <sup>19</sup>F NMR (376 MHz, CDCl<sub>3</sub>)

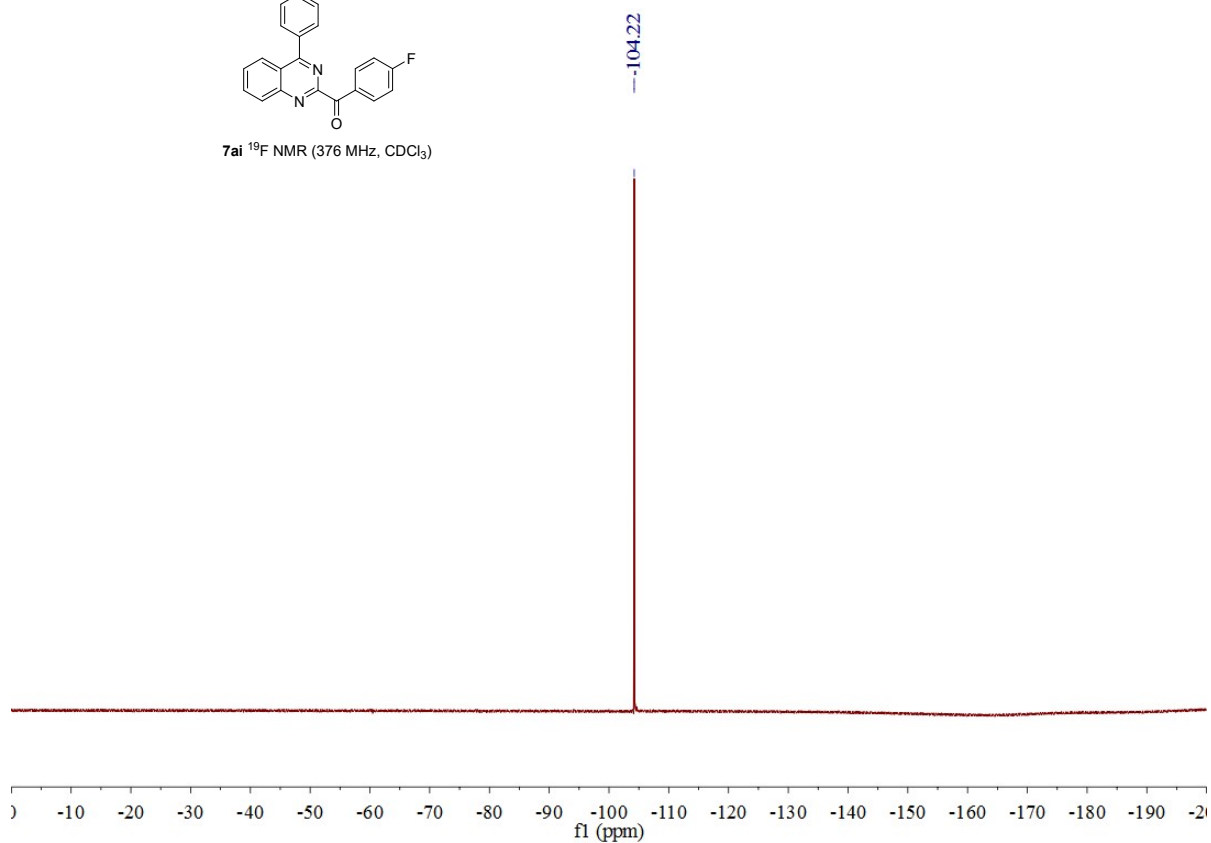

8.257  
8.237  
8.161  
8.139  
8.022  
8.004  
7.986  
7.852  
7.843  
7.755  
7.737  
7.719  
7.593  
7.587  
7.487  
7.466  
7.263

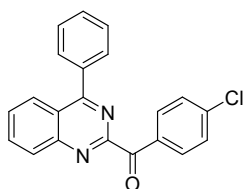

7aj <sup>1</sup>H NMR (400 MHz, CDCl<sub>3</sub>)

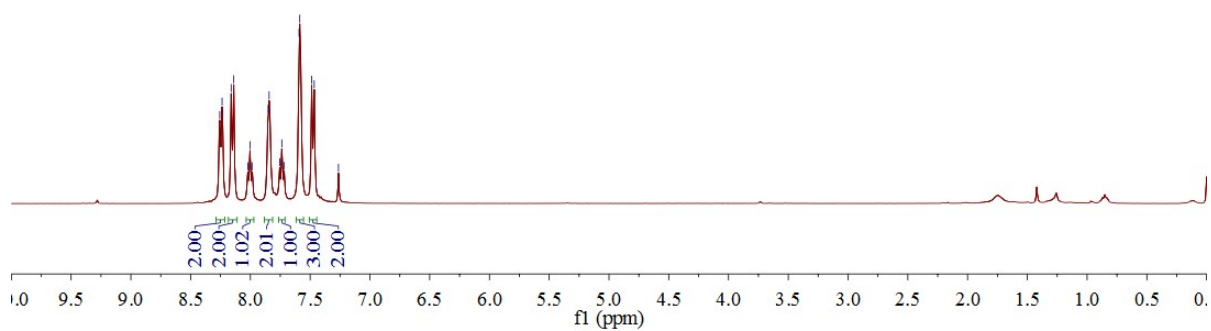

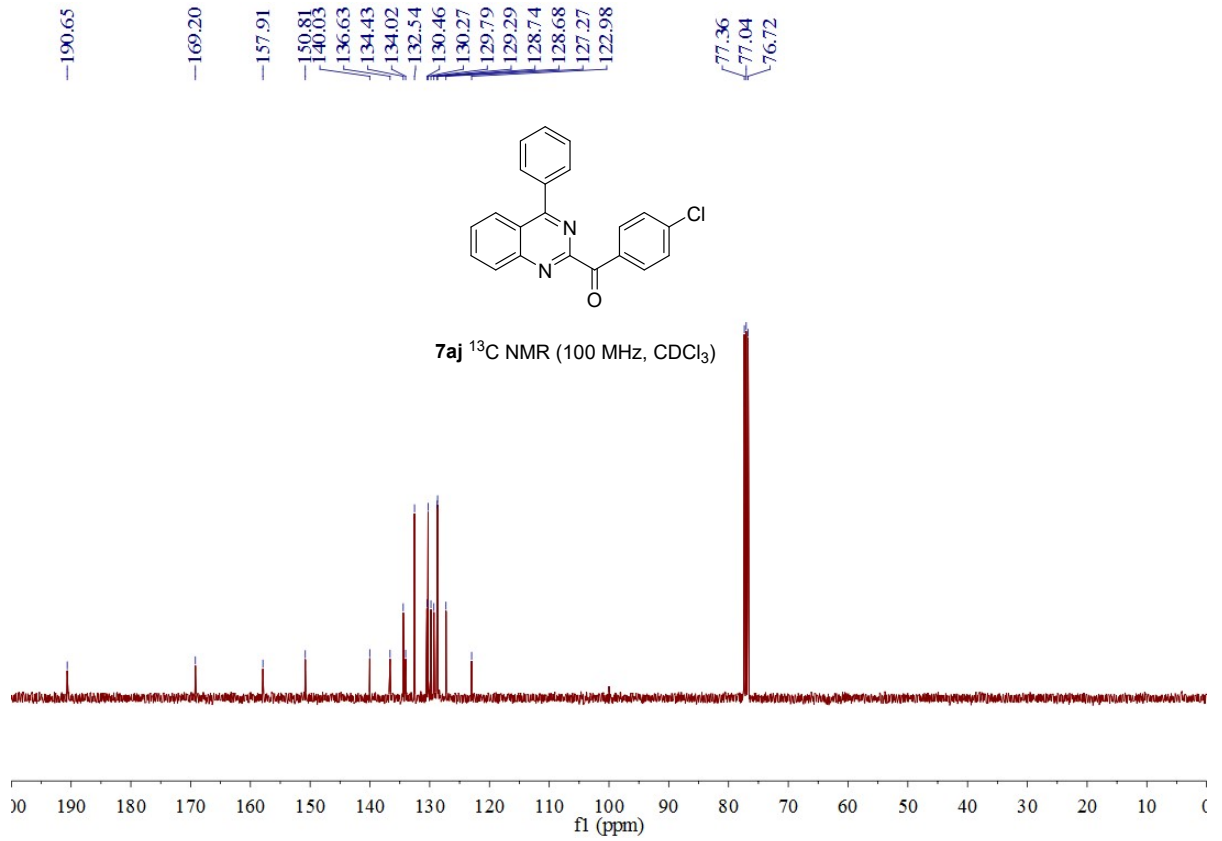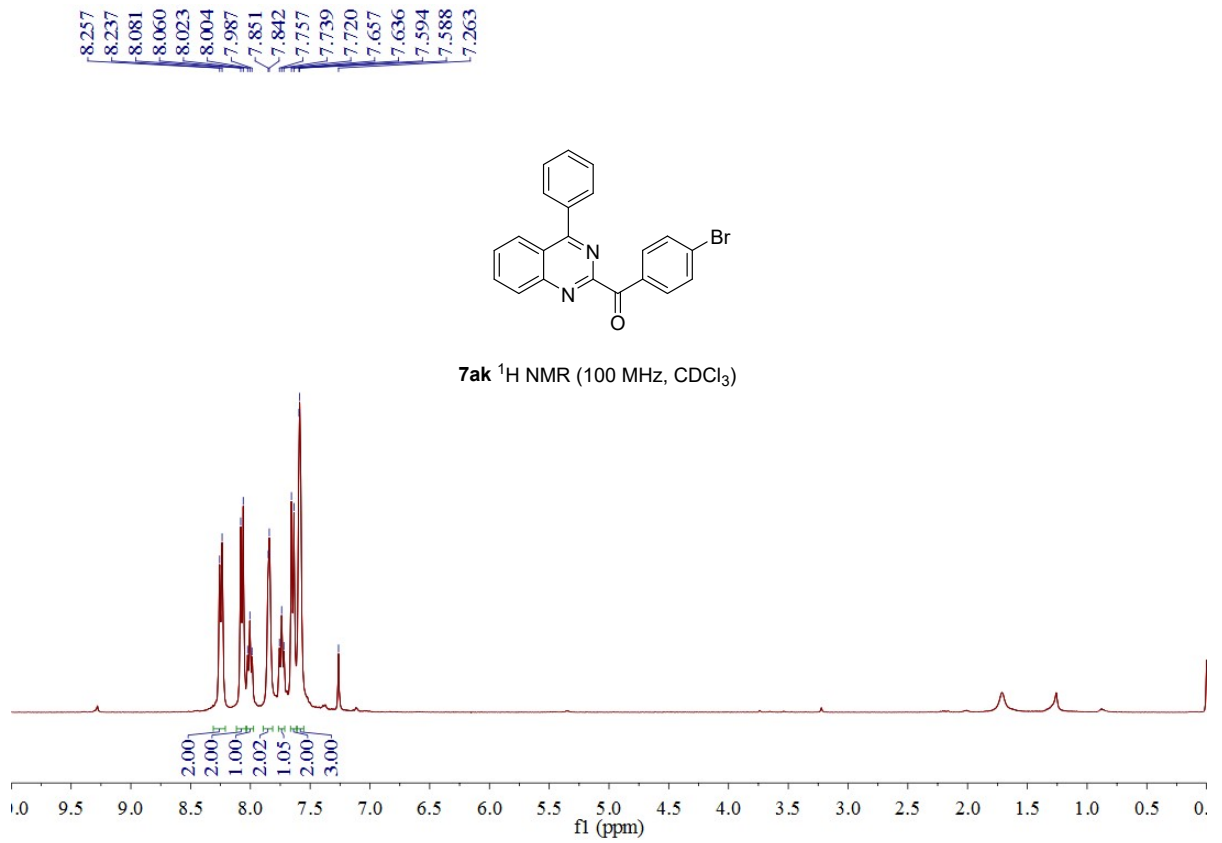

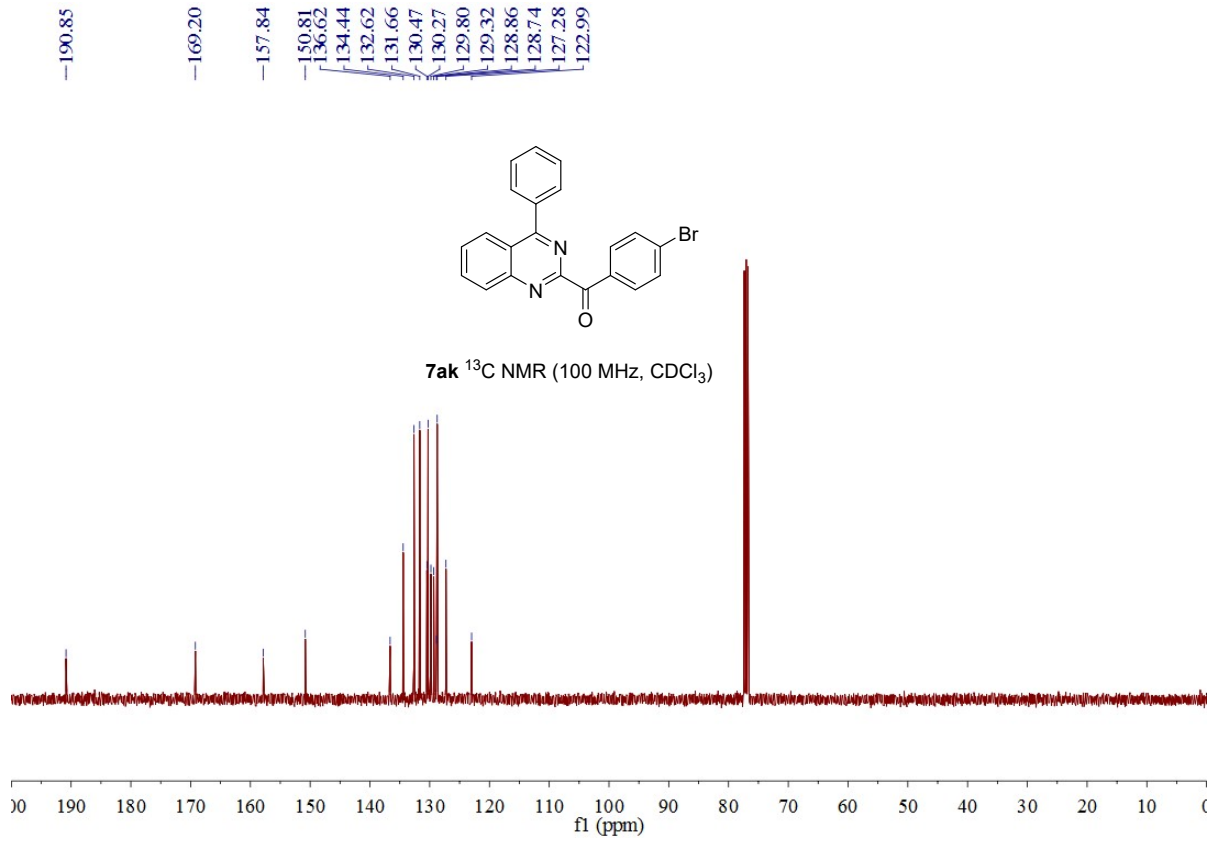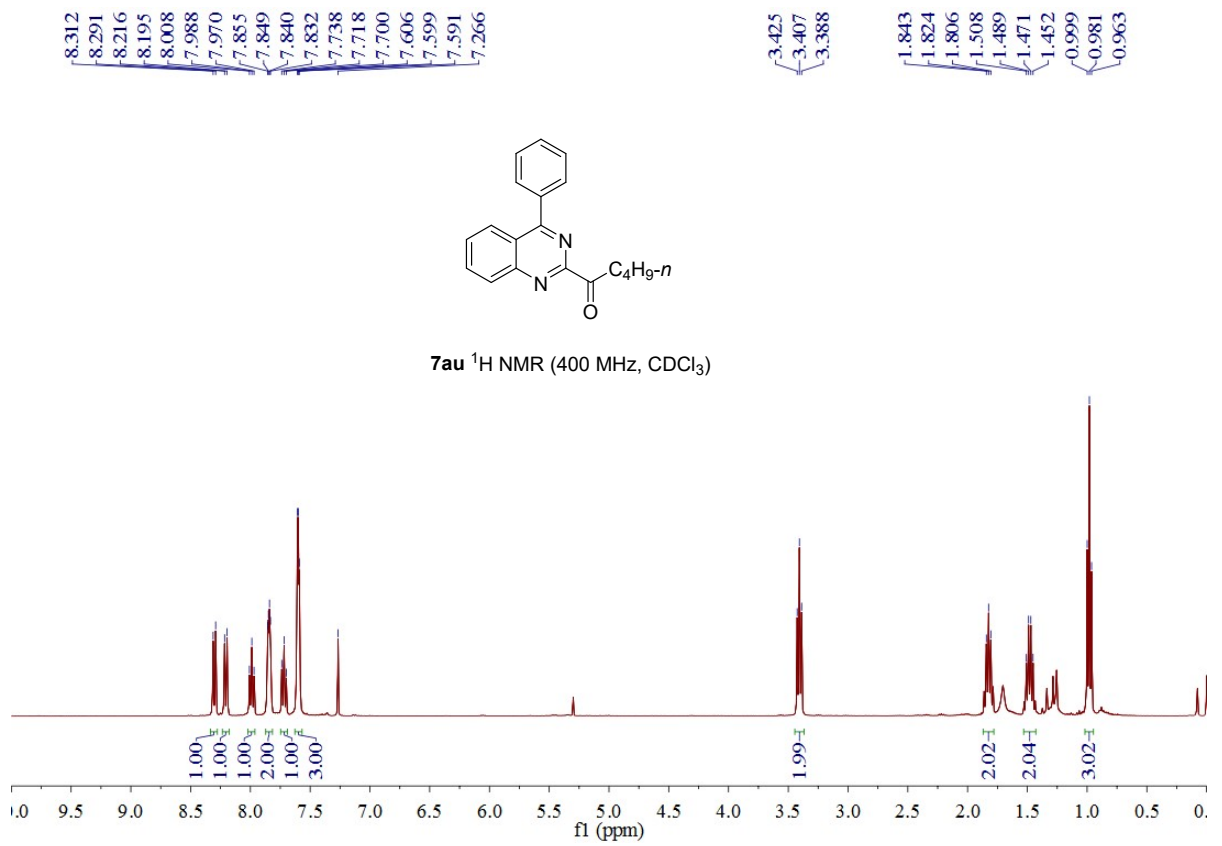

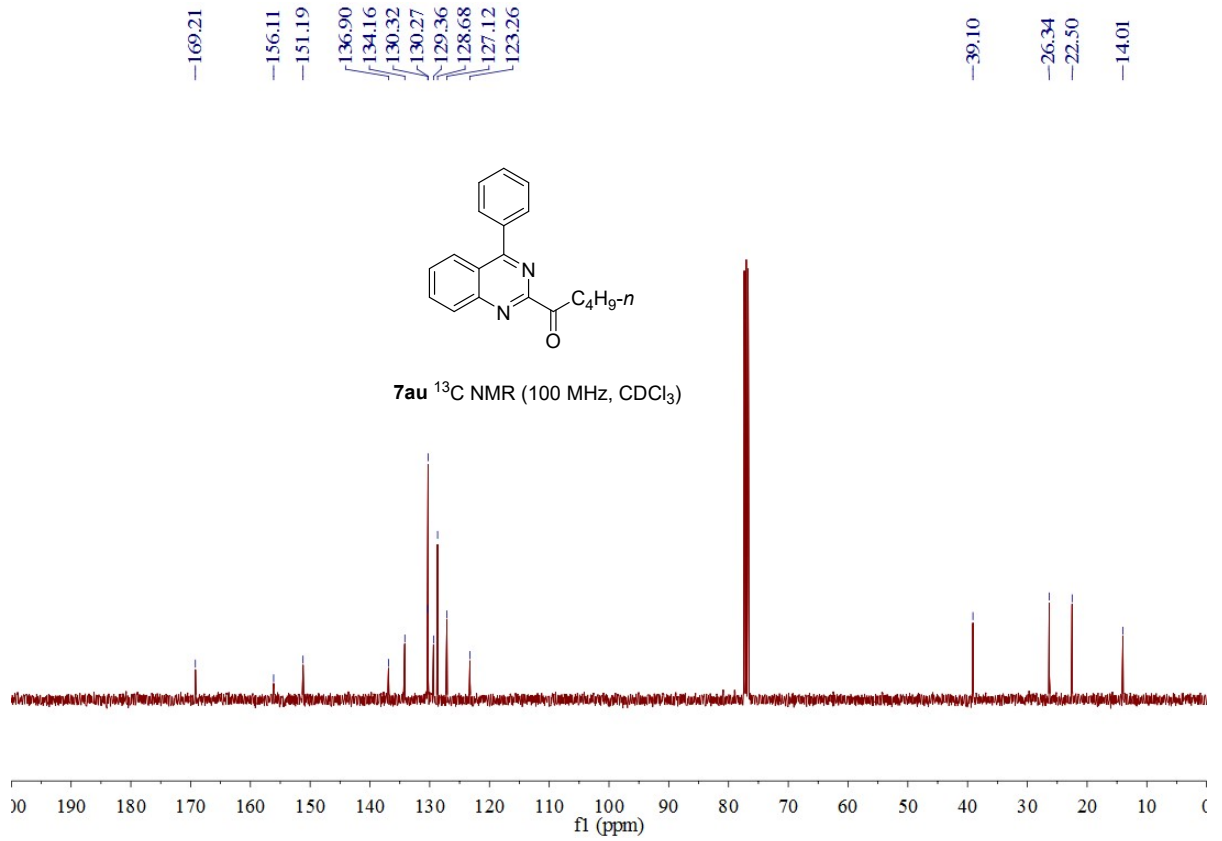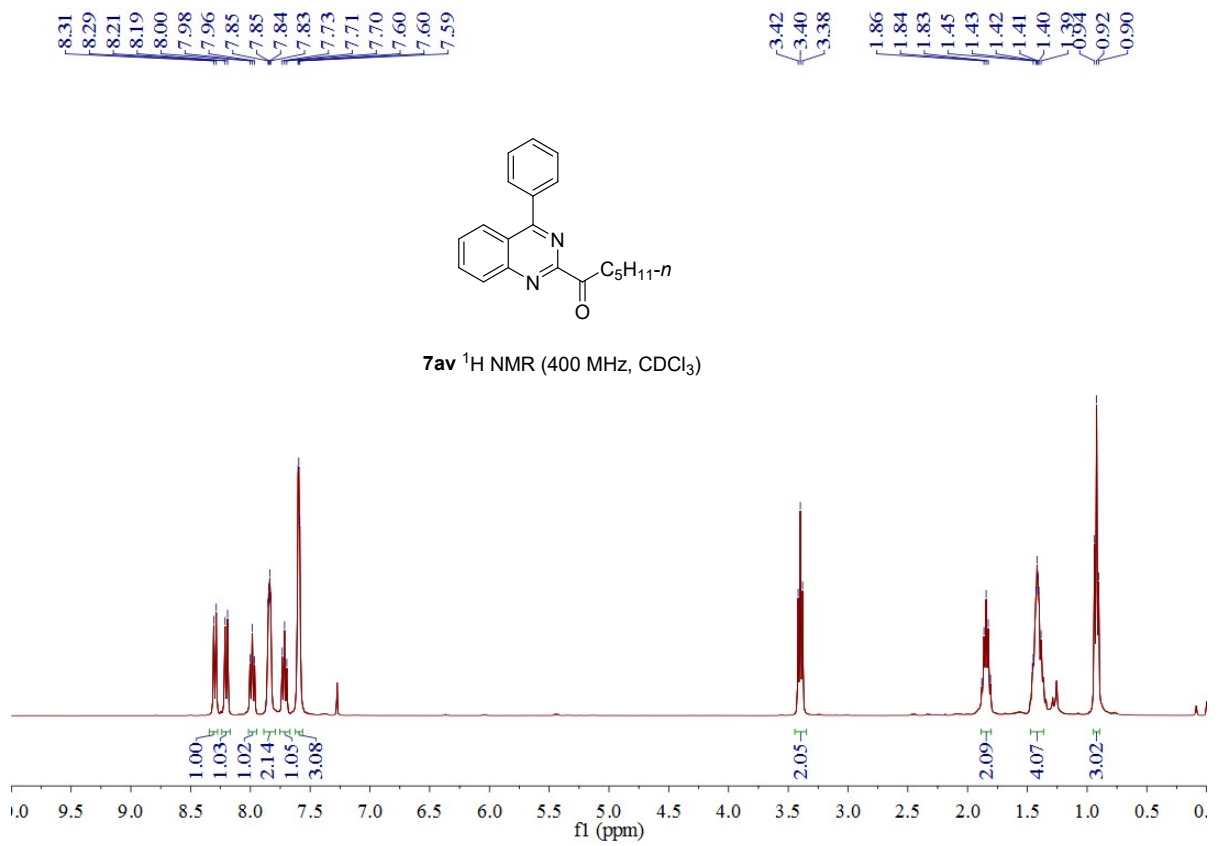

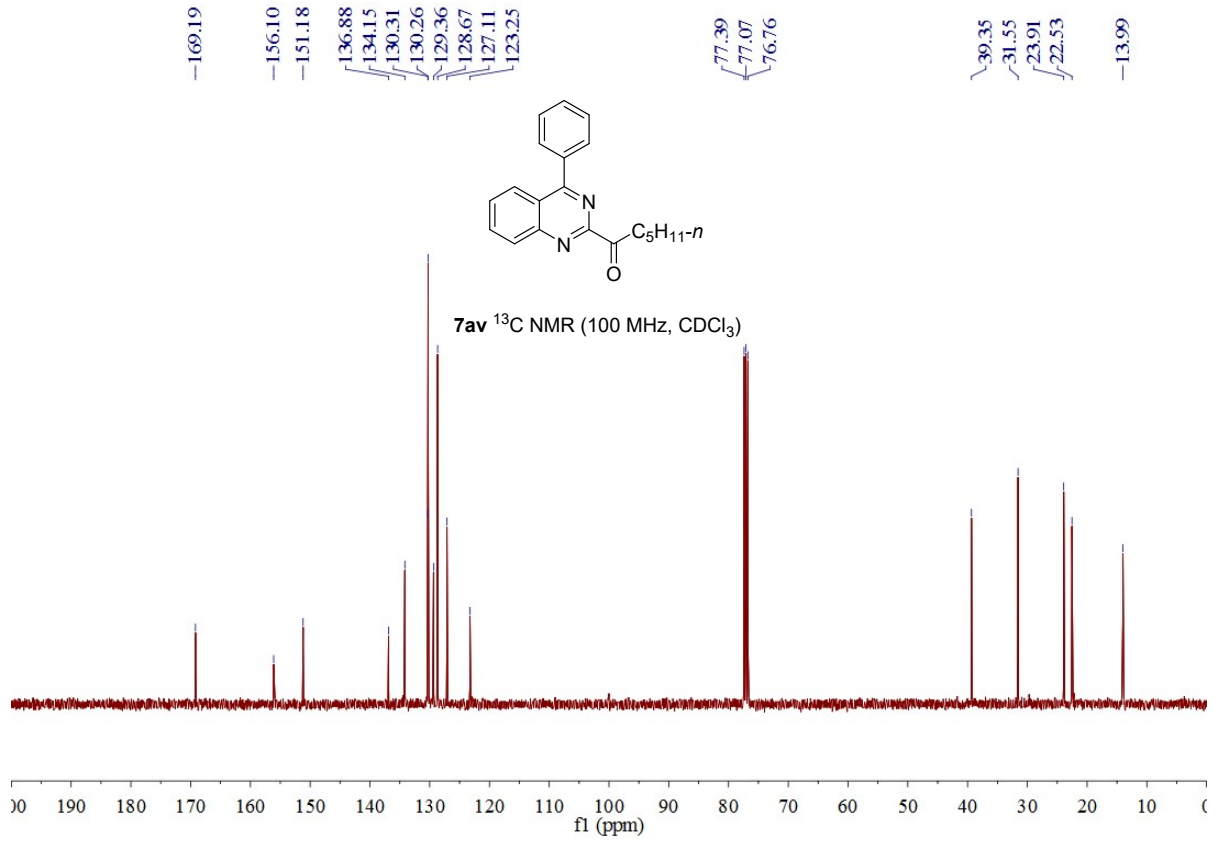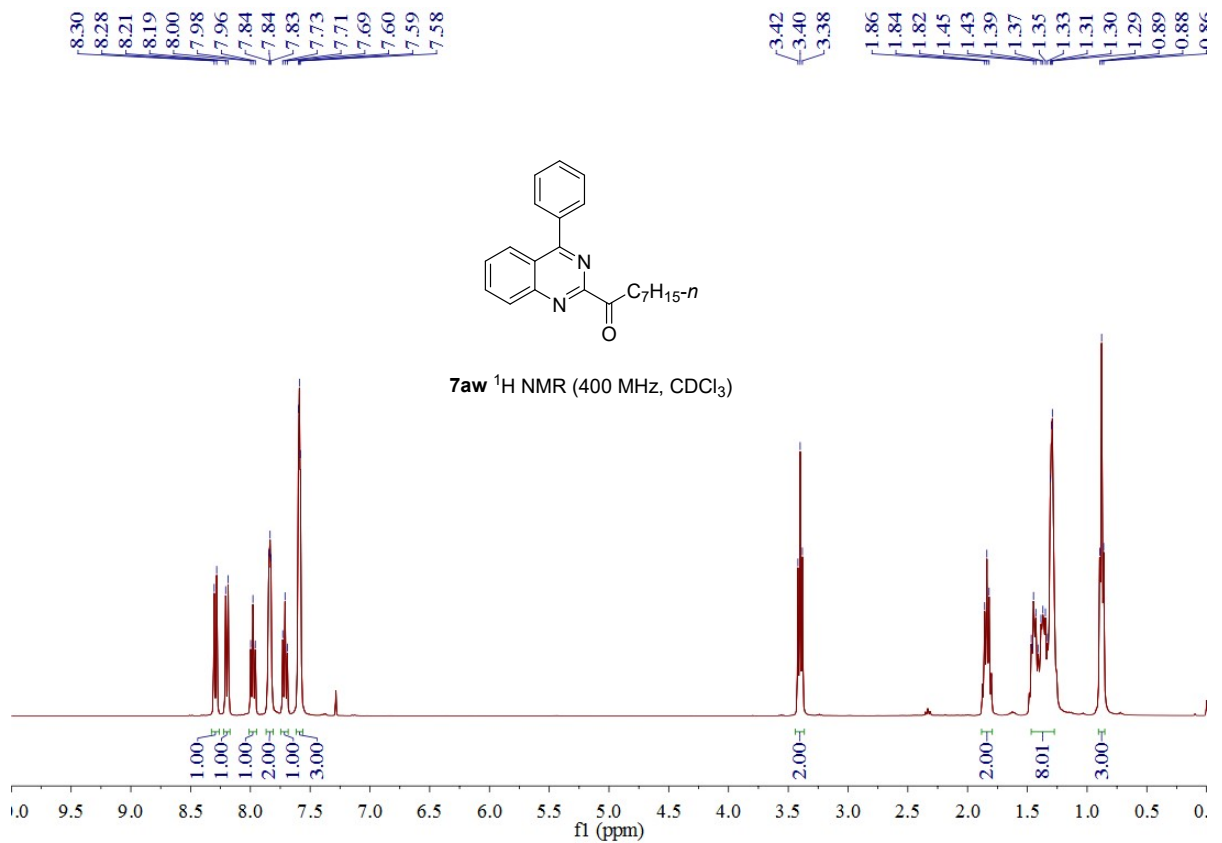

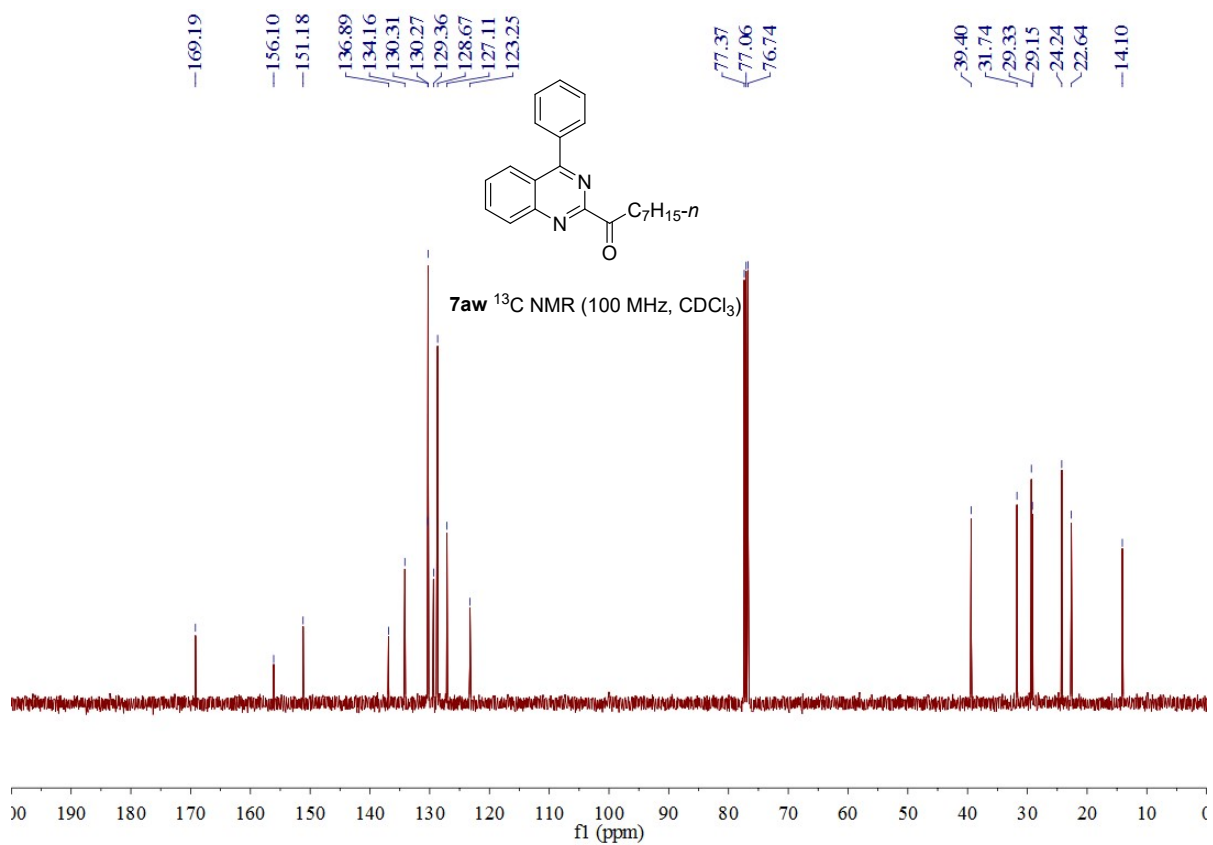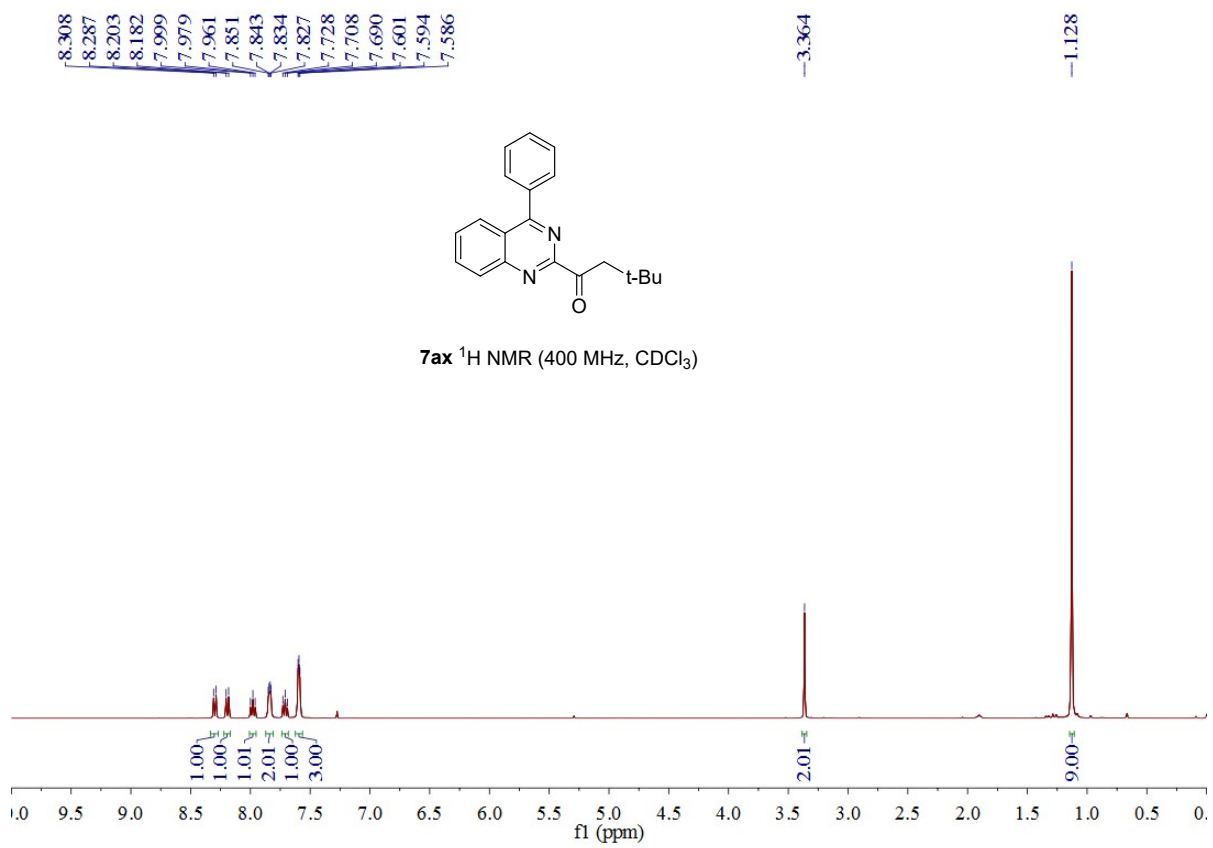

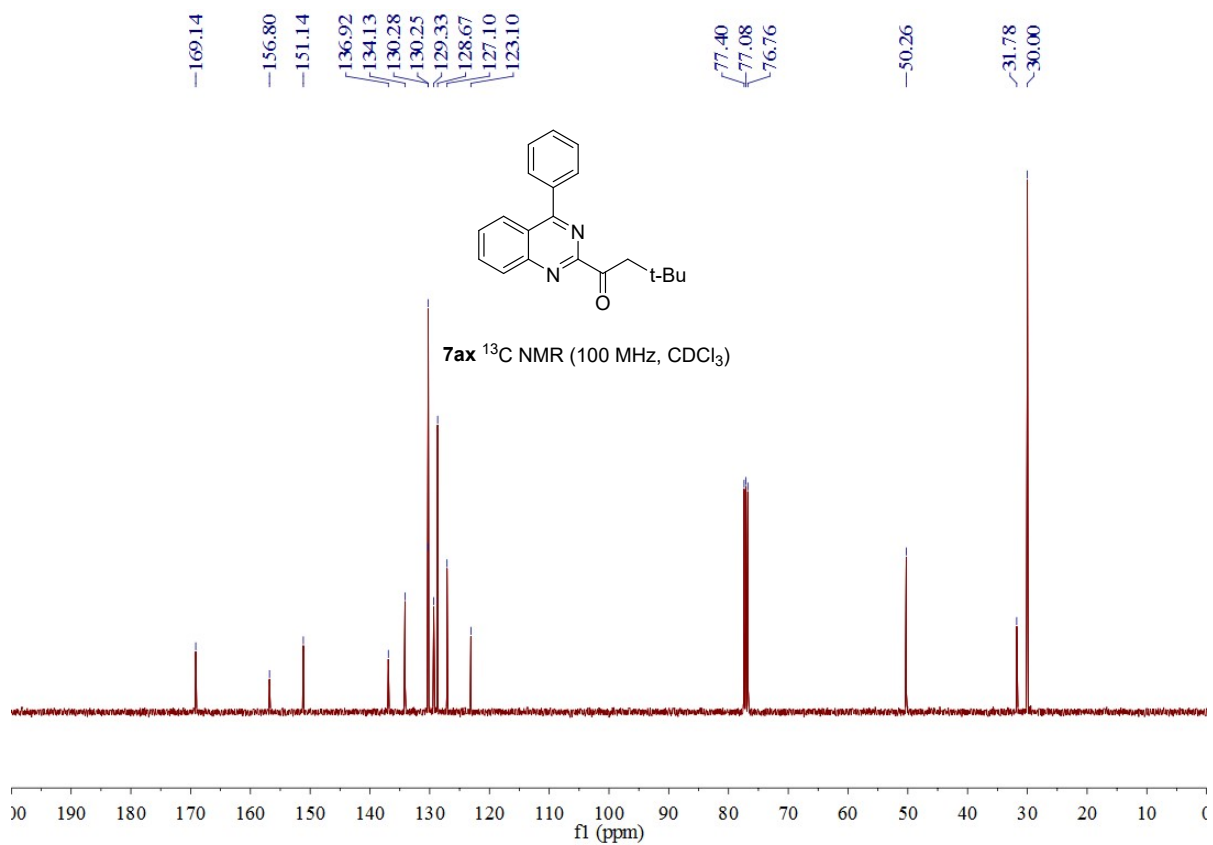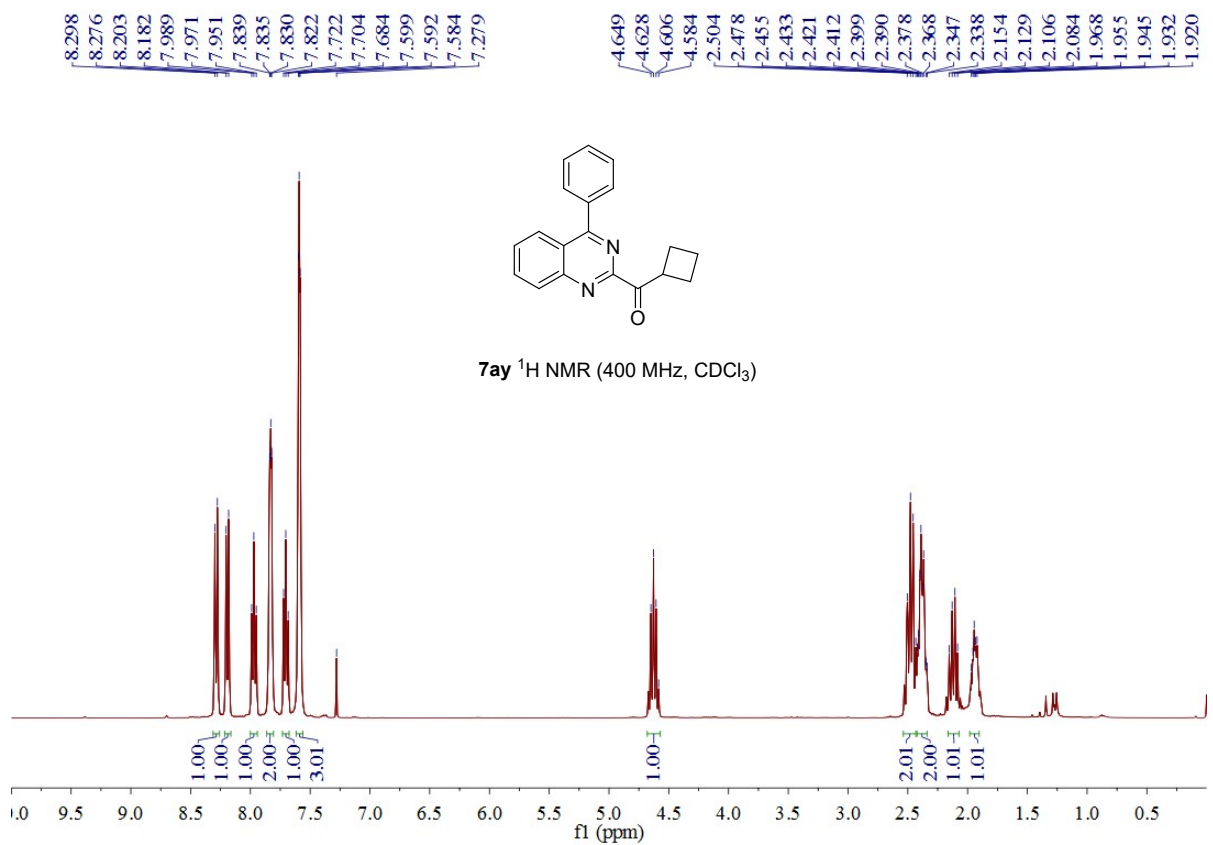



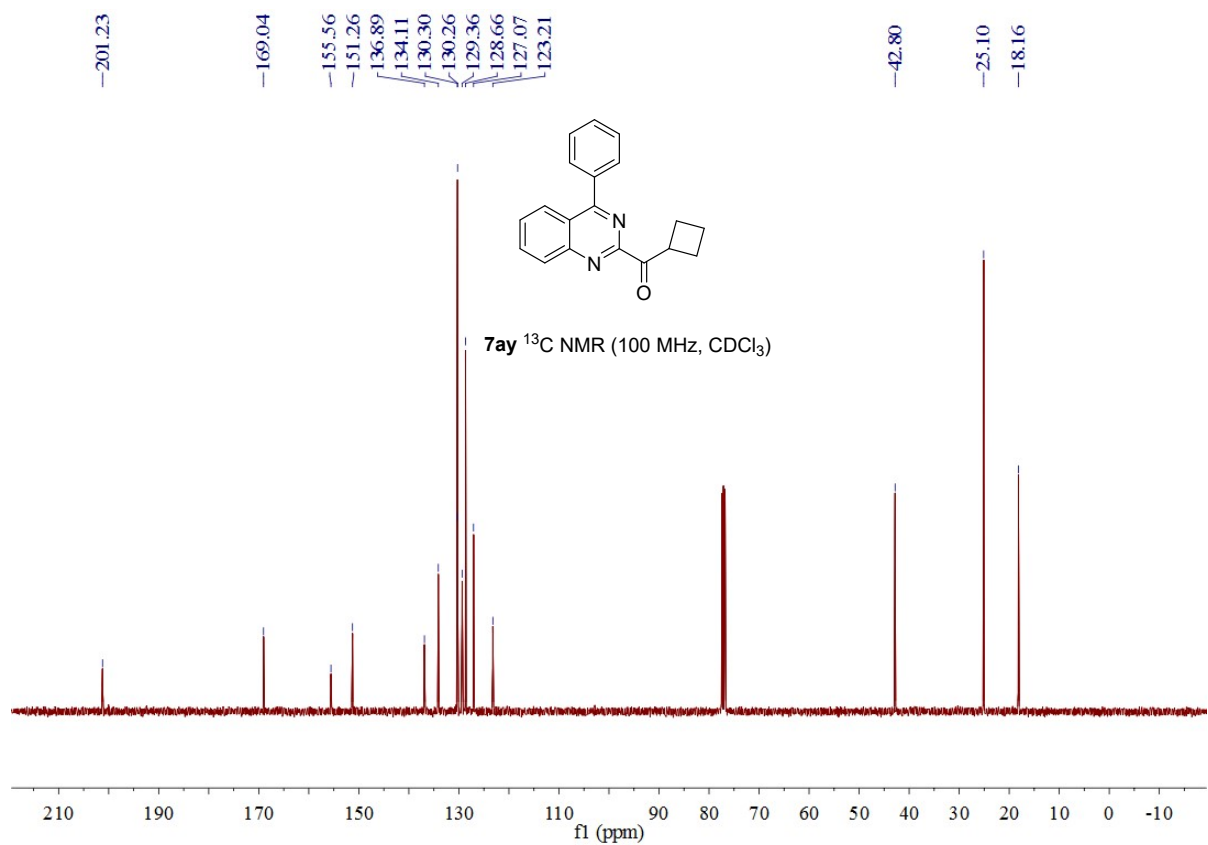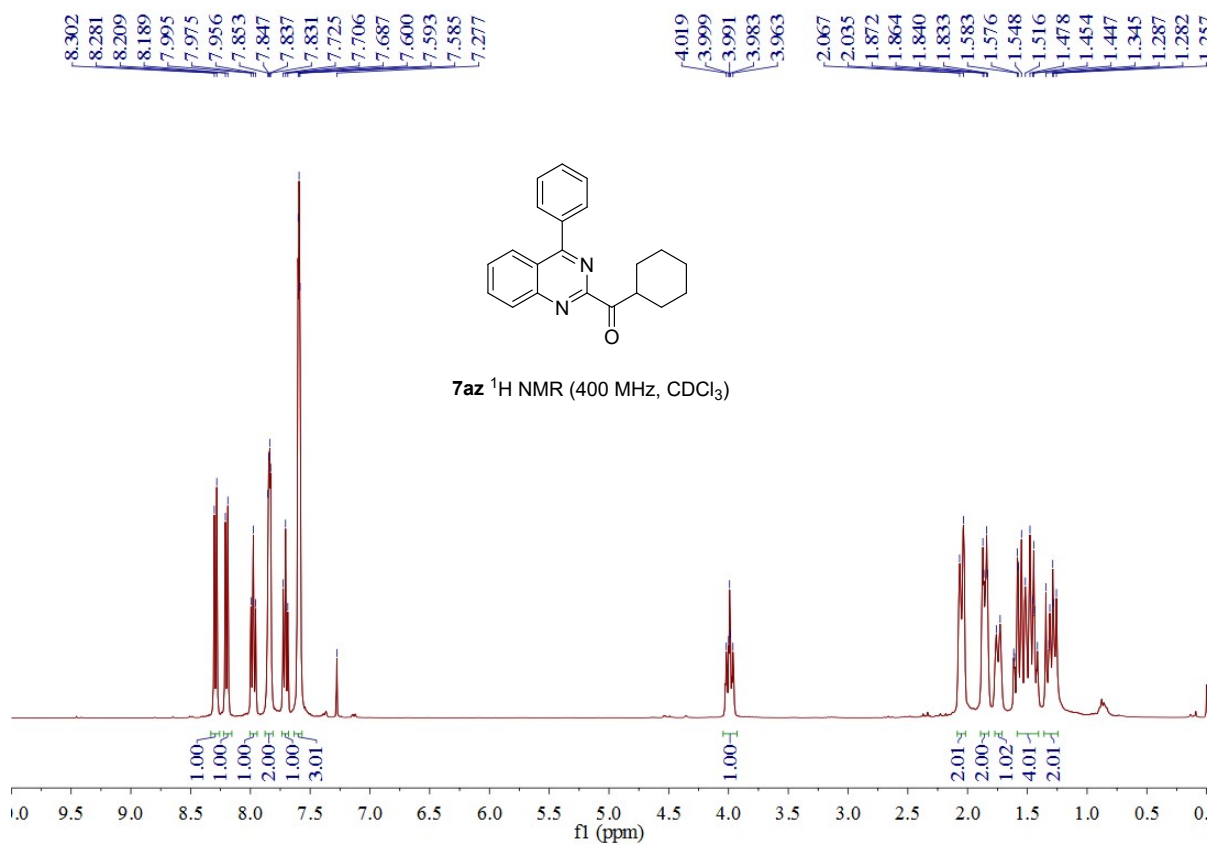

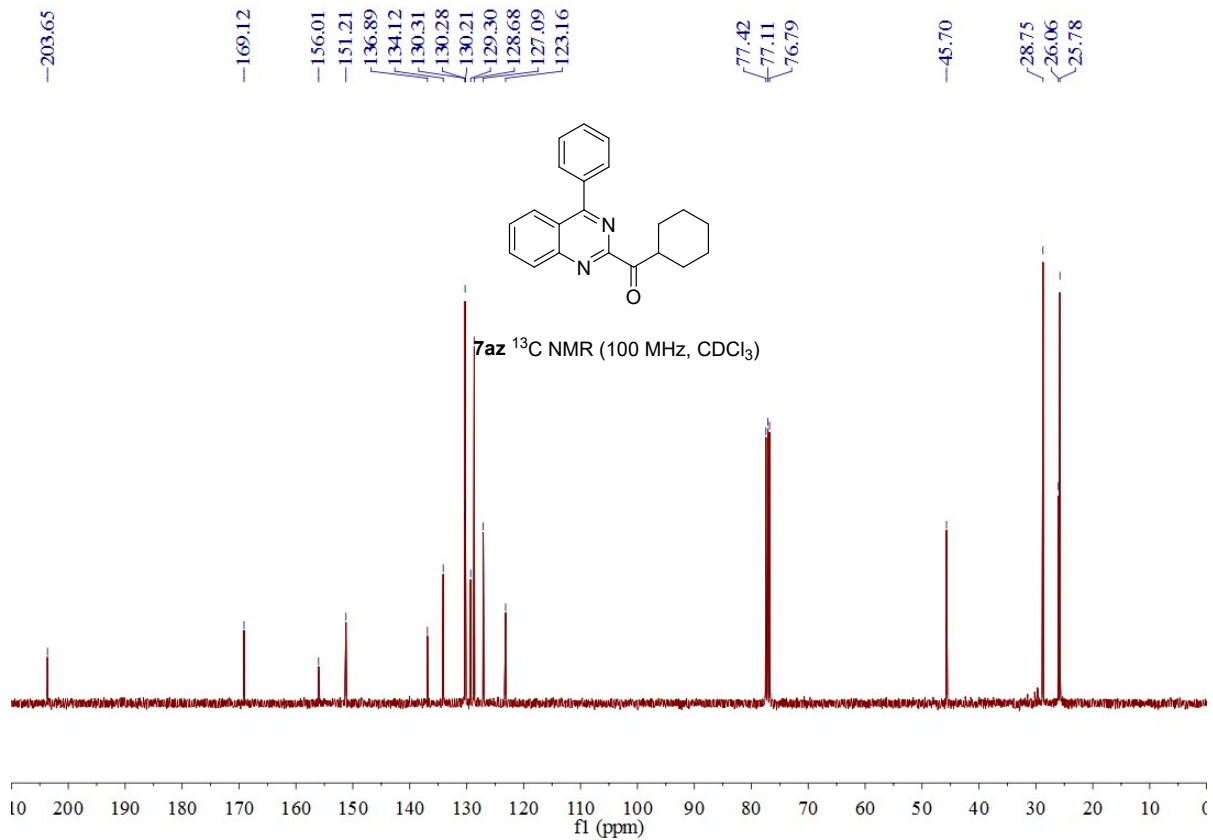

### Copy of Products 9 NMR

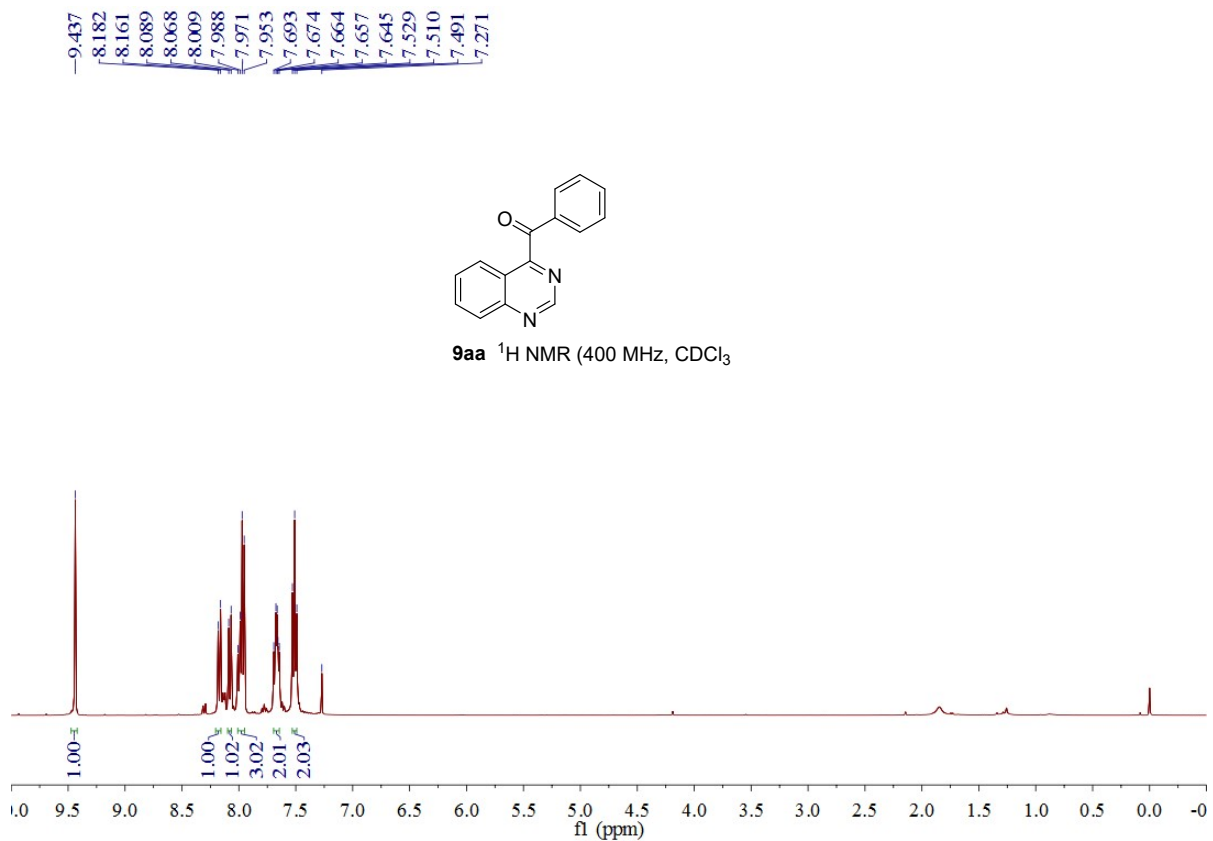

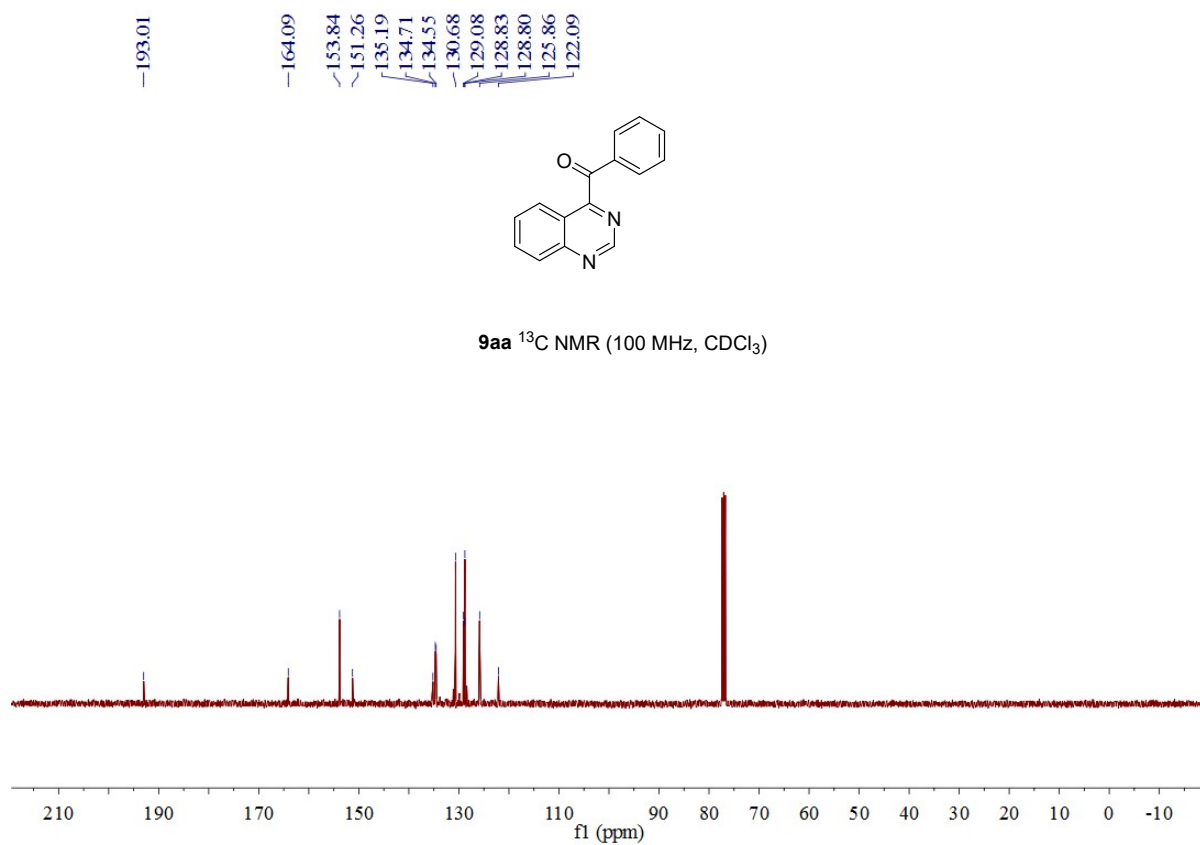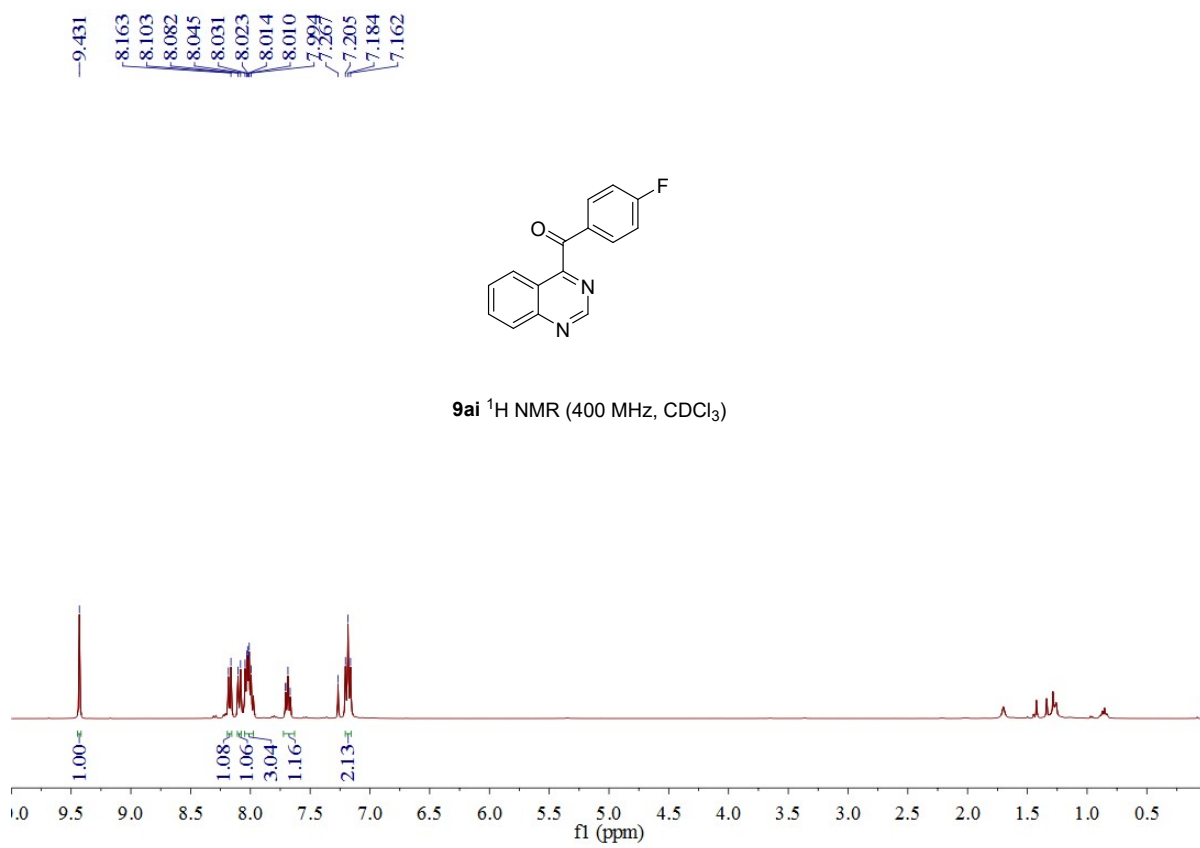

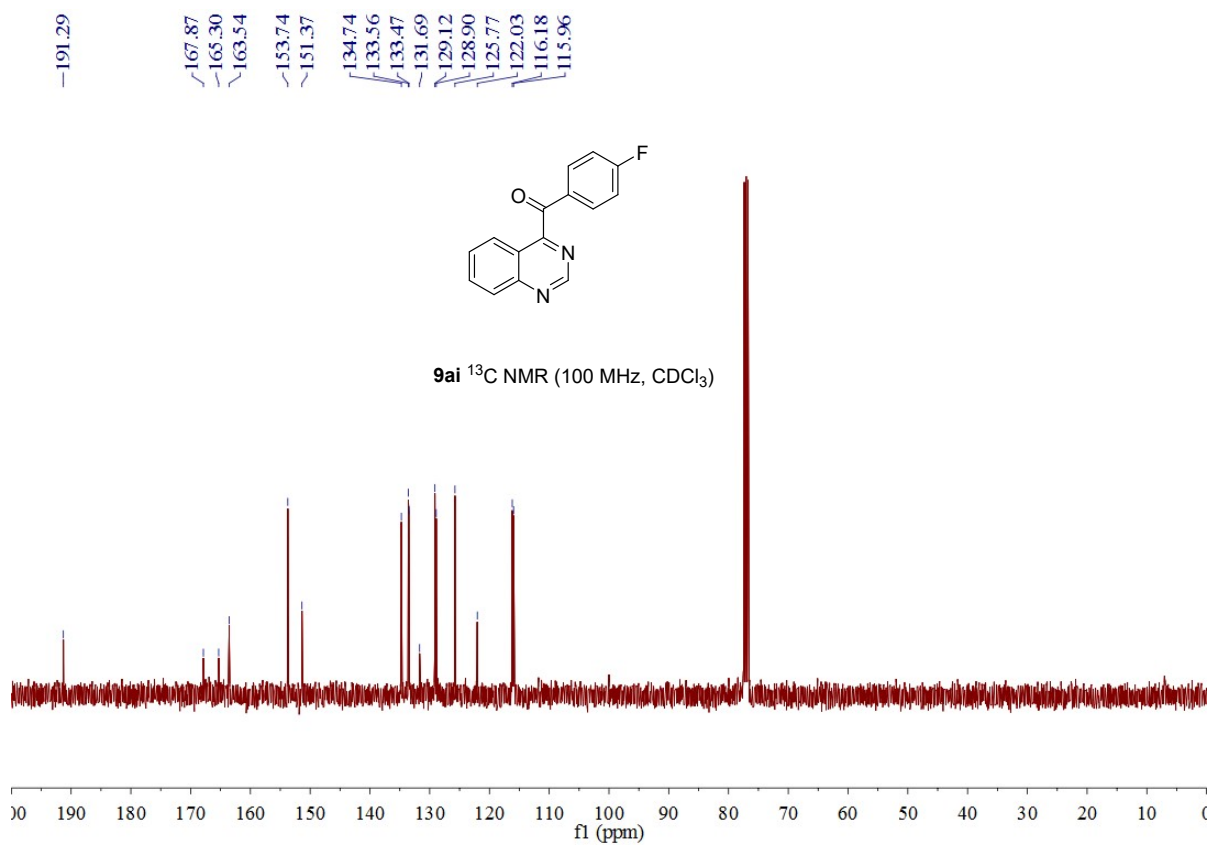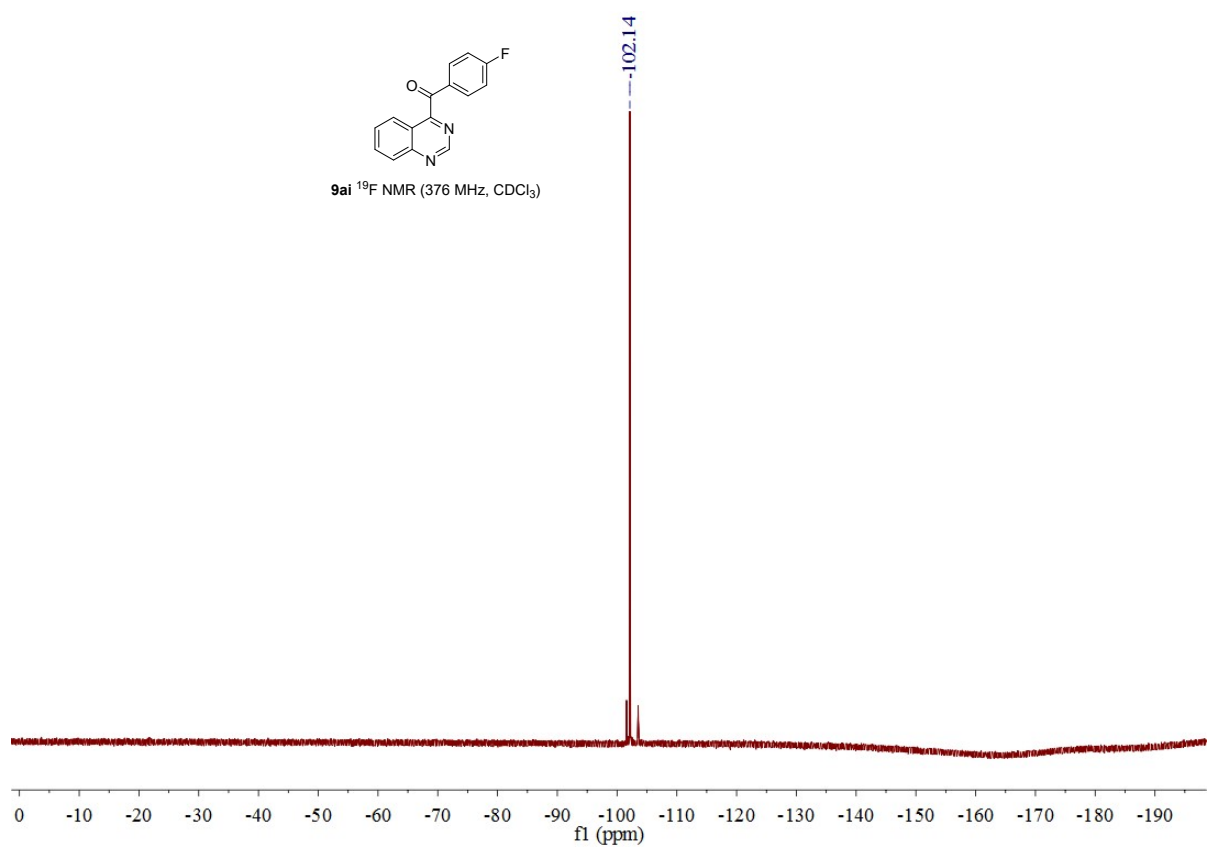

9.435  
8.189  
8.168  
8.114  
8.094  
8.023  
8.003  
7.985  
7.943  
7.922  
7.716  
7.696  
7.678  
7.501  
7.479  
7.268

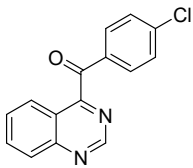

9aj <sup>1</sup>H NMR (400 MHz, CDCl<sub>3</sub>)

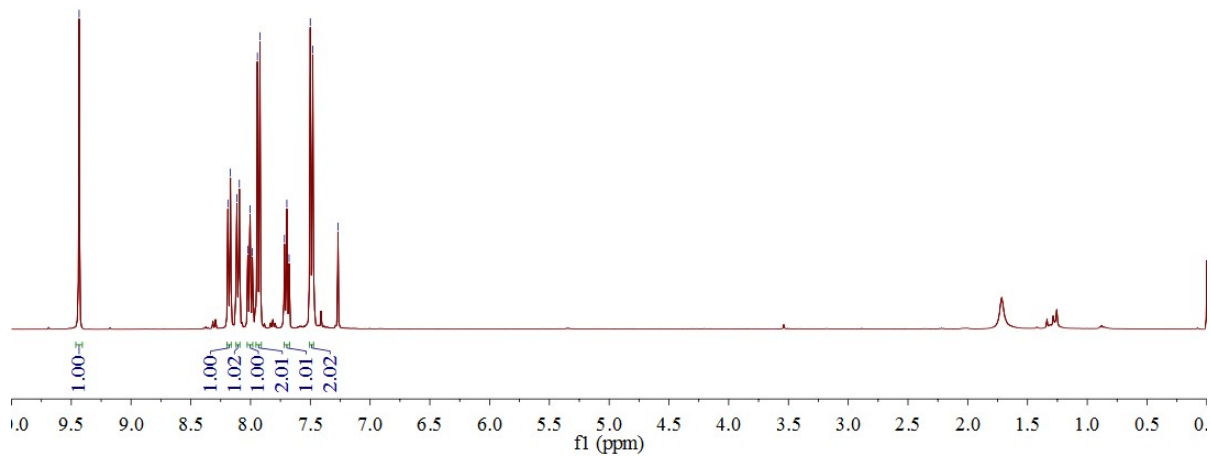

191.71  
163.23  
153.74  
151.41  
141.20  
134.80  
133.57  
132.06  
129.15  
128.99  
125.75  
122.03

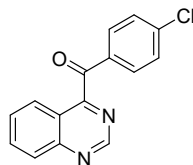

9aj <sup>13</sup>C NMR (100 MHz, CDCl<sub>3</sub>)

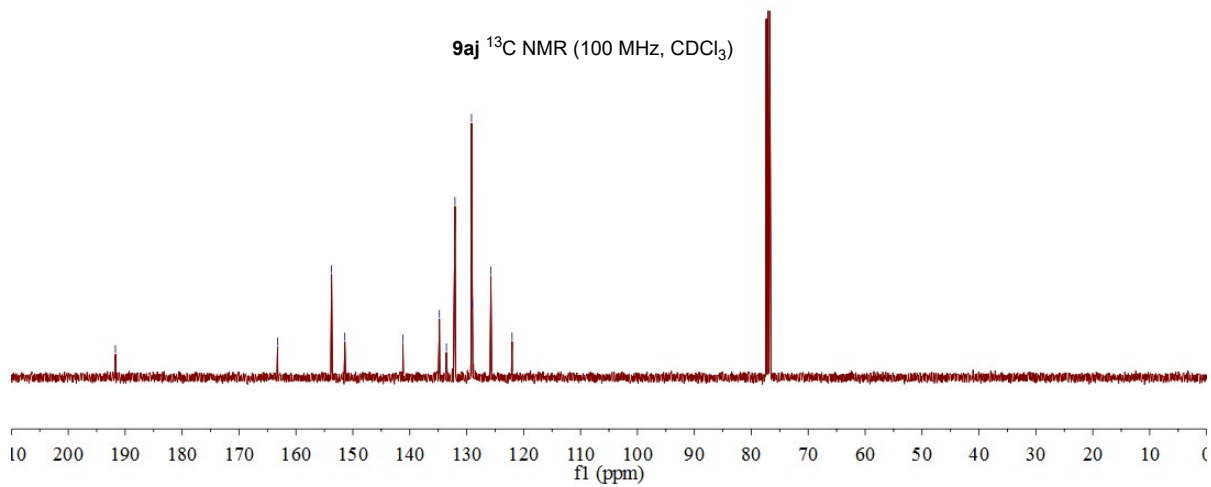

9.369  
8.126  
8.105  
8.052  
8.031  
7.958  
7.938  
7.920  
7.797  
7.776  
7.650  
7.632  
7.607  
7.586  
7.203

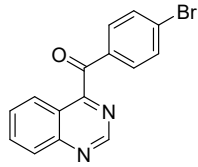

**9ak**  $^1\text{H}$  NMR (400 MHz,  $\text{CDCl}_3$ )

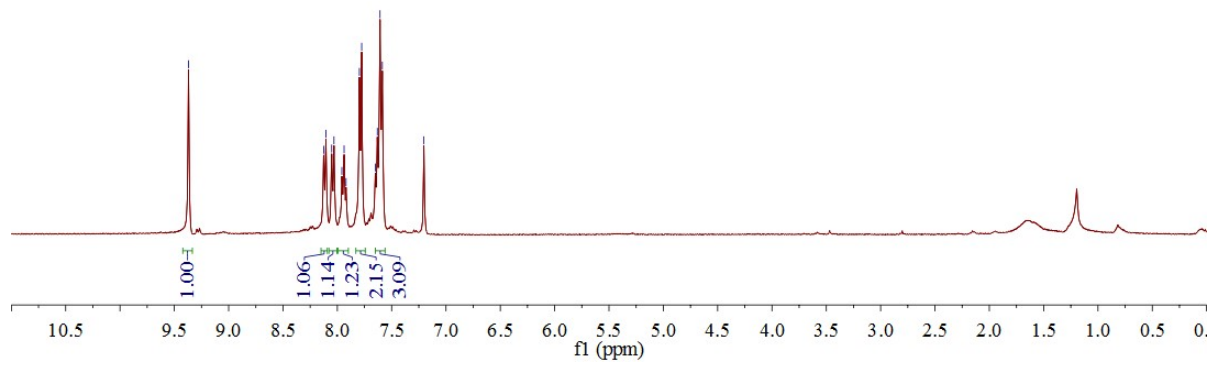

191.91  
163.16  
153.74  
151.45  
134.76  
134.03  
132.13  
132.07  
130.05  
129.16  
128.97  
125.73  
122.03

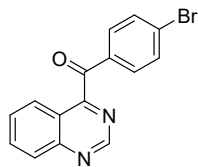

**9ak**  $^{13}\text{C}$  NMR (100 MHz,  $\text{CDCl}_3$ )

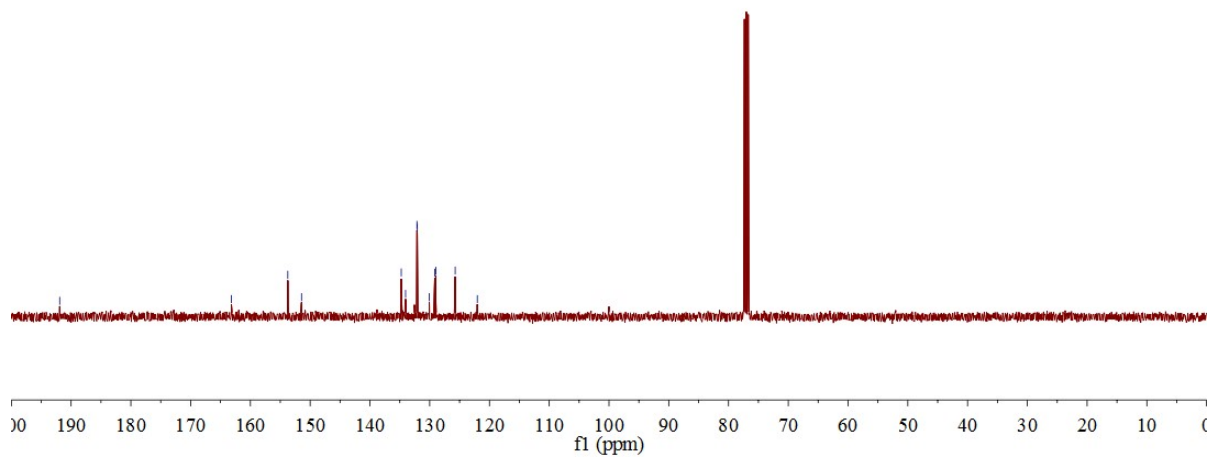

9.442  
8.192  
8.170  
8.116  
8.095  
8.022  
8.019  
8.001  
7.983  
7.981  
7.737  
7.717  
7.715  
7.697  
7.677  
7.496  
7.491  
7.477  
7.471  
7.457  
7.385  
7.382  
7.365  
7.361  
7.266

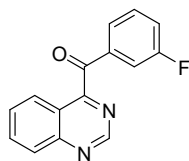

**9ao**  $^1\text{H}$  NMR (400 MHz,  $\text{CDCl}_3$ )

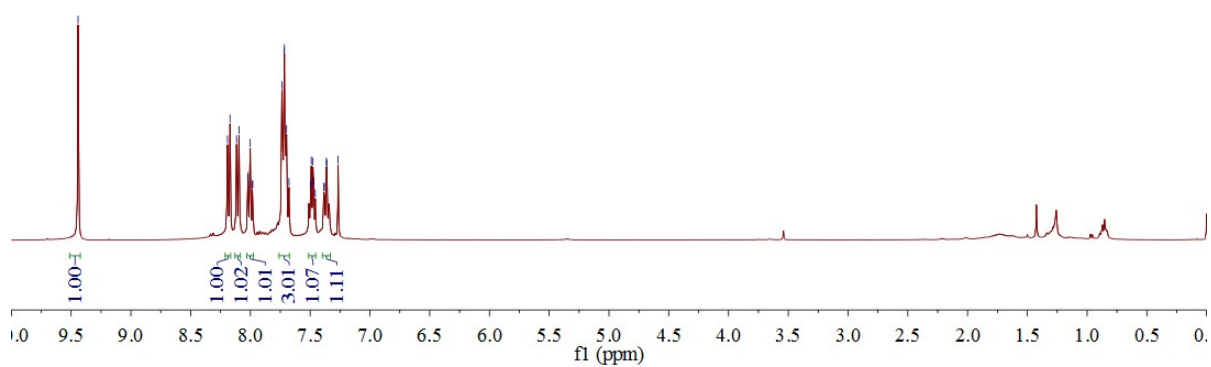

191.640  
163.958  
163.072  
161.485  
153.720  
151.428  
137.255  
137.190  
134.800  
130.497  
130.422  
129.162  
129.014  
126.699  
125.696  
121.995  
121.655  
121.439  
117.200  
116.974

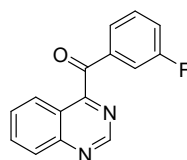

**9ao**  $^{13}\text{C}$  NMR (100 MHz,  $\text{CDCl}_3$ )

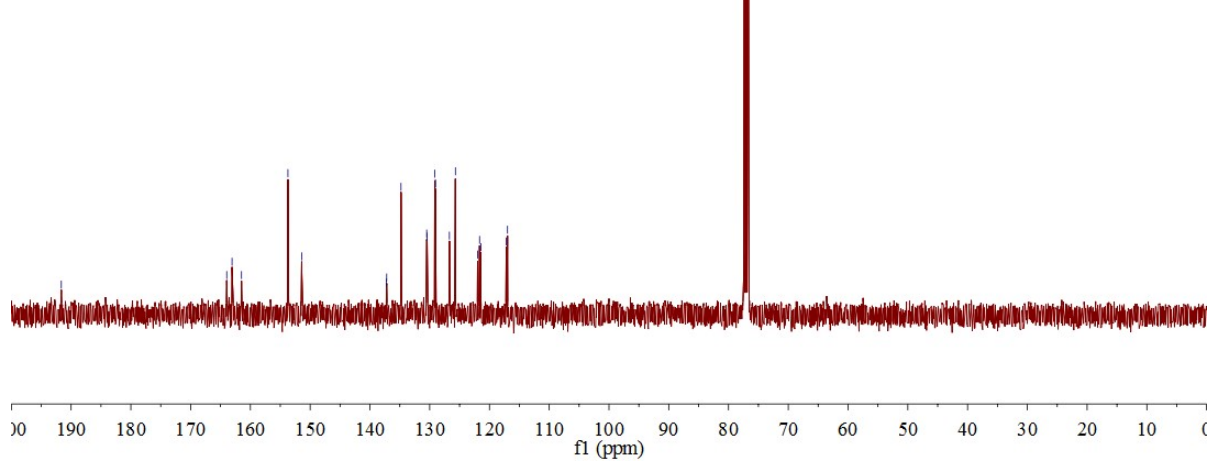

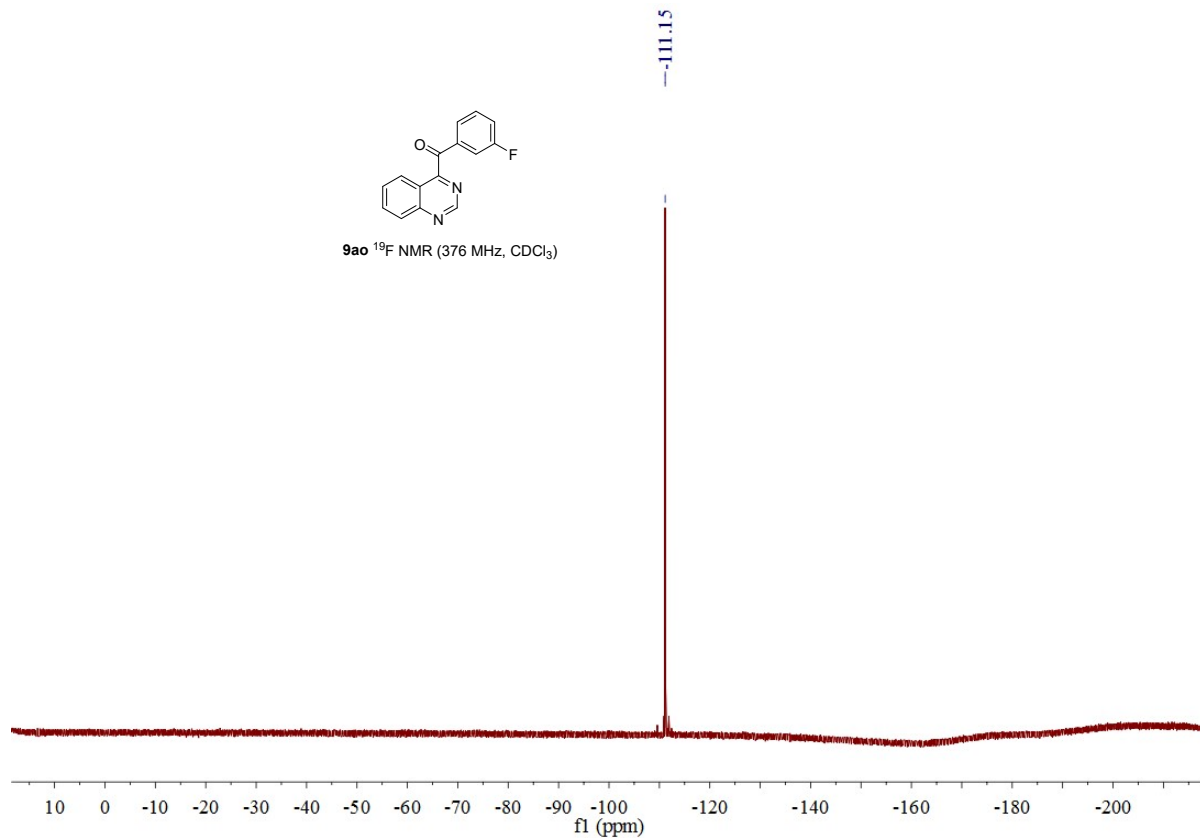

### Copy of Products 10 NMR

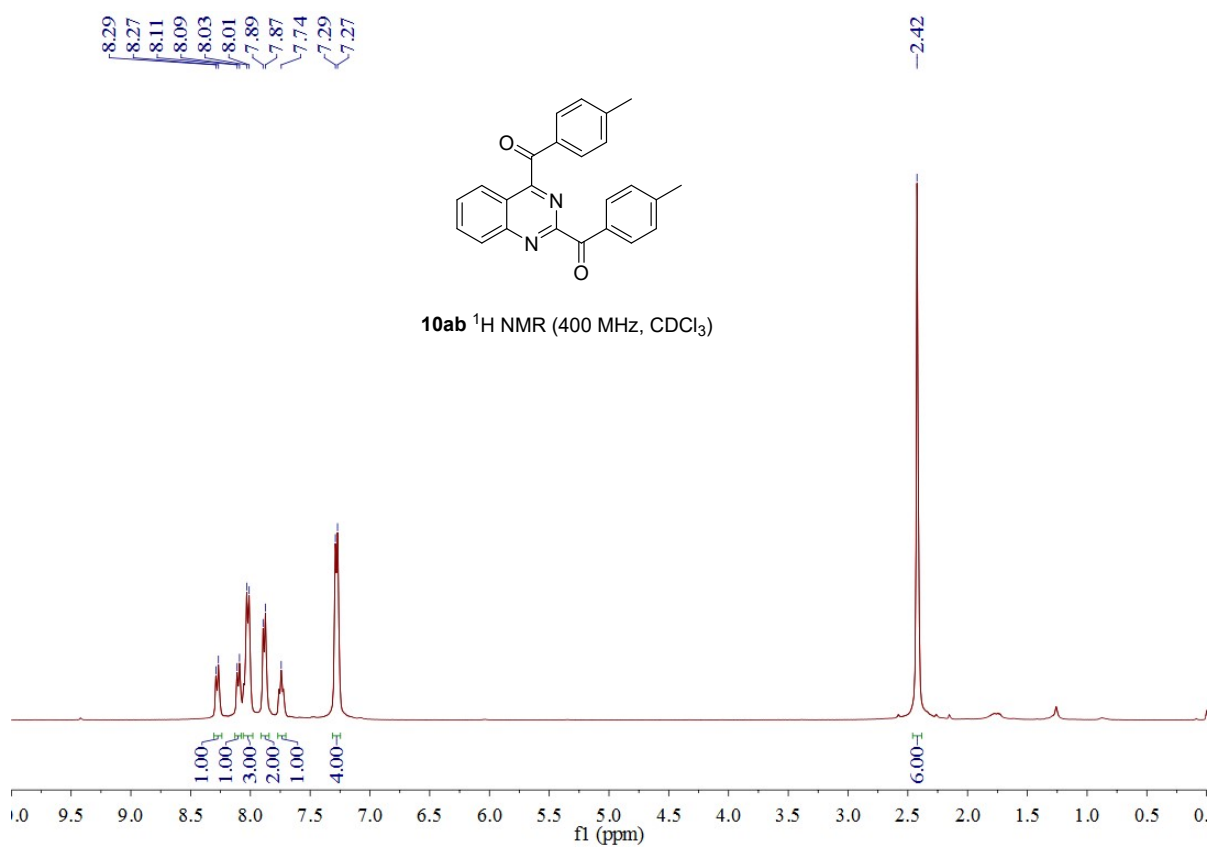



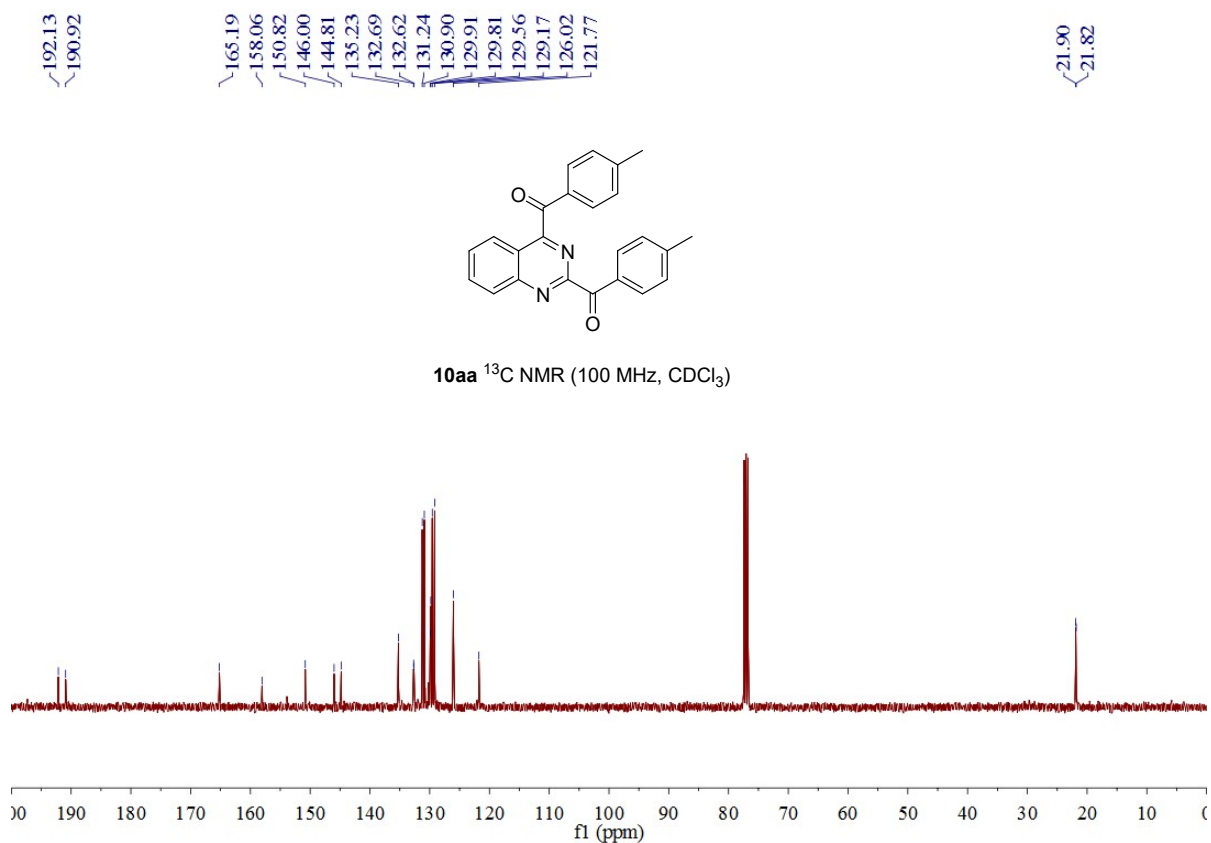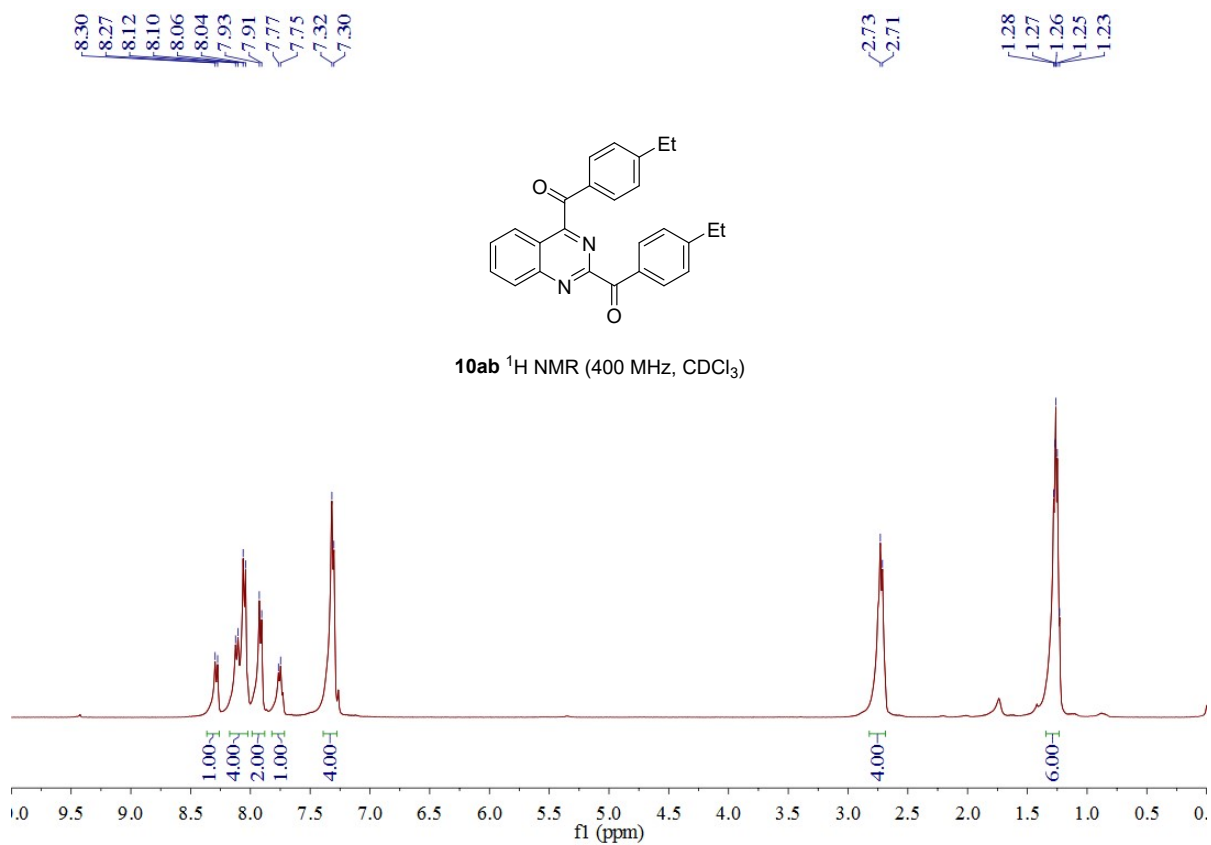

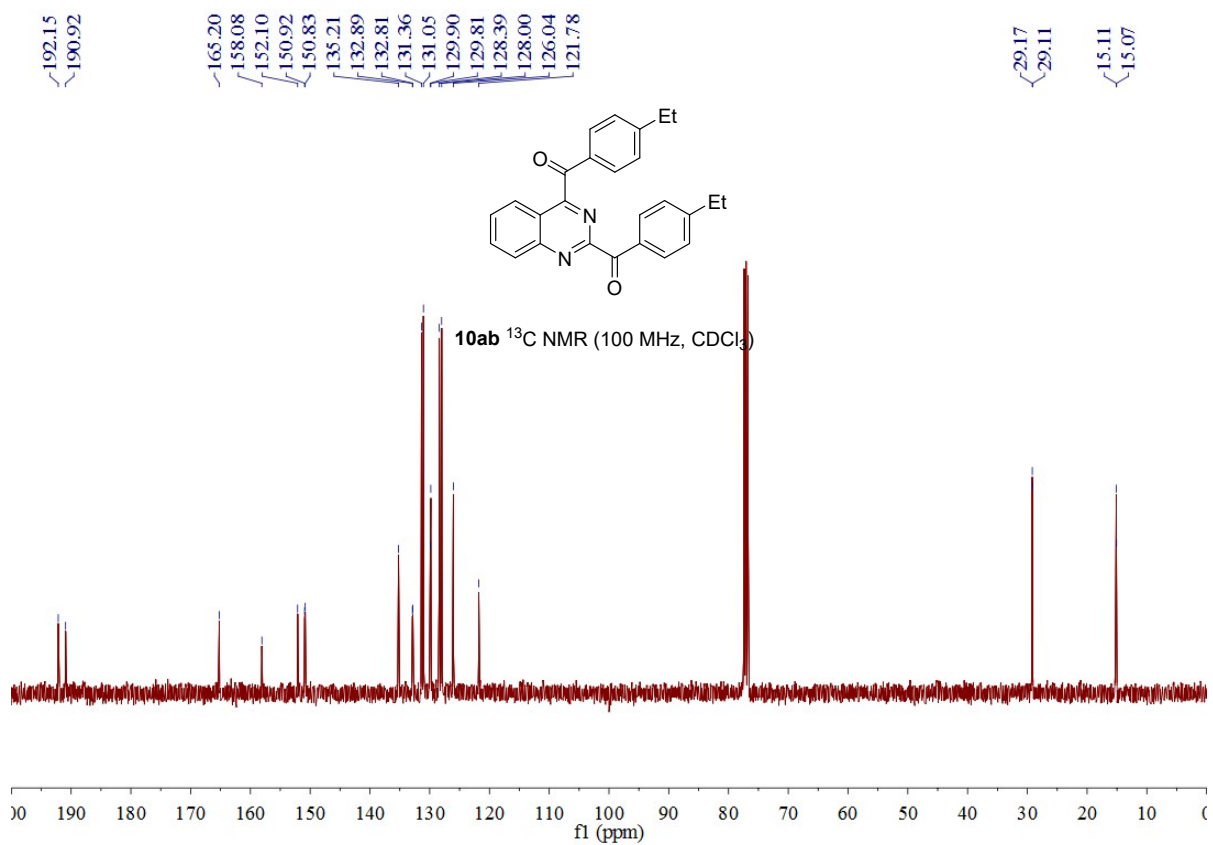

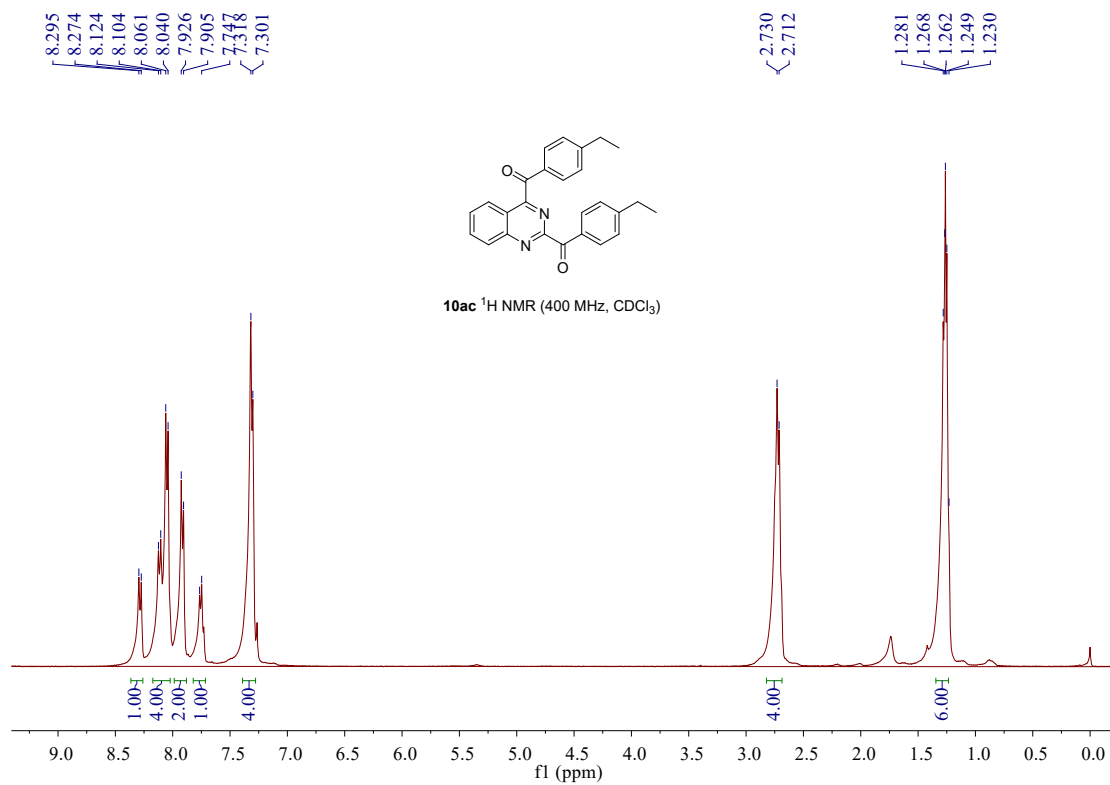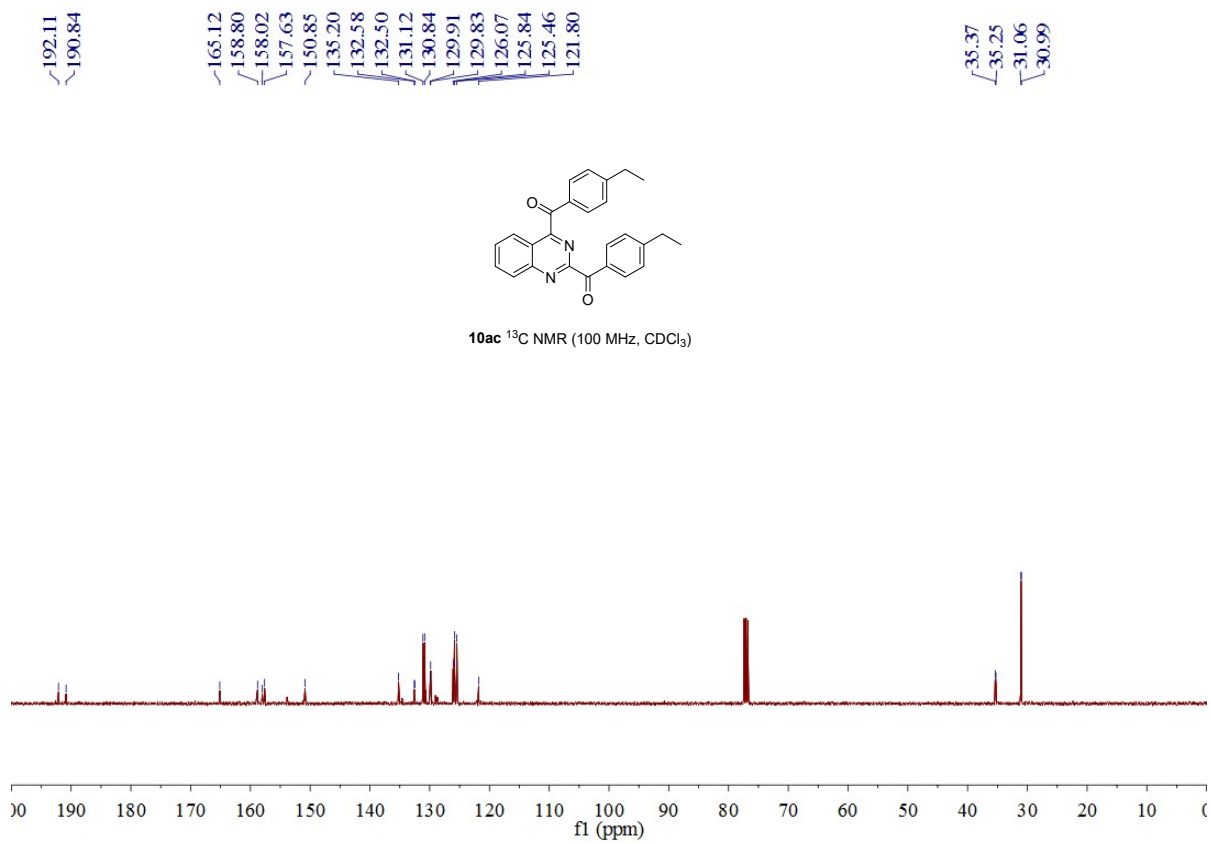

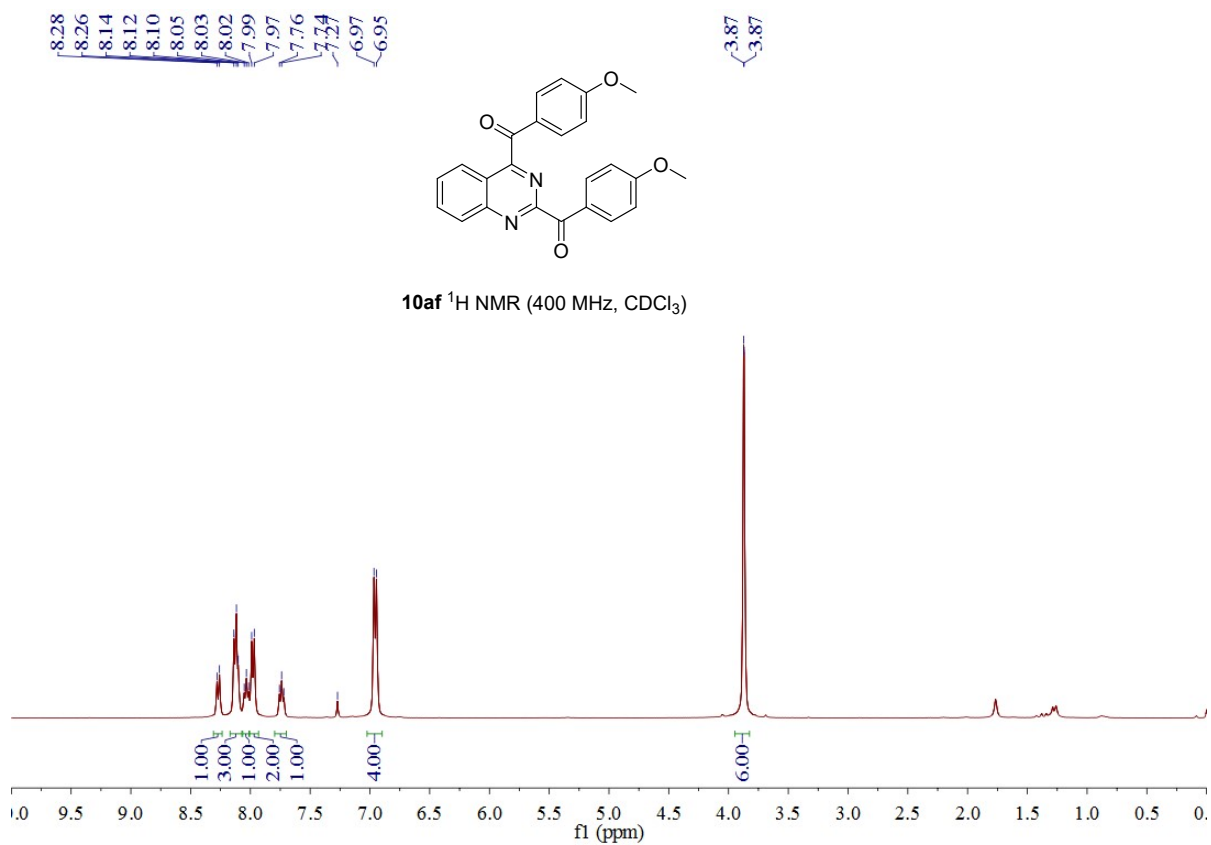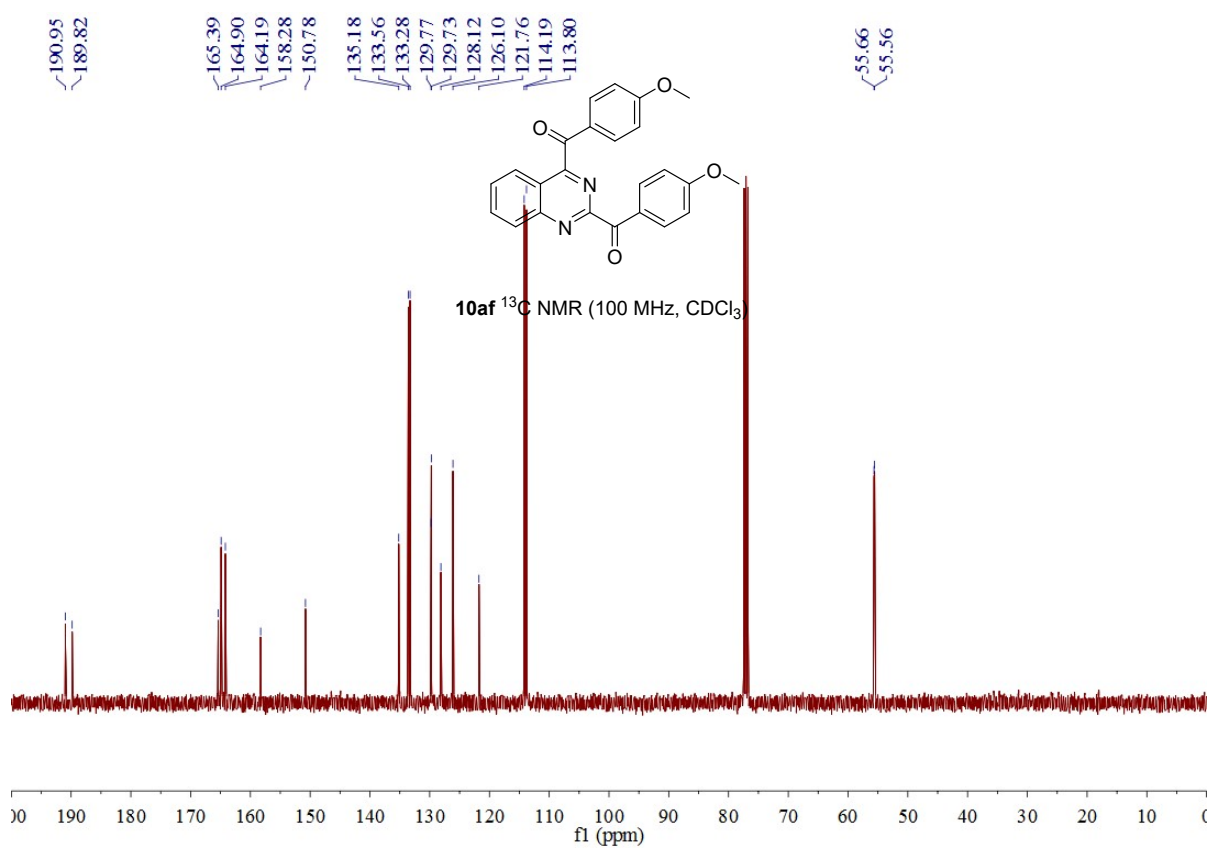

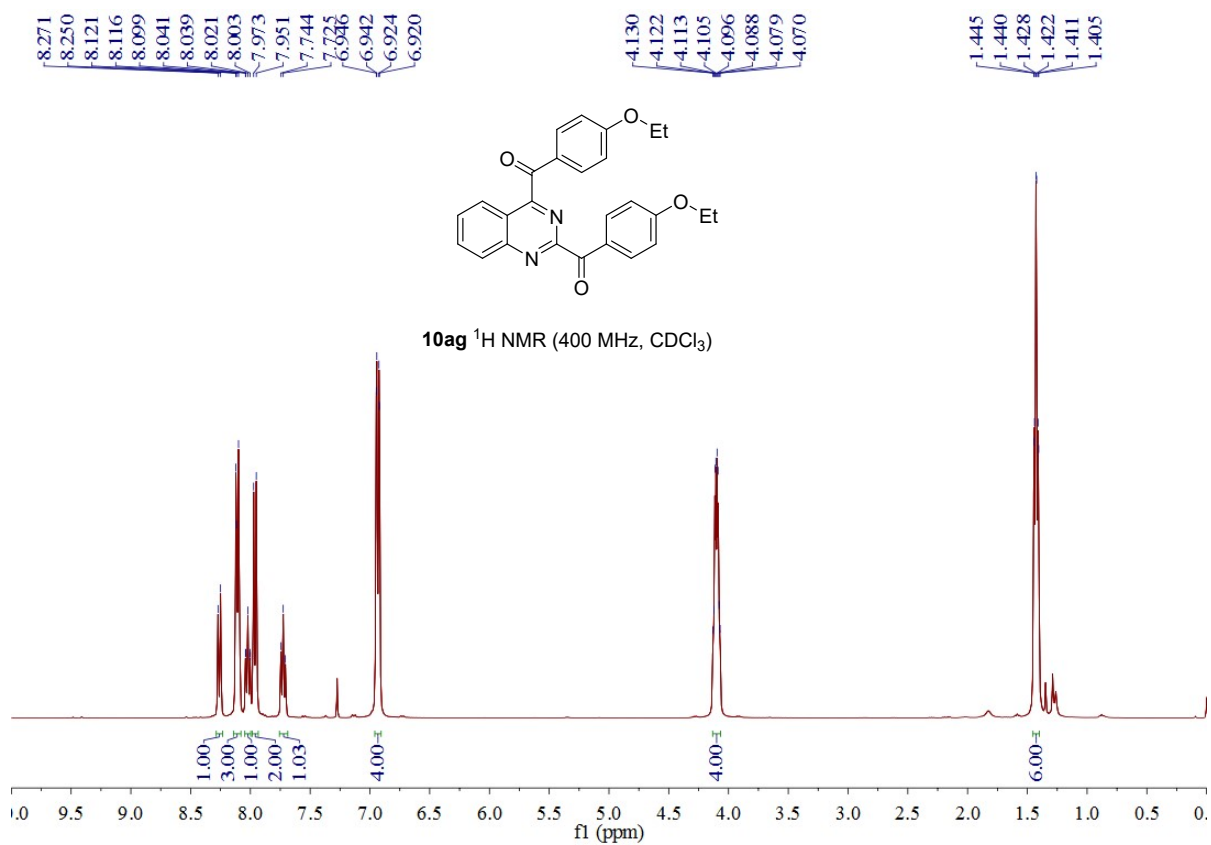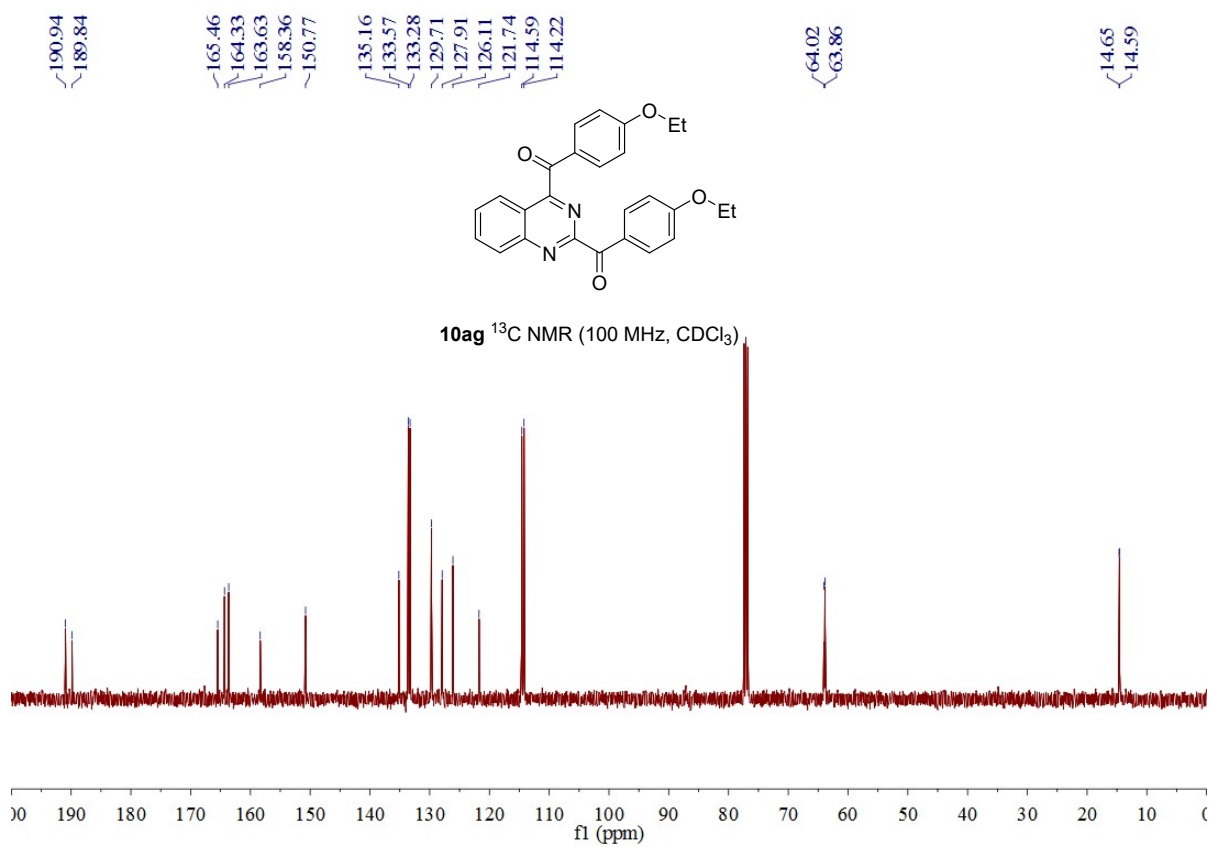

8.279  
8.258  
8.146  
8.124  
8.055  
8.037  
8.018  
8.016  
7.995  
7.973  
7.771  
7.752  
7.733  
7.410  
7.391  
7.371  
7.255  
7.223  
7.216  
7.204  
7.198  
7.186  
7.179  
7.096  
7.078  
7.060  
7.025  
7.015  
7.003  
6.993

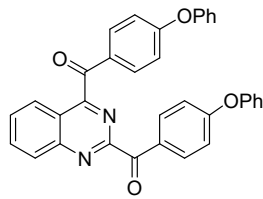

10ah <sup>1</sup>H NMR (400 MHz, CDCl<sub>3</sub>)

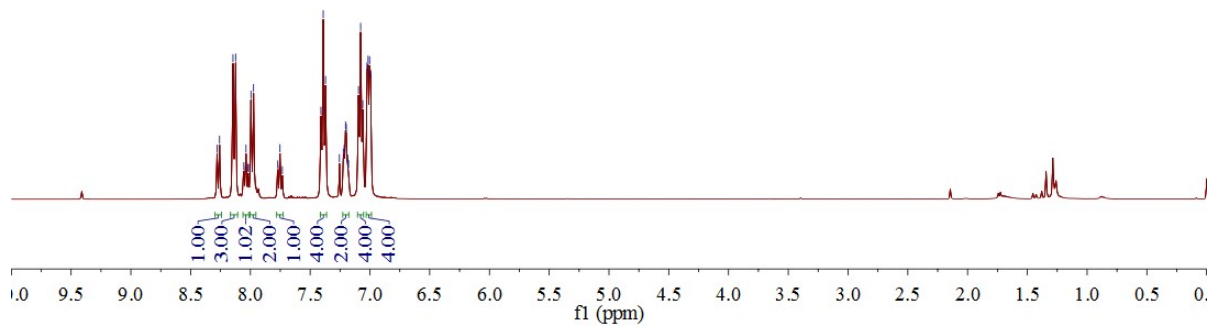

190.90  
189.70  
165.10  
163.58  
162.74  
157.87  
155.22  
154.90  
150.80  
135.32  
133.58  
133.30  
130.19  
130.11  
130.02  
129.80  
129.64  
129.46  
126.09  
125.10  
124.84  
121.79  
120.51  
120.41  
117.28  
117.09

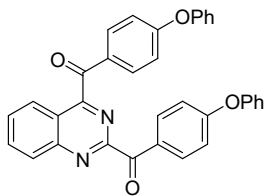

10ah <sup>13</sup>C NMR (100 MHz, CDCl<sub>3</sub>)

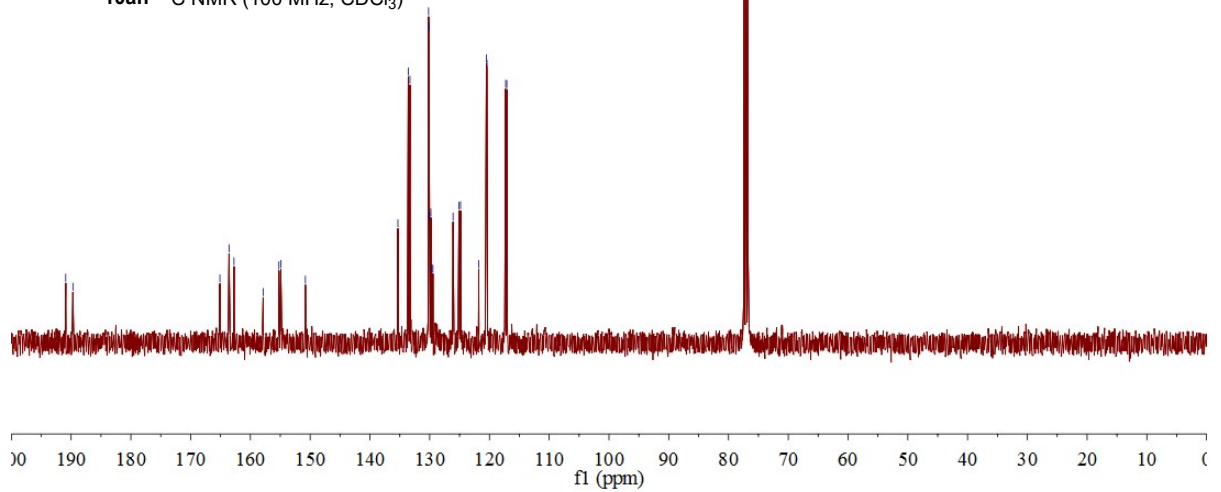

10 au

8.729  
8.708  
8.301  
8.280  
8.050  
8.032  
8.011  
7.846  
7.825  
7.807

3.409  
3.390  
3.386  
3.367  
3.348

1.854  
1.835  
1.813  
1.793  
1.774  
1.506  
1.487  
1.468  
1.449  
0.998  
0.985  
0.967

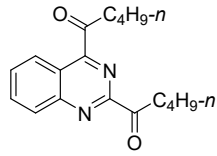

10au <sup>1</sup>H NMR (400 MHz, CDCl<sub>3</sub>)

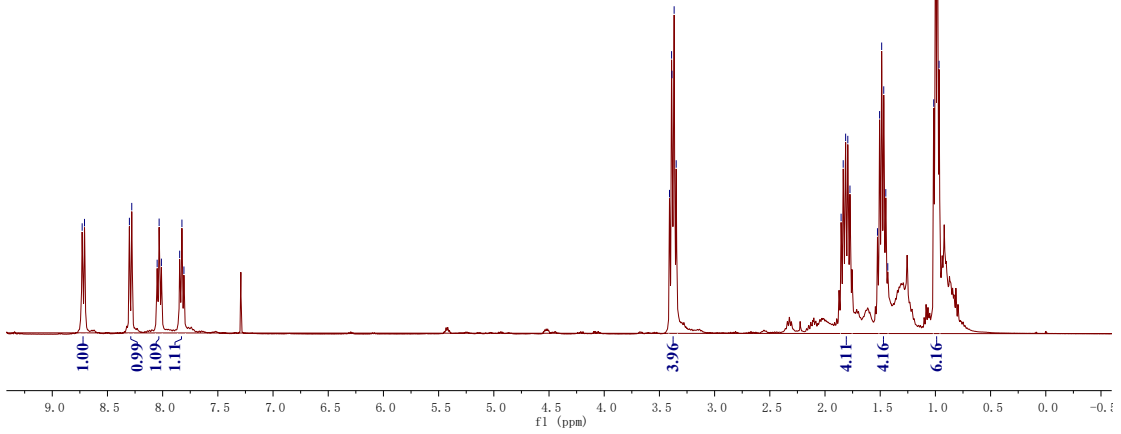

10 au

203.82  
200.11

160.53  
155.37  
152.10

134.80  
131.04  
130.16  
126.44  
120.97

39.95  
39.10  
26.29  
25.85  
22.48  
22.36  
13.93

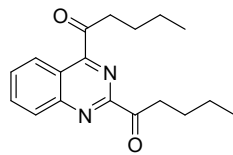

10au <sup>13</sup>C NMR (100 MHz, CDCl<sub>3</sub>)

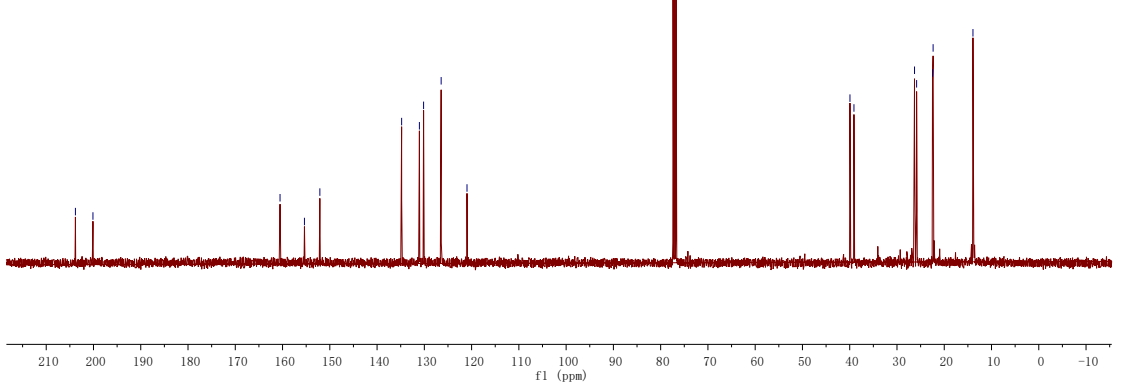

8.73  
8.71  
8.30  
8.28  
8.05  
8.03  
8.03  
8.01  
8.01  
7.85  
7.83  
7.83  
7.82  
7.27  
3.40  
3.38  
3.37  
3.36  
3.36  
3.34  
1.87  
1.85  
1.83  
1.83  
1.81  
1.81  
1.79  
1.46  
1.45  
1.45  
1.44  
1.43  
1.43  
1.42  
1.41  
1.41  
1.40  
1.38  
1.37  
1.36  
1.34  
1.29  
1.25  
-0.95  
-0.94  
-0.93  
-0.92  
-0.91

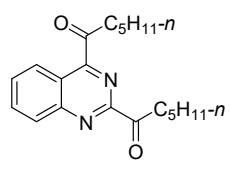

**10av** <sup>1</sup>H NMR (400 MHz, CDCl<sub>3</sub>)

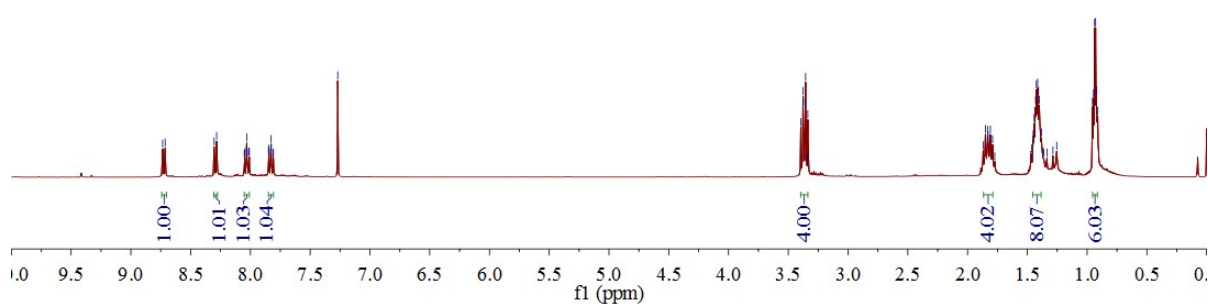

-203.88  
-200.17  
  
-160.55  
-155.40  
-152.14  
  
134.82  
131.05  
130.19  
126.47  
121.00  
  
40.22  
39.39  
31.56  
31.40  
23.91  
23.46  
22.51  
13.96  
13.92

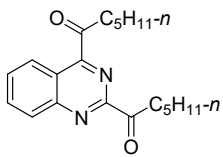

**10av** <sup>13</sup>C NMR (100 MHz, CDCl<sub>3</sub>)

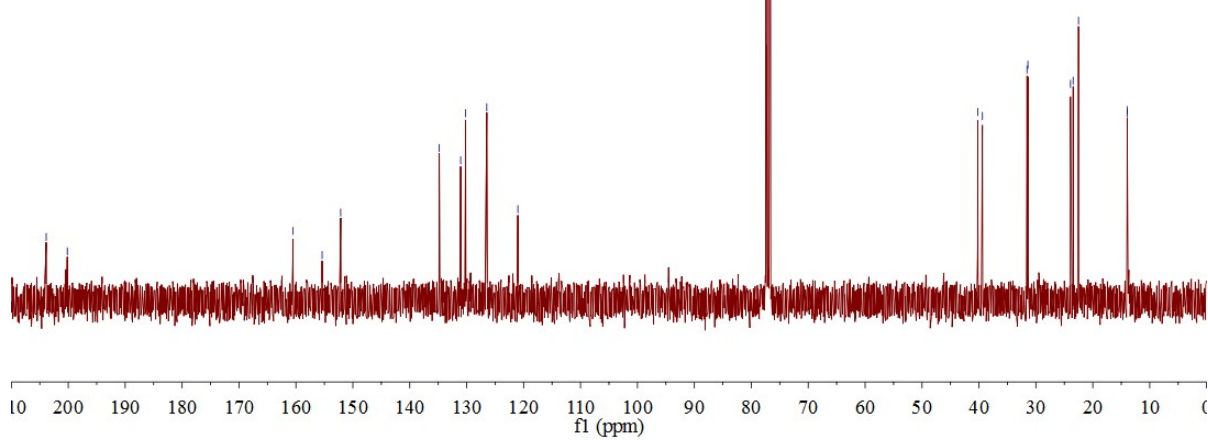



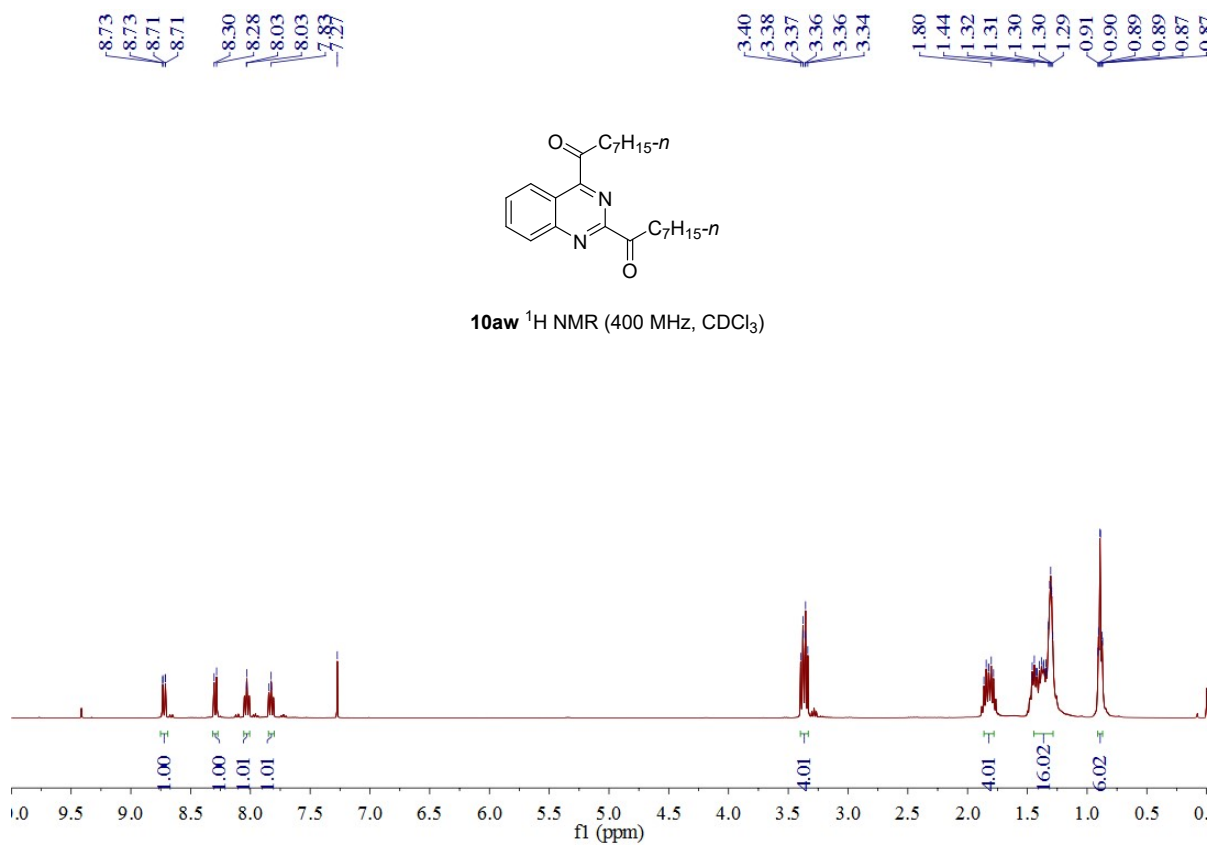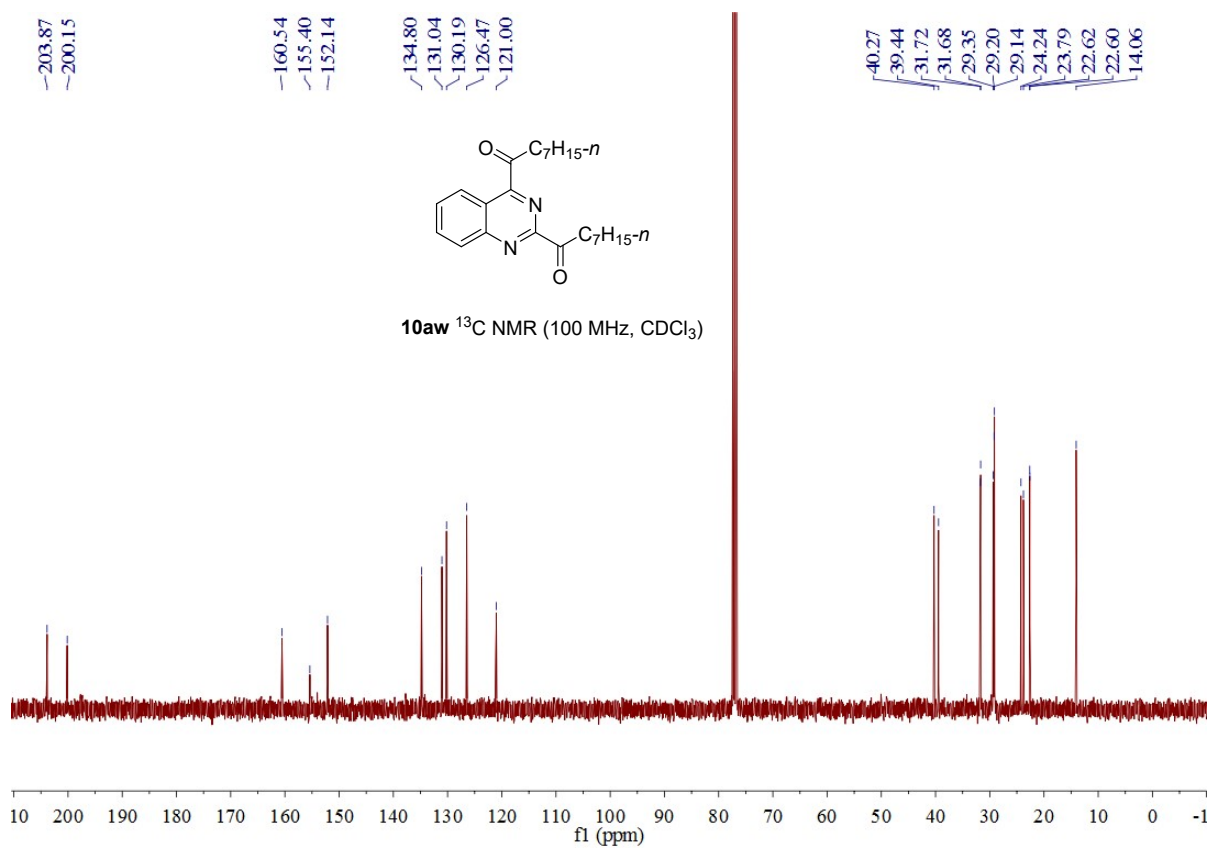

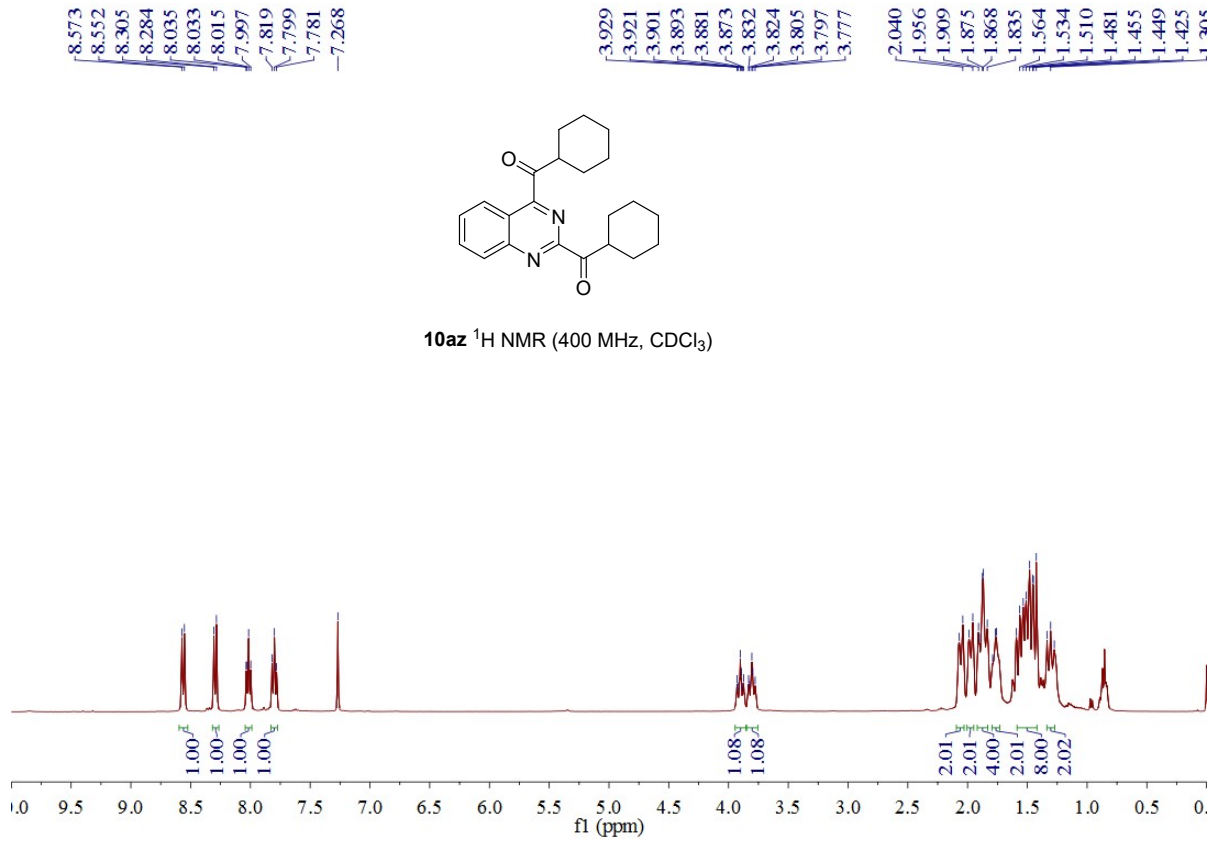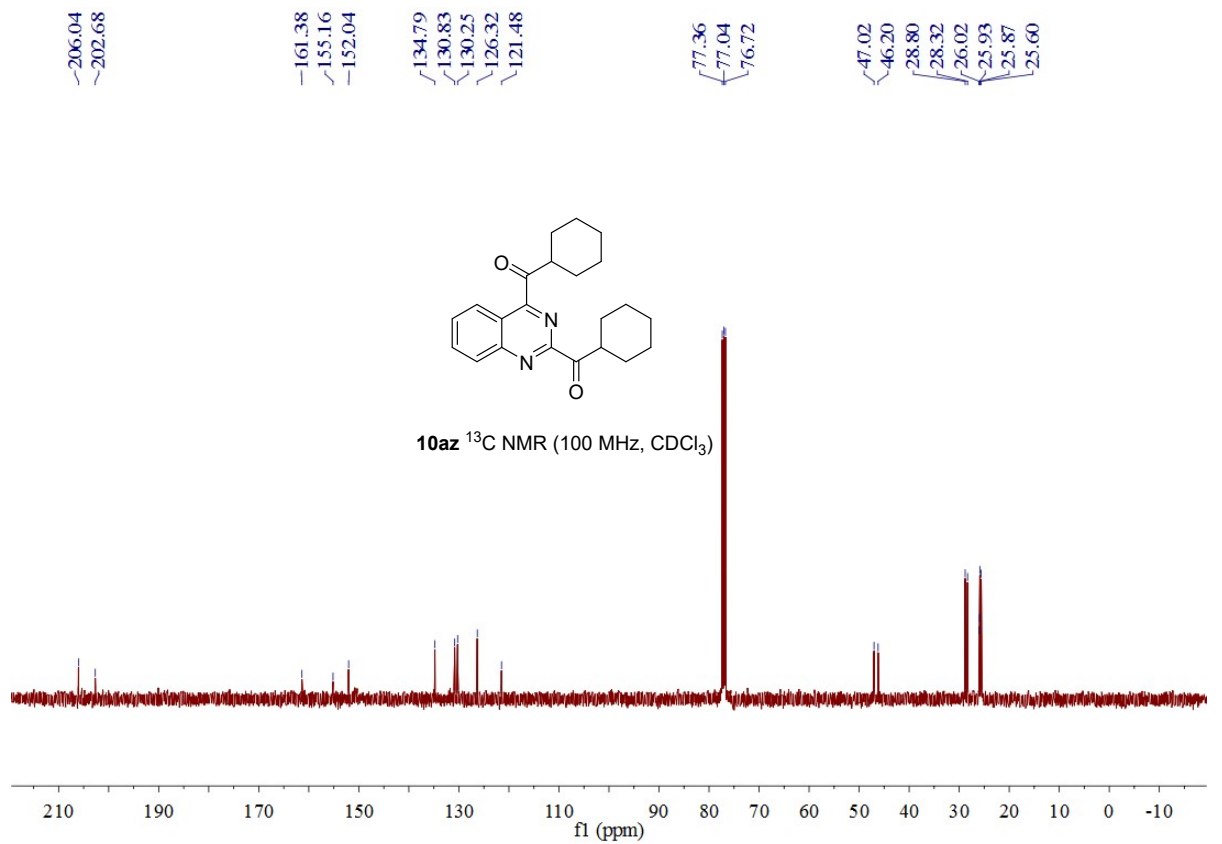

## Copy of Products 11 NMR

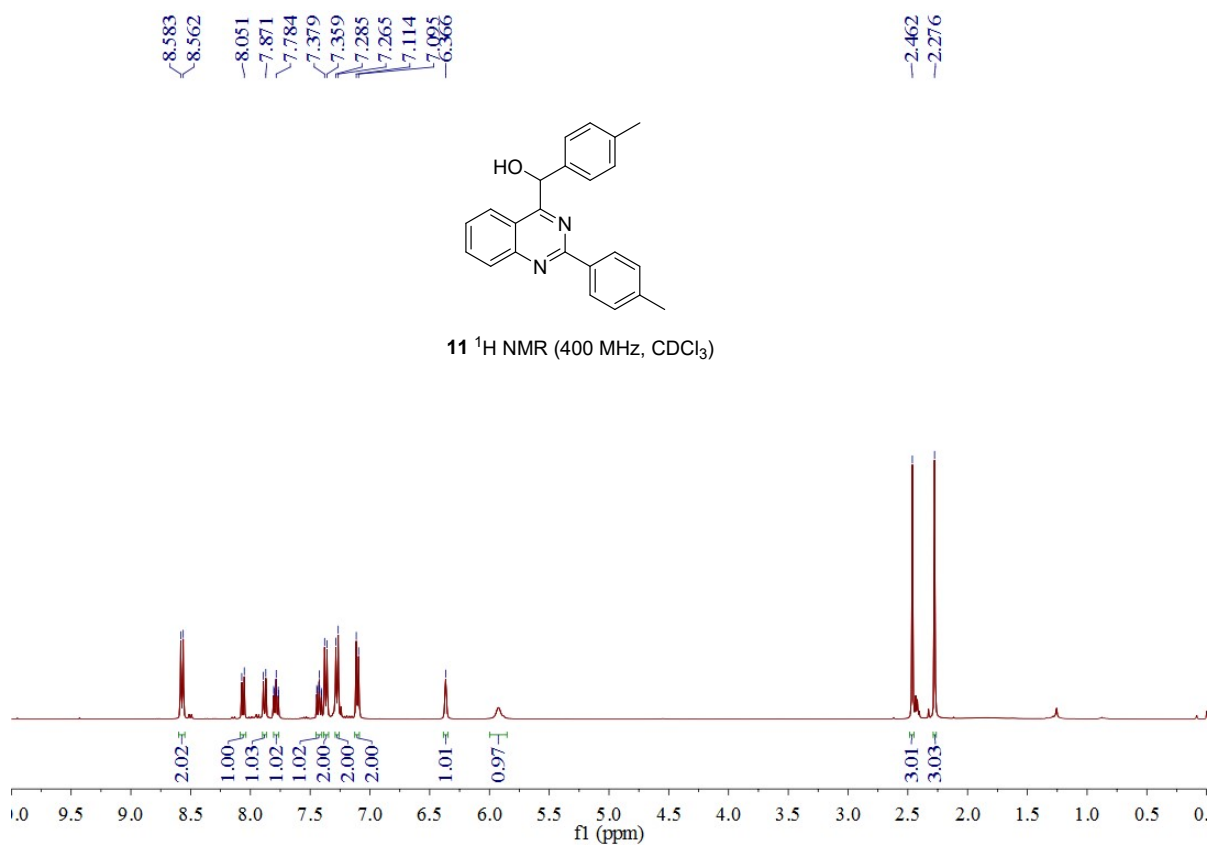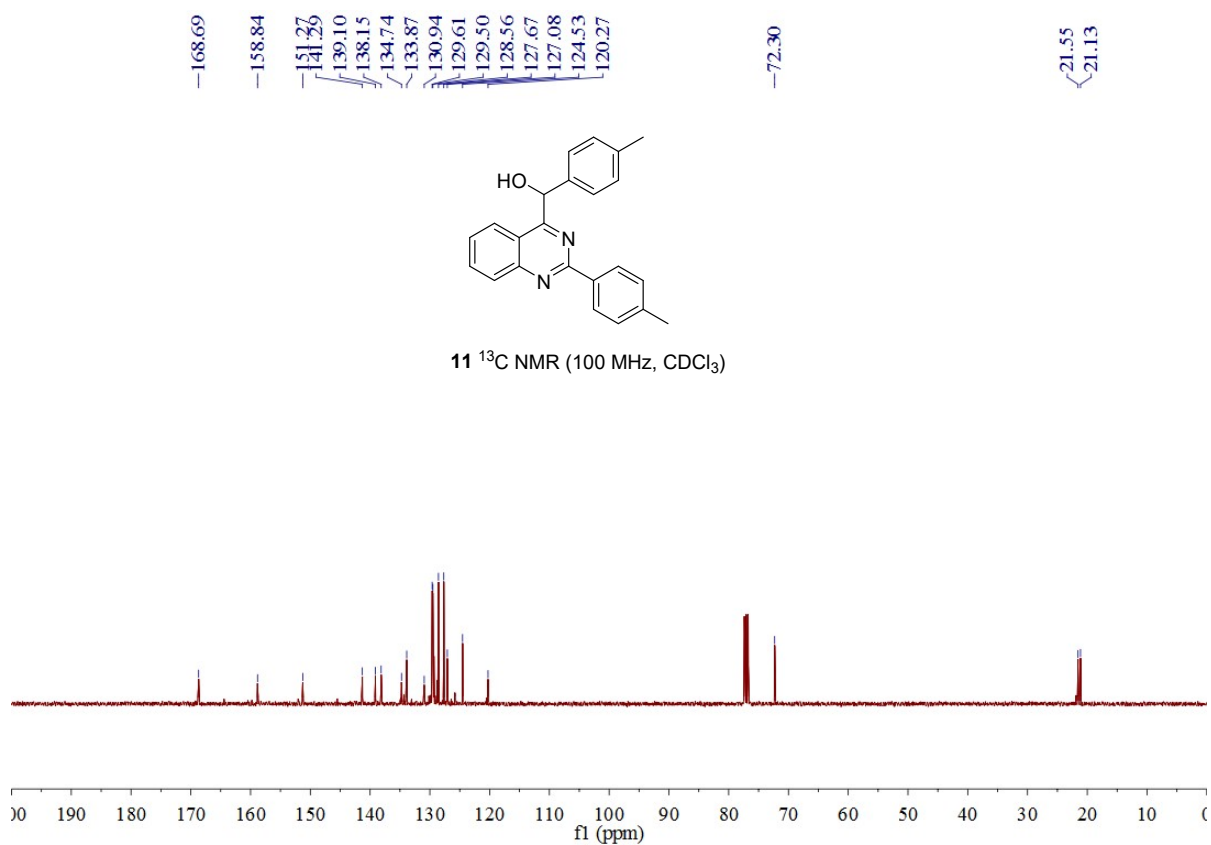

## Copy of Products 12 NMR

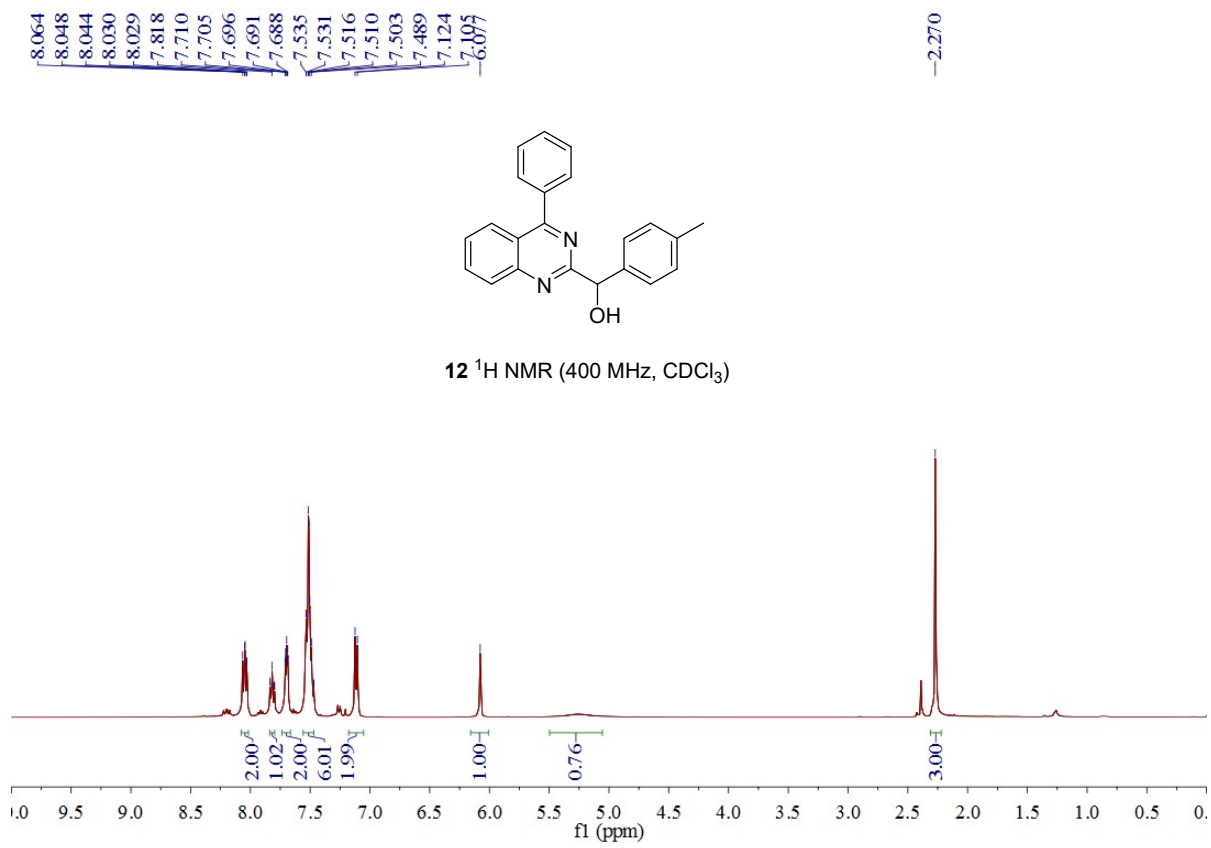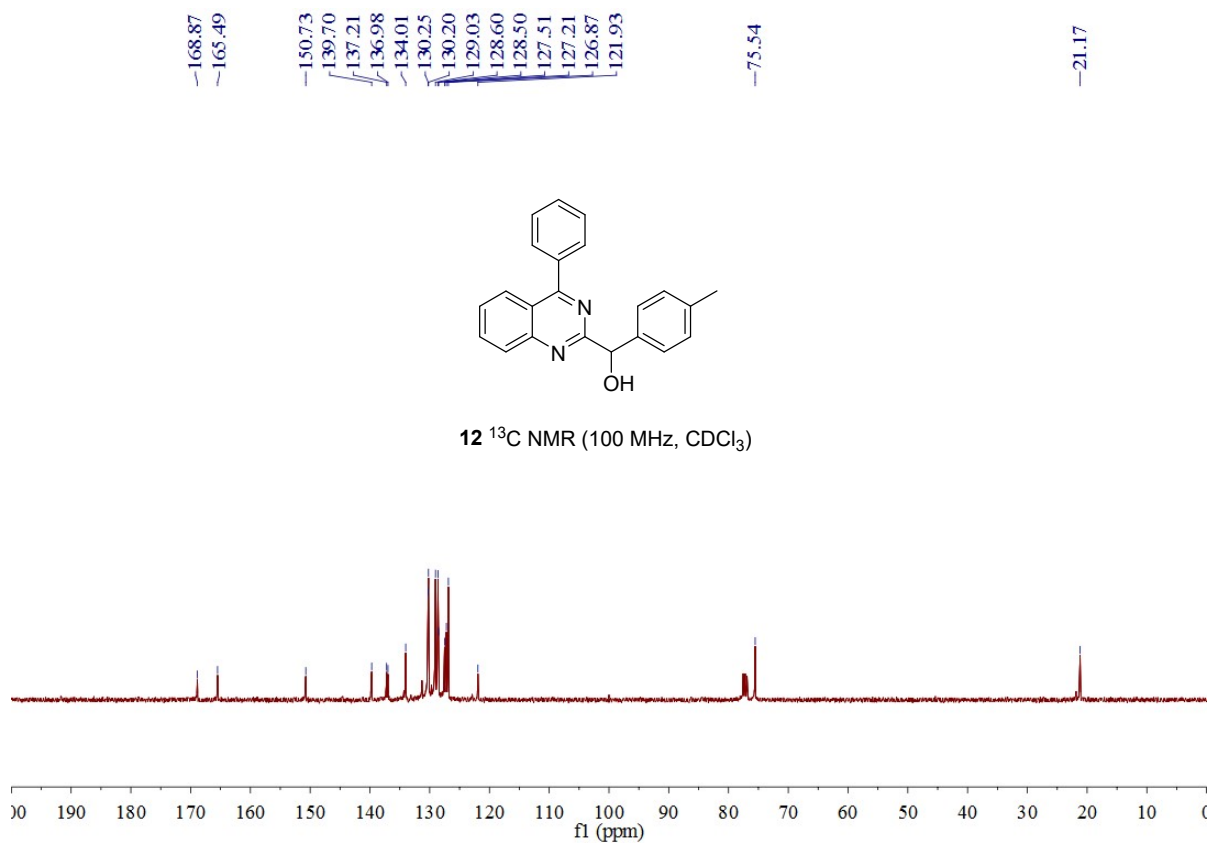

## II The HPLC-MS Figure of adducts **15** and **16**

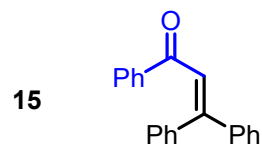

HRMS (ESI):  $m/z$   $[M+H]^+$  calcd for  $C_{21}H_{17}O$ : 285.1279, Found: 285.1267

R<sub>Y</sub>-3-pos-0329

R<sub>Y</sub>-3-pos-0329 864 (9.543)

1: TOF MS ES+  
2.35e4

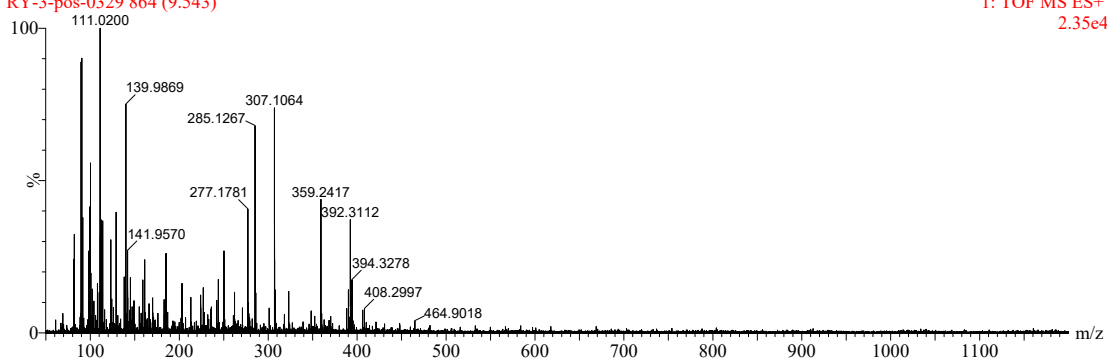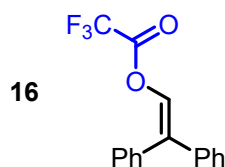

HRMS (ESI):  $m/z$   $[M+H]^+$  calcd for  $C_{16}H_{12}O$ : 293.0789, Found: 293.0790

R<sub>Y</sub>-3-pos-0329

R<sub>Y</sub>-3-pos-0329 688 (7.600)

1: TOF MS ES+  
1.06e4

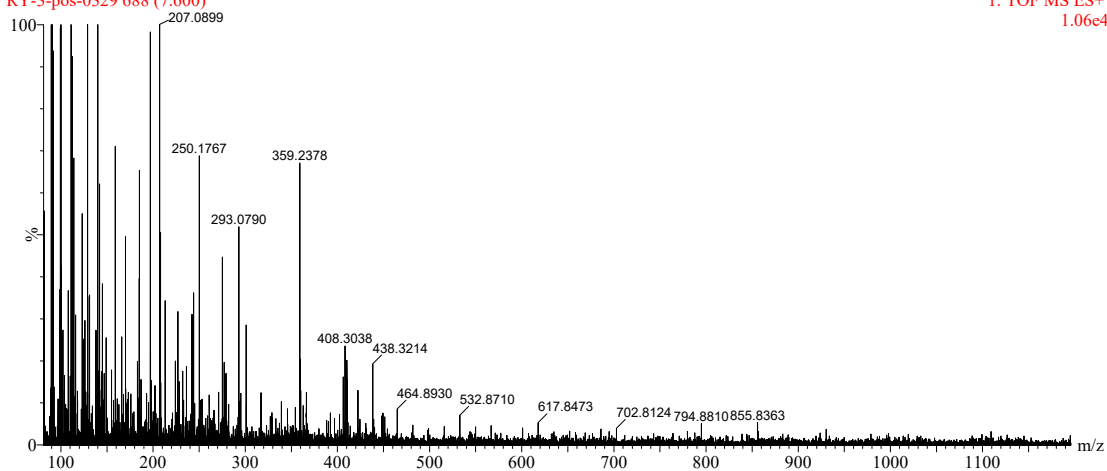

Supplement: d3ob01349a1.pdf [file d3ob01349a1.pdf]
